# Supplementary material for: Workplace violence against healthcare professionals in a multiethnic area: a cross-sectional study in southwest China
Source: PubMed Central journal article supplement — BMJ Open. 2020 Sep 9;10(9):e037464. doi: 10.1136/bmjopen-2020-037464 (PMC7482505; doi:10.1136/bmjopen-2020-037464), 2020-09-09
Supplement: bmjopen-2020-037464.draft_revisions.pdf [file bmjopen-2020-037464.draft_revisions.pdf]

# BMJ Open

BMJ Open is committed to open peer review. As part of this commitment we make the peer review history of every article we publish publicly available.

When an article is published we post the peer reviewers' comments and the authors' responses online. We also post the versions of the paper that were used during peer review. These are the versions that the peer review comments apply to.

The versions of the paper that follow are the versions that were submitted during the peer review process. They are not the versions of record or the final published versions. They should not be cited or distributed as the published version of this manuscript.

BMJ Open is an open access journal and the full, final, typeset and author-corrected version of record of the manuscript is available on our site with no access controls, subscription charges or pay-per-view fees (<http://bmjopen.bmj.com>).

If you have any questions on BMJ Open's open peer review process please email [info.bmjopen@bmj.com](mailto:info.bmjopen@bmj.com)

# BMJ Open

## Workplace violence against healthcare professionals in multi-ethnicity area: a cross-sectional study in southwest China

|                               |                                                                                                                                                                                                                                                                                                                                                                                                                                                                                                                                                                                                                                                                                                                                                                                                                                                                                                                                                                                                                                                                                                                                                                                                                                                                                   |
|-------------------------------|-----------------------------------------------------------------------------------------------------------------------------------------------------------------------------------------------------------------------------------------------------------------------------------------------------------------------------------------------------------------------------------------------------------------------------------------------------------------------------------------------------------------------------------------------------------------------------------------------------------------------------------------------------------------------------------------------------------------------------------------------------------------------------------------------------------------------------------------------------------------------------------------------------------------------------------------------------------------------------------------------------------------------------------------------------------------------------------------------------------------------------------------------------------------------------------------------------------------------------------------------------------------------------------|
| Journal:                      | <i>BMJ Open</i>                                                                                                                                                                                                                                                                                                                                                                                                                                                                                                                                                                                                                                                                                                                                                                                                                                                                                                                                                                                                                                                                                                                                                                                                                                                                   |
| Manuscript ID                 | bmjopen-2020-037464                                                                                                                                                                                                                                                                                                                                                                                                                                                                                                                                                                                                                                                                                                                                                                                                                                                                                                                                                                                                                                                                                                                                                                                                                                                               |
| Article Type:                 | Original research                                                                                                                                                                                                                                                                                                                                                                                                                                                                                                                                                                                                                                                                                                                                                                                                                                                                                                                                                                                                                                                                                                                                                                                                                                                                 |
| Date Submitted by the Author: | 04-Feb-2020                                                                                                                                                                                                                                                                                                                                                                                                                                                                                                                                                                                                                                                                                                                                                                                                                                                                                                                                                                                                                                                                                                                                                                                                                                                                       |
| Complete List of Authors:     | Jia, Haonan; Harbin Medical University, Department of Health Policy and Hospital Management, School of Public Health<br>Fang, Huiying; Harbin Medical University, Department of Health, Policy and Hospital Management, School of Public Health<br>Chen, Ruohui; Harbin Medical University, Social Medicine<br>Jiao, Mingli; Harbin Medical University, Health policy<br>Wei, Lifeng; Harbin Medical University,<br>Zhang, Gangyu; Harbin Medical University, Department of Health, Policy and Hospital Management, School of Public Health<br>Li, Yuanheng; Harbin Medical University, Department of Health Policy and Hospital Management<br>Wang, Ying; Harbin Medical University, Department of Health Policy and Hospital Management<br>Wang, Yameng; Harbin Medical University<br>Jiang, Kexin; Harbin Medical University, Department of Health, Policy and Hospital Management, School of Public Health<br>Li, Jingqun; No.1 People's Hospital of Heihe<br>Jia, Xiaowen; No.1 People's Hospital of Heihe, Department of General Surgery<br>Ismael, Omar Yacouba; Harbin Medical University, Department of Health, Policy and Hospital Management, School of Public Health<br>Wu, Qunhong; Harbin Medical School, Social Medicine<br>Mao, Jingfu; Harbin Medical University |
| Keywords:                     | Health & safety < HEALTH SERVICES ADMINISTRATION & MANAGEMENT, PUBLIC HEALTH, Health policy < HEALTH SERVICES ADMINISTRATION & MANAGEMENT                                                                                                                                                                                                                                                                                                                                                                                                                                                                                                                                                                                                                                                                                                                                                                                                                                                                                                                                                                                                                                                                                                                                         |
|                               |                                                                                                                                                                                                                                                                                                                                                                                                                                                                                                                                                                                                                                                                                                                                                                                                                                                                                                                                                                                                                                                                                                                                                                                                                                                                                   |

SCHOLARONE™  
Manuscripts

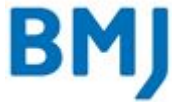

I, the Submitting Author has the right to grant and does grant on behalf of all authors of the Work (as defined in the below author licence), an exclusive licence and/or a non-exclusive licence for contributions from authors who are: i) UK Crown employees; ii) where BMJ has agreed a CC-BY licence shall apply, and/or iii) in accordance with the terms applicable for US Federal Government officers or employees acting as part of their official duties; on a worldwide, perpetual, irrevocable, royalty-free basis to BMJ Publishing Group Ltd ("BMJ") its licensees and where the relevant Journal is co-owned by BMJ to the co-owners of the Journal, to publish the Work in this journal and any other BMJ products and to exploit all rights, as set out in our [licence](#).

The Submitting Author accepts and understands that any supply made under these terms is made by BMJ to the Submitting Author unless you are acting as an employee on behalf of your employer or a postgraduate student of an affiliated institution which is paying any applicable article publishing charge ("APC") for Open Access articles. Where the Submitting Author wishes to make the Work available on an Open Access basis (and intends to pay the relevant APC), the terms of reuse of such Open Access shall be governed by a Creative Commons licence – details of these licences and which [Creative Commons](#) licence will apply to this Work are set out in our licence referred to above.

Other than as permitted in any relevant BMJ Author's Self Archiving Policies, I confirm this Work has not been accepted for publication elsewhere, is not being considered for publication elsewhere and does not duplicate material already published. I confirm all authors consent to publication of this Work and authorise the granting of this licence.

1 **Workplace violence against healthcare professionals in multi-**  
2 **ethnicity area: a cross-sectional study in southwest China**

3 Haonan Jia<sup>a\*</sup>, Huiying Fang<sup>b\*</sup>, Ruohui Chen<sup>a\*</sup>, Mingli Jiao<sup>a,c</sup>✉, Lifeng Wei<sup>a</sup>, Gangyu  
4 Zhang<sup>a</sup>, Yuanheng Li<sup>a</sup>, Ying Wang<sup>a</sup>, Yameng Wang<sup>a</sup>, Kexin Jiang<sup>d</sup>, Jingqun Li<sup>e</sup>,  
5 Xiaowen Jia<sup>f</sup>, Omar Yacouba Ismael<sup>a</sup>, Jingfu Mao<sup>g</sup>✉, Qunhong Wu<sup>h</sup>

6 *a Department of Health Policy and Hospital Management, Harbin Medical University,*  
7 *Nangang District, Harbin, China;*

8 *b President's Office of Qingdao Women and Children's Hospital, Shibei District,*  
9 *Qingdao, China;*

10 *c Chinese Academy of Social Science, Institute of Quantitative & Technical Economics,*  
11 *Dongcheng District, Beijing China;*

12 *d Medical department, General Hospital of Heilongjiang Agricultural Reclamation,*  
13 *Harbin 150088, China*

14 *e Department of Cardiology, No.1 People's Hospital of Heihe, Aihui District, Heihe,*  
15 *China;*

16 *f Department of General Surgery, No.1 People's Hospital of Heihe, Aihui District,*  
17 *Heihe, China;*

18 *g Department of Human Resource Management, Harbin Medical University, Nangang*  
19 *District, Harbin, China;*

20 *h Department of Social Medicine, Harbin Medical University, Nangang District,*  
21 *Harbin, China*

22 \*Contributed Equally

1  
2  
3  
4 **23 Corresponding author:**  
5

6  
7 24 Mingli Jiao, Harbin Medical University, 157 Baojian Road, Nangang District, Harbin,  
8  
9 25 Heilongjiang, 150086, China. Email: minglijiao@126.com. [Tel:+86 13613675693](tel:+8613613675693)  
10

11  
12 26 Jingfu Mao, Harbin Medical University, 157 Baojian Road, Nangang District, Harbin,  
13  
14 27 Heilongjiang, 150086, China. Email: mjfhyd@yeah.com. [Tel:+86 13836134966](tel:+8613836134966)  
15  
16

17 **28 Word count:3612**  
18

19 **29 Abstract**  
20

21  
22 30 Objective: The purpose of this study is to examine WPV towards healthcare  
23  
24 31 professionals in multi-ethnicity area of China, including prevalence, influencing  
25  
26 32 factors, healthcare professionals' response to WPV, expected anti-violence  
27  
28 33 training measures and content, and evaluation of WPV interventions.  
29

30  
31 34 Methods: We conducted a cross-sectional study in a Grade III Class A hospital in  
32  
33 35 the capital of Yunnan province, which is the province with most kinds of ethnic  
34  
35 36 minorities groups in China. Data were collected from July to October 2017 using  
36  
37 37 questionnaires designed jointly by International Labour Office (ILO),  
38  
39 38 International Council of Nurses (ICN), World Health Organization (WHO), and  
40  
41 39 Public Services International (PSI). Descriptive statistics, Chi-square test, Fisher's  
42  
43 40 exact test, propensity score matching (PSM) and logistic regression were used to  
44  
45 41 analyze. A total of 2,036 valid questionnaires were collected. The prevalence of  
46  
47 42 physical and psychological violence was 5.4% and 43.7%, respectively.  
48  
49

50  
51 43 Results: Healthcare professionals who were ethnic minorities were more likely to  
52  
53 44 experience psychological violence. After stratified by gender, males who are ethnic  
54  
55  
56  
57  
58  
59  
60

1  
2  
3  
4 45 minorities suffered more physical violence, while females psychological violence .

5  
6 46 We also found a unique work situation in China—overtime duty call work (6pm-

7  
8  
9 47 7am) was a risk factor of psychological violence (OR=1.403,  $p<0.05$ ). Ethnic

10  
11 48 minority healthcare professionals less likely to order perpetrators to stop or to

12  
13  
14 49 report to superiors when facing psychological violence ( $p<0.05$ ). Ethnic minority

15  
16  
17 50 healthcare professionals are more interested in receiving training of force skills

18  
19 51 and self-defense. Both Han and ethnic minority participant considered security

20  
21 52 measures as the most useful intervention, while changing the time of shift as the

22  
23  
24 53 most useless one.

25  
26  
27 54 Conclusion: Our study comprehensively described WPV towards healthcare

28  
29 55 professionals in multi-ethnicity minority area. More WPV research conducted in

30  
31 56 multi-ethnicity area are needed.

32  
33  
34 57 **Keyword:** Workplace violence; healthcare professionals; multi-ethnicity area

35  
36  
37 58 **Strengths and limitations**

38  
39  
40 59 ✧ Although lots of study investigate WPV in hospital, few of them conducted in  
41  
42 60 multi-ethnicity minority area.

43  
44  
45 61 ✧ Different with previous studies that pay attention to single part of WPV, our  
46  
47 62 study describe WPV comprehensively including prevalence, influencing factor,  
48  
49 63 response to WPV.etc.

50  
51  
52 53 ✧ Due to the recall bias or reporting bias resulting from shame and stigma, the  
53  
54 64 number of violence events in past 12 months may be underestimated.

55  
56  
57 65 ✧ Our study didn't explain WPV using cultural factors, which needs further study  
58  
59 66

1  
2  
3  
4 67 to fulfill.  
5  
6

7 68 **1. Introduction**  
8

9 69 In December 2019, a doctor was killed brutally by a patient's family member in  
10  
11 70 Beijing. Less than a month later, another doctor in Beijing hospital was stabbed  
12  
13  
14 71 and severe injured. These 2 cases once again drew great attention to the safety of  
15  
16  
17 72 healthcare professionals in Chinese society.  
18

19 73 Workplace violence (WPV) towards healthcare professionals is an extremely  
20  
21  
22 74 serious problem in China lasted for a long time. From 2000 to 2015, there were  
23  
24  
25 75 less than 290 severe WPV towards healthcare workers reported by media<sup>1</sup>. The  
26  
27 76 seriousness of WPV towards healthcare professionals in China leads to great  
28  
29  
30 77 attention from researchers. Most of researches that studied WPV prevalence of  
31  
32  
33 78 China were conducted in the area that Han people (the main ethnic group in China)  
34  
35 79 mainly lives in ,and the reported rates of physical and psychological violence are  
36  
37  
38 80 6.4%–35.4% and 54.4%–79.8%, respectively<sup>2-7</sup>. However, few WPV studies  
39  
40  
41 81 conducted in multi-ethnicity area of China. According to the latest national census  
42  
43 82 in 2010, ethnic minorities account for 8.49% of the total population in China. In  
44  
45  
46 83 multi-ethnicity area, the proportion and ethnic diversity of both ethnic minority  
47  
48 84 patients and healthcare professionals is higher. In addition, research has revealed  
49  
50  
51 85 that due to the relatively lower level of education in general, ethnic minorities may  
52  
53  
54 86 suffered work discrimination to some extent<sup>8</sup>. However, since healthcare  
55  
56  
57 87 profession requires high level of skill and education, it's still unknow whether this  
58  
59  
60 88 discrimination exists in healthcare workplace or not. It's essential to provide more

1  
2  
3  
4 89 information of WPV in multi-ethnicity area thus conduct specific interventions.  
5

6  
7 90 Also, limited studies from other counties and regions focus on WPV towards  
8  
9 91 healthcare professionals in multi-ethnicity areas.  
10

11 92 Although many studies have investigated the influence factor of WPV towards  
12  
13 93 healthcare professionals, an essential factor has been neglected. In China, the  
14  
15 94 medical system requires healthcare workers to be on 24 hours standby and to be  
16  
17 95 able to connect with for on-call work beyond the general worktime. Due to the  
18  
19 96 work regulation, healthcare professionals in charge are responsible for their  
20  
21 97 patients at any time, even when they have already got off work or have a rest. In  
22  
23 98 addition, healthcare workers who are on duty would ask their superior or  
24  
25 99 healthcare professionals in charge of patients for help when meet severe  
26  
27 100 situations. These make it common that physicians who are at rest must go back  
28  
29 101 work if needed, which often happens in late night. However, limited study has  
30  
31 102 taken this factor into consideration.  
32  
33  
34  
35  
36  
37  
38  
39

40 103 Due to the research purpose and background, most previous WPV studies were  
41  
42 104 conducted in several hospitals, which has several advantages. Firstly, more  
43  
44 105 samples could be collected to make a more reliable conclusion. In addition, the  
45  
46 106 results could reflect common problems in a certain context. However, at the same  
47  
48 107 time, it would neglect some specific factors or characteristics. The investigation  
49  
50 108 conducted in a typical and representative hospital is conducive to examine the  
51  
52 109 relation between specific factors or information and WPV, which could also be an  
53  
54 110 effective reference of practical work for hospitals with similar features. As for  
55  
56  
57  
58  
59  
60



1  
2  
3  
4 111 multi-ethnicity area, the study conducted in several hospitals may cover up the  
5  
6 112 features of ethnic minorities due to the difference proportion of ethnic groups in  
7  
8  
9 113 each hospital. Therefore, it's necessary to choose a hospital that is both  
10  
11  
12 114 representative for the region and with the proper proportion of ethnic groups.

13  
14 115 Most previous WPV studies have only investigate a part of WPV, such as  
15  
16  
17 116 prevalence, influencing factors, or interventions. In this study, we aim to  
18  
19  
20 117 investigate the WPV in a general hospital of multi-ethnicity area, including the  
21  
22 118 prevalence, influencing factors, response to WPV and evaluation of WPV  
23  
24  
25 119 intervention, which could not only interpret WPV from a broader perspective, but  
26  
27 120 also provide more reference for practice.

## 30 121 **2.Methods**

### 32 122 *2.1 Study population*

34  
35 123 Yunnan, located in southwestern border of China, has the greatest diversity of  
36  
37  
38 124 ethnic minorities in southwestern China, containing 52 of 56 ethnic groups (51  
39  
40 125 ethnic minority groups and Han). In 2017, 33.6% residents in Yunnan were ethnic  
41  
42  
43 126 minority groups.

44  
45 127 We conducted a retrospective survey in a Grade III Class A hospital in Kunming,  
46  
47  
48 128 the capital of Yunnan Province. The hospital was founded in 1939 and is the first  
49  
50  
51 129 Grade III Class A hospital in Yunnan Province. It is one of the most capable general  
52  
53 130 hospitals in Yunnan, containing 2,400 open beds and over 2 million annual total  
54  
55  
56 131 visits. Around 18.6% the hospital employees were ethnic minorities at the time of  
57  
58  
59 132 the study. As a medical center in the province, it has wide radiation range, and  
60

1  
2  
3  
4 133 patients from all over the province come to the hospital ask for medical treatment.  
5

6  
7 134 *2.2 Questionnaire*  
8

9 135 A questionnaire developed jointly by the International Labour Office (ILO),  
10  
11 136 International Council of Nurses (ICN), World Health Organization (WHO), and  
12  
13  
14 137 Public Services International (PSI) in 2003 was used to measure hospital WPV<sup>9</sup>.  
15  
16  
17 138 First, we asked for permission to use the questionnaire from the ILO and WHO.  
18  
19 139 Then, we translated it into Mandarin Chinese and back translated it into English  
20  
21  
22 140 to verify the accuracy of the Mandarin version. After this translation processed, 17  
23  
24  
25 141 experts in the field of healthcare were invited to assess the effectiveness of the  
26  
27 142 measurement tools, including the applicability of culture and the appropriateness  
28  
29  
30 143 of language. We selected 79 medical staff to form a group and conducted a two-  
31  
32  
33 144 week test-retest reliability test (0.83).  
34

35 145 The questionnaire included the following sections: (1) demographics (e.g.,  
36  
37 146 gender, age, education, ethnicity, occupation) and work status (e.g., shift work,  
38  
39  
40 147 overtime duty call work, participation in anti-violence training, anxiety regarding  
41  
42  
43 148 WPV); (2) experience of physical violence in the past 12 months (i.e., intentional  
44  
45  
46 149 behavior that harms healthcare workers physically); (3) experience of  
47  
48 150 psychological violence in the past 12 months (i.e., verbal abuse, threatening events,  
49  
50  
51 151 and sexual harassment); (4) healthcare professionals' response to physical  
52  
53  
54 152 violence and psychological violence; (5) the expected measures (e.g. leaflets, video,  
55  
56 153 lecture) and content of anti-violence training (e.g. WPV cognition, self-defense; (6)  
57  
58 154 the evaluation of usefulness of WPV interventions.  
59  
60

### 155 *2.3 Sample and data collection*

156 First, we obtained permission from the hospital management office and human  
157 resources department to collect employee's information in the whole hospital.  
158 Then, the person who is in charge of each unit issued a questionnaire to the staff  
159 and informed them of the instructions and precautions. The study subjects  
160 included doctors, nurses, medical technicians, etc. and was conducted on the basis  
161 of voluntary and anonymous.

162 Because the respondents were asked to provide their experience of WPV in the  
163 previous 12 months, we excluded employees who met any of the following criteria:  
164 (1) less than 1 year of work experience in this hospital; (2) short-term  
165 secondment or training (less than 12 months); (3) personnel who did not come to  
166 work during the study period due to traveling, training, vacation, etc.

167 The questionnaire had to be completed by employees themselves and could not  
168 be answered by any other person. The time of data collection ranged from July to  
169 October 2017. A total of 2,036 valid questionnaires were collected, and the  
170 effective response rate was 83.79%.

### 171 *2.4 Data analysis*

172 Descriptive statistics were used to summarize the demographic characteristics,  
173 prevalence of physical and psychological violence and the response to WPV  
174 between Han and ethnic minority participants. Chi-square test and Fisher's exact  
175 was to compare the difference of response to WPV between Han and ethnic  
176 minority healthcare workers.

1  
2  
3  
4 177 Since the bias in the number between Han and ethnic minority participants,  
5  
6  
7 178 propensity score matching (PSM) was used to match the group of ethnic minority  
8  
9  
10 179 healthcare professionals (treatment group) to the group of Han healthcare  
11  
12 180 professionals (control group) in a 1:2 manner to create two groups with similar  
13  
14 181 demographic characteristics. The propensity score model used the ethnicity as a  
15  
16  
17 182 dependent variable, age, gender, marriage status, educational background and  
18  
19  
20 183 years of work experience as explanatory variables. After matching, a set of 960  
21  
22 184 cases was created, with 325 ethnic minority and 635 Han healthcare professionals.  
23  
24  
25 185 The matched set was used to identify the factors associated with WPV in hospitals  
26  
27 186 using logistics regression. Since the fact that the proportion of male and female  
28  
29  
30 187 was almost 1:3, we have also conducted logistics regression stratified by gender.

31  
32 188 The data were entered using Epidata 3.1 and analyzed using IBM SPSS Statistics  
33  
34  
35 189 22.0. The significance level was set at 0.05.

### 36 37 38 190 *2.5 Ethic approval*

39  
40 191 This study was reviewed and approved by the Research Ethics Committee of  
41  
42  
43 192 Harbin Medical University and the investigation hospital (Project Identification  
44  
45  
46 193 Code: HMUIRB20160014). All the respondents were provided with informed  
47  
48 194 consent, which described the purpose and method of data collection and kept the  
49  
50  
51 195 data confidential.

### 52 53 196 *2.6 Patient and public involvement*

54  
55  
56 197 No patient involved.

## 57 58 198 **3. Results**

199 *3.1 Demographic characteristics*

200 Table 1 shows the demographic details of the 509 men and 1,527 women who  
 201 participated in the study. Around 84% of respondents were of “Han ethnicity”,  
 202 while 16% were ethnic minorities. A majority of respondents were nurses (42.7%)  
 203 and physicians (31.5%), 12.5% were medical technology workers, the rest (11.6%)  
 204 held other positions. Most of the respondents (70.2%) worked in rotational shifts,  
 205 and 74.2% engaged in overtime work (from 6 pm to 7 am the next day), such as  
 206 overtime or emergency consultation. Over half reported high or extremely high  
 207 levels of anxiety regarding WPV (58.9%) and participated in anti-violence training  
 208 (67.5%). As for the prevalence of WPV, 43.7% of the respondents reported that  
 209 they have experienced psychological violence, while 5.4% reported physical  
 210 violence.

211 **Table1. Demographic information and the prevalence of workplace violence**

|                       | N    | %     |
|-----------------------|------|-------|
| <b>Gender</b>         |      |       |
| Male                  | 509  | 25.0% |
| Female                | 1527 | 75.0% |
| <b>Age</b>            |      |       |
| ≤30                   | 940  | 46.2% |
| 31–45                 | 789  | 38.8% |
| ≥46                   | 207  | 15.1% |
| <b>Marital status</b> |      |       |

---

|                                 |      |       |
|---------------------------------|------|-------|
| Single                          | 603  | 29.6% |
| Married                         | 1389 | 68.2% |
| Divorced/widowed                | 44   | 2.2%  |
| <b>Education background</b>     |      |       |
| College graduates               | 448  | 22.0% |
| Bachelor                        | 1207 | 59.3% |
| Master's and above              | 381  | 18.7% |
| <b>Ethnicity</b>                |      |       |
| Han                             | 1711 | 84.0% |
| Minority                        | 325  | 16.0% |
| <b>Years of work experience</b> |      |       |
| 1-5                             | 570  | 28.0% |
| 6-10                            | 548  | 26.9% |
| 11-20                           | 413  | 20.3% |
| >20                             | 505  | 24.8% |
| <b>Profession</b>               |      |       |
| Physician                       | 624  | 31.5% |
| Nurse                           | 869  | 42.7% |
| Medical technology              | 255  | 12.5% |
| Others                          | 236  | 11.6% |
| <b>Work in shift</b>            |      |       |

---

|    |                                |      |       |
|----|--------------------------------|------|-------|
| 1  |                                |      |       |
| 2  |                                |      |       |
| 3  |                                |      |       |
| 4  | Yes                            | 1429 | 70.2  |
| 5  |                                |      |       |
| 6  | No                             | 607  | 29.8  |
| 7  |                                |      |       |
| 8  |                                |      |       |
| 9  | <b>Overtime duty call work</b> |      |       |
| 10 |                                |      |       |
| 11 | <b>(6 pm-7am)</b>              |      |       |
| 12 |                                |      |       |
| 13 |                                |      |       |
| 14 | Yes                            | 1510 | 74.2% |
| 15 |                                |      |       |
| 16 | No                             | 526  | 25.8% |
| 17 |                                |      |       |
| 18 |                                |      |       |
| 19 | <b>Anxiety level</b>           |      |       |
| 20 |                                |      |       |
| 21 |                                |      |       |
| 22 | Never                          | 103  | 5.1%  |
| 23 |                                |      |       |
| 24 | Low                            | 219  | 10.8% |
| 25 |                                |      |       |
| 26 | Moderate                       | 513  | 25.2% |
| 27 |                                |      |       |
| 28 | High                           | 360  | 17.7% |
| 29 |                                |      |       |
| 30 | Extremely high                 | 841  | 41.2% |
| 31 |                                |      |       |
| 32 |                                |      |       |
| 33 |                                |      |       |
| 34 |                                |      |       |
| 35 | <b>Anti-violence training</b>  |      |       |
| 36 |                                |      |       |
| 37 | Yes                            | 1374 | 67.5% |
| 38 |                                |      |       |
| 39 | No                             | 662  | 32.5% |
| 40 |                                |      |       |
| 41 |                                |      |       |
| 42 |                                |      |       |
| 43 | <b>Physical violence</b>       |      |       |
| 44 |                                |      |       |
| 45 | Yes                            | 110  | 5.4%  |
| 46 |                                |      |       |
| 47 | No                             | 1926 | 94.5% |
| 48 |                                |      |       |
| 49 |                                |      |       |
| 50 |                                |      |       |
| 51 | <b>Psychological violence</b>  |      |       |
| 52 |                                |      |       |
| 53 | Yes                            | 889  | 43.7% |
| 54 |                                |      |       |
| 55 | No                             | 1147 | 56.3% |
| 56 |                                |      |       |
| 57 |                                |      |       |

212 *3.2 Influencing factors*

1  
2  
3  
4 213 Table 2 shows the results of the logistic regression analysis of physical and  
5  
6  
7 214 psychological violence using the matched set (unstratified and stratified by  
8  
9 215 gender), including P-values, odds ratios (OR) and 95% confidence intervals  
10  
11 216 (95%CI). The unstratified results showed that female respondents had lower odds  
12  
13  
14 217 of experiencing physical violence than male did (OR = 0.287;  $P = 0.000$ ).  
15  
16  
17 218 Respondents with anxiety level towards WPV had higher odds of physical violence  
18  
19 219 (OR = 1.875;  $P = 0.000$ ). After stratified by gender, the results showed that the  
20  
21  
22 220 educational background of masters and above(OR=7.485  $P = 0.026$ ), ethnic  
23  
24 221 minority(OR=3.312  $P = 0.030$ ), anxiety level towards WPV(OR=2.456  $P = 0.003$ )  
25  
26  
27 222 were the risk factors of physical violence for males, while only anxiety level  
28  
29  
30 223 towards WPV(OR=1.838  $P = 0.008$ ) was the risk factor of physical violence for  
31  
32  
33 224 females.

34  
35 225 As for psychological violence, minority medical workers had higher odds of  
36  
37 226 experiencing it than did workers of Han ethnicity (OR = 1.542;  $P = 0.003$ ).  
38  
39  
40 227 Engaging in overtime work from 6 pm to 7 am the following day was also a risk  
41  
42  
43 228 factor of psychological violence (OR = 1.403;  $P = 0.036$ ). Anxiety level about  
44  
45  
46 229 WPV was also negatively associated with psychological violence (OR=1.543;  $P =$   
47  
48 230 0.000). When stratified by gender, females who are ethnic minorities  
49  
50  
51 231 (OR=1.711;  $P = 0.001$ )were more likely to suffer psychological violence, while  
52  
53  
54 232 anti-violence training (OR=0.713;  $P = 0.042$ ) was the positively associated with  
55  
56 233 psychological violence; both males (OR=1.483;  $P = 0.003$ )and females  
57  
58 234 (OR=1.508;  $P = 0.000$ ) with higher anxiety level towards WPV suffered more  
59  
60



1  
2  
3  
4  
5  
6  
7  
8  
9  
10  
11  
12  
13  
14  
15  
16  
17  
18  
19  
20  
21  
22  
23  
24  
25  
26  
27  
28  
29  
30  
31  
32  
33  
34  
35  
36  
37  
38  
39  
40  
41  
42  
43  
44  
45  
46  
47  
48  
49  
50  
51  
52  
53  
54  
55  
56  
57  
58  
59  
60

235 psychological violence.

For peer review only

236

Table 2. Results of logistic regression of physical and psychological violence

| Variable                      | Physical Violence |             |       |            |               |       |        |              |       | Psychological Violence |             |       |            |             |       |        |             |       |   |
|-------------------------------|-------------------|-------------|-------|------------|---------------|-------|--------|--------------|-------|------------------------|-------------|-------|------------|-------------|-------|--------|-------------|-------|---|
|                               | Unstratified      |             |       | Stratified |               |       |        |              |       | Unstratified           |             |       | Stratified |             |       |        |             |       |   |
|                               |                   |             |       | Male       |               |       | Female |              |       |                        |             |       | Male       |             |       | Female |             |       |   |
|                               | OR                | 95% CI      | P     | OR         | 95% CI        | P     | OR     | 95% CI       | P     | OR                     | 95% CI      | P     | OR         | 95% CI      | P     | OR     | 95% CI      | P     |   |
| <b>Gender</b>                 |                   |             |       |            |               |       |        |              |       |                        |             |       |            |             |       |        |             |       |   |
| Male                          | -                 | -           | -     | -          | -             | -     | -      | -            | -     | -                      | -           | -     | -          | -           | -     | -      | -           | -     | - |
| Female                        | 0.287             | 0.151-0.546 | 0.000 | -          | -             | -     | -      | -            | -     | 0.998                  | 0.711-1.400 | 0.990 | -          | -           | -     | -      | -           | -     | - |
| <b>Age (years)</b>            |                   |             |       |            |               |       |        |              |       |                        |             |       |            |             |       |        |             |       |   |
| ≤30                           | -                 | -           | -     | -          | -             | -     | -      | -            | -     | -                      | -           | -     | -          | -           | -     | -      | -           | -     | - |
| 31-45                         | 1.263             | 0.265-6.013 | 0.770 | 3.250      | 0.066-160.962 | 0.554 | 0.761  | 0.091-6.359  | 0.801 | 1.107                  | 0.551-2.227 | 0.775 | 0.772      | 0.190-3.141 | 0.718 | 1.455  | 0.636-3.332 | 0.374 |   |
| ≥46                           | 1.436             | 0.430-4.801 | 0.557 | 0.515      | 0.014-19.395  | 0.720 | 2.406  | 0.451-12.843 | 0.304 | 0.803                  | 0.455-1.418 | 0.450 | 0.492      | 0.160-1.506 | 0.214 | 1.099  | 0.554-2.182 | 0.787 |   |
| <b>Marital status</b>         |                   |             |       |            |               |       |        |              |       |                        |             |       |            |             |       |        |             |       |   |
| Single                        | -                 | -           | -     | -          | -             | -     | -      | -            | -     | -                      | -           | -     | -          | -           | -     | -      | -           | -     | - |
| Married                       | 0.466             | 0.078-2.771 | 0.401 | 0.099      | 0.005-1.861   | 0.122 | 0.965  | 0.085-10.921 | 0.977 | 0.850                  | 0.296-2.442 | 0.762 | 0.572      | 0.052-6.347 | 0.649 | 0.851  | 0.260-2.779 | 0.789 |   |
| Divorced/widowed              | 0.463             | 0.089-2.408 | 0.360 | 0.320      | 0.021-4.836   | 0.411 | 0.573  | 0.061-5.416  | 0.627 | 0.949                  | 0.344-2.618 | 0.920 | 0.776      | 0.075-7.991 | 0.831 | 0.883  | 0.284-2.749 | 0.883 |   |
| <b>Educational background</b> |                   |             |       |            |               |       |        |              |       |                        |             |       |            |             |       |        |             |       |   |
| College graduates             | -                 | -           | -     | -          | -             | -     | -      | -            | -     | -                      | -           | -     | -          | -           | -     | -      | -           | -     | - |
| Bachelors                     | 0.981             | 0.349-2.751 | 0.970 | 0.921      | 0.098-8.696   | 0.943 | 0.690  | 0.208-2.281  | 0.542 | 0.923                  | 0.580-1.469 | 0.735 | 1.184      | 0.496-2.826 | 0.704 | 0.884  | 0.503-1.554 | 0.668 |   |
| Masters and above             | 1.358             | 0.546-3.378 | 0.510 | 7.485      | 1.272-44.041  | 0.026 | 0.451  | 0.147-1.381  | 0.163 | 1.202                  | 0.792-1.825 | 0.387 | 1.156      | 0.546-2.448 | 0.705 | 1.234  | 0.738-2.065 | 0.423 |   |
| <b>Ethnicity</b>              |                   |             |       |            |               |       |        |              |       |                        |             |       |            |             |       |        |             |       |   |

|    |                                 |       |             |       |       |              |       |       |             |       |       |             |       |       |             |       |       |             |       |
|----|---------------------------------|-------|-------------|-------|-------|--------------|-------|-------|-------------|-------|-------|-------------|-------|-------|-------------|-------|-------|-------------|-------|
| 1  |                                 |       |             |       |       |              |       |       |             |       |       |             |       |       |             |       |       |             |       |
| 2  |                                 |       |             |       |       |              |       |       |             |       |       |             |       |       |             |       |       |             |       |
| 3  |                                 |       |             |       |       |              |       |       |             |       |       |             |       |       |             |       |       |             |       |
| 4  |                                 |       |             |       |       |              |       |       |             |       |       |             |       |       |             |       |       |             |       |
| 5  |                                 |       |             |       |       |              |       |       |             |       |       |             |       |       |             |       |       |             |       |
| 6  | Han                             | -     | -           | -     | -     | -            | -     | -     | -           | -     | -     | -           | -     | -     | -           | -     | -     | -           | -     |
| 7  |                                 |       |             |       |       |              |       |       |             |       |       |             |       |       |             |       |       |             |       |
| 8  | Minority                        | 1.574 | 0.863-2.869 | 0.139 | 3.312 | 1.121-9.788  | 0.030 | 1.182 | 0.531-2.632 | 0.683 | 1.542 | 1.161-2.048 | 0.003 | 1.069 | 0.563-2.033 | 0.838 | 1.711 | 1.240-2.362 | 0.001 |
| 9  |                                 |       |             |       |       |              |       |       |             |       |       |             |       |       |             |       |       |             |       |
| 10 |                                 |       |             |       |       |              |       |       |             |       |       |             |       |       |             |       |       |             |       |
| 11 | <b>Years of work experience</b> |       |             |       |       |              |       |       |             |       |       |             |       |       |             |       |       |             |       |
| 12 |                                 |       |             |       |       |              |       |       |             |       |       |             |       |       |             |       |       |             |       |
| 13 | 1-5                             | -     | -           | -     | -     | -            | -     | -     | -           | -     | -     | -           | -     | -     | -           | -     | -     | -           | -     |
| 14 |                                 |       |             |       |       |              |       |       |             |       |       |             |       |       |             |       |       |             |       |
| 15 |                                 |       |             |       |       |              |       |       |             |       |       |             |       |       |             |       |       |             |       |
| 16 | 6-10                            | 0.818 | 0.202-3.309 | 0.778 | 1.003 | 0.020-51.346 | 0.999 | 0.989 | 0.175-5.591 | 0.990 | 0.537 | 0.282-1.023 | 0.059 | 0.595 | 0.158-2.237 | 0.442 | 0.510 | 0.241-1.083 | 0.080 |
| 17 |                                 |       |             |       |       |              |       |       |             |       |       |             |       |       |             |       |       |             |       |
| 18 |                                 |       |             |       |       |              |       |       |             |       |       |             |       |       |             |       |       |             |       |
| 19 | 11-20                           | 0.498 | 0.138-1.805 | 0.289 | 0.769 | 0.017-35.107 | 0.893 | 0.513 | 0.104-2.531 | 0.412 | 0.718 | 0.402-1.284 | 0.265 | 0.618 | 0.188-2.029 | 0.428 | 0.716 | 0.361-1.421 | 0.339 |
| 20 |                                 |       |             |       |       |              |       |       |             |       |       |             |       |       |             |       |       |             |       |
| 21 | >20                             | 0.799 | 0.271-2.361 | 0.685 | 1.368 | 0.035-53.891 | 0.867 | 0.846 | 0.252-2.840 | 0.786 | 1.336 | 0.800-2.231 | 0.268 | 1.438 | 0.460-4.496 | 0.533 | 1.236 | 0.689-2.219 | 0.477 |
| 22 |                                 |       |             |       |       |              |       |       |             |       |       |             |       |       |             |       |       |             |       |
| 23 |                                 |       |             |       |       |              |       |       |             |       |       |             |       |       |             |       |       |             |       |
| 24 | <b>Work in shift</b>            |       |             |       |       |              |       |       |             |       |       |             |       |       |             |       |       |             |       |
| 25 |                                 |       |             |       |       |              |       |       |             |       |       |             |       |       |             |       |       |             |       |
| 26 | Yes                             | 1.162 | 0.575-2.350 | 0.676 | 0.869 | 0.257-2.944  | 0.822 | 1.506 | 0.589-3.853 | 0.393 | 1.171 | 0.851-1.610 | 0.333 | 1.283 | 0.653-2.520 | 0.469 | 1.124 | 0.777-1.625 | 0.535 |
| 27 |                                 |       |             |       |       |              |       |       |             |       |       |             |       |       |             |       |       |             |       |
| 28 |                                 |       |             |       |       |              |       |       |             |       |       |             |       |       |             |       |       |             |       |
| 29 | No                              | -     | -           | -     | -     | -            | -     | -     | -           | -     | -     | -           | -     | -     | -           | -     | -     | -           | -     |
| 30 |                                 |       |             |       |       |              |       |       |             |       |       |             |       |       |             |       |       |             |       |
| 31 |                                 |       |             |       |       |              |       |       |             |       |       |             |       |       |             |       |       |             |       |
| 32 | <b>Overtime duty call work</b>  |       |             |       |       |              |       |       |             |       |       |             |       |       |             |       |       |             |       |
| 33 |                                 |       |             |       |       |              |       |       |             |       |       |             |       |       |             |       |       |             |       |
| 34 | <b>(6pm-7am)</b>                |       |             |       |       |              |       |       |             |       |       |             |       |       |             |       |       |             |       |
| 35 |                                 |       |             |       |       |              |       |       |             |       |       |             |       |       |             |       |       |             |       |
| 36 |                                 |       |             |       |       |              |       |       |             |       |       |             |       |       |             |       |       |             |       |
| 37 | Yes                             | 0.875 | 0.430-1.781 | 0.713 | 1.343 | 0.308-5.856  | 0.695 | 0.734 | 0.31301.724 | 0.478 | 1.403 | 1.022-1.925 | 0.036 | 1.263 | 0.573-2.782 | 0.562 | 1.412 | 0.997-2.000 | 0.052 |
| 38 |                                 |       |             |       |       |              |       |       |             |       |       |             |       |       |             |       |       |             |       |
| 39 |                                 |       |             |       |       |              |       |       |             |       |       |             |       |       |             |       |       |             |       |
| 40 | No                              | -     | -           | -     | -     | -            | -     | -     | -           | -     | -     | -           | -     | -     | -           | -     | -     | -           | -     |
| 41 |                                 |       |             |       |       |              |       |       |             |       |       |             |       |       |             |       |       |             |       |
| 42 | <b>Anxiety level</b>            | 1.875 | 1.339-2.624 | 0.000 | 2.456 | 1.348-4.475  | 0.003 | 1.838 | 1.172-2.884 | 0.008 | 1.500 | 1.326-1.697 | 0.000 | 1.483 | 1.144-1.921 | 0.003 | 1.508 | 1.307-1.739 | 0.000 |
| 43 |                                 |       |             |       |       |              |       |       |             |       |       |             |       |       |             |       |       |             |       |
| 44 |                                 |       |             |       |       |              |       |       |             |       |       |             |       |       |             |       |       |             |       |
| 45 | <b>Anti-violence training</b>   |       |             |       |       |              |       |       |             |       |       |             |       |       |             |       |       |             |       |
| 46 |                                 |       |             |       |       |              |       |       |             |       |       |             |       |       |             |       |       |             |       |
| 47 | Yes                             | 1.253 | 0.647-2.426 | 0.504 | 3.288 | 0.867-12.473 | 0.080 | 0.886 | 0.388-2.022 | 0.773 | 0.790 | 0.592-1.055 | 0.111 | 1.090 | 0.561-2.115 | 0.800 | 0.713 | 0.514-0.989 | 0.042 |
| 48 |                                 |       |             |       |       |              |       |       |             |       |       |             |       |       |             |       |       |             |       |
| 49 |                                 |       |             |       |       |              |       |       |             |       |       |             |       |       |             |       |       |             |       |
| 50 | No                              | -     | -           | -     | -     | -            | -     | -     | -           | -     | -     | -           | -     | -     | -           | -     | -     | -           | -     |
| 51 |                                 |       |             |       |       |              |       |       |             |       |       |             |       |       |             |       |       |             |       |

237 OR: odds ratio; CI: Confidence interval.

238 *3.3 Participants' response to WPV*

239 Table 3 shows the different response to psychological/physical violence  
 240 between Han and ethnic minority healthcare professionals. More Han healthcare  
 241 professionals ordered perpetrators to stop and reported to superiors than ethnic  
 242 minorities when psychological violence happened, and the difference shows  
 243 statistical significance ( $p < 0.05$ ). As for the physical violence, compared to ethnic  
 244 minority, more Han healthcare professionals chose to respond in all ways except  
 245 pretending nothing happened. However, none of the difference is statistically  
 246 significant.

247 **Table 3. Response to psychological and physical violence**

|                                    | Psychological violence |       |                        |       | Physical Violence |       |                       |       |
|------------------------------------|------------------------|-------|------------------------|-------|-------------------|-------|-----------------------|-------|
|                                    | Han(N=727)             |       | Ethnic minority(N=162) |       | Han(N=88)         |       | Ethnic minority(N=22) |       |
|                                    | n                      | %     | n                      | %     | n                 | %     | n                     | %     |
| <b>Pretend nothing happened</b>    | 216                    | 29.71 | 49                     | 30.25 | 6                 | 6.82  | 4                     | 18.18 |
| <b>Order to stop*</b>              | 324                    | 44.57 | 55                     | 33.95 | 27                | 30.68 | 3                     | 13.64 |
| <b>Talk to families or friends</b> | 474                    | 65.20 | 114                    | 70.37 | 21                | 23.86 | 4                     | 18.18 |
| <b>Psychological counseling</b>    | 70                     | 9.63  | 23                     | 14.20 | 9                 | 10.23 | 2                     | 9.09  |
| <b>Talk to colleague</b>           | 631                    | 86.80 | 131                    | 80.86 | 33                | 37.50 | 6                     | 27.27 |
| <b>Change department</b>           | 47                     | 6.46  | 13                     | 8.02  | 4                 | 4.55  | 0                     | 0.00  |
| <b>Report to superiors*</b>        | 469                    | 64.51 | 82                     | 50.62 | 31                | 35.23 | 6                     | 27.27 |
| <b>Charge perpetrators</b>         | 28                     | 3.85  | 4                      | 2.47  | 5                 | 5.68  | 0                     | 0.00  |

248 \*: Statistically significant in psychological violence

### 249 *3.4 Anti-violence training measures and content*

250 Table 4 has shown the anti-violence training measures and content expected by  
 251 healthcare professionals. Lecture is the most expected measures of training both  
 252 by Han (54.13%) and ethnic minority (52.62%). Pre-job training is expected by  
 253 half of ethnic minority healthcare professionals, which is slightly higher than that  
 254 proportion in Han (43.89%). Wall newspaper and poster is the least popular  
 255 measure both by Hans and ethnic minorities. As for the training content, more  
 256 than 70% Han and ethnic minority participants expects identification of WPV  
 257 signs and escaping training. Compared to Han, ethnic minority healthcare  
 258 professionals are more interested in force skills and self-defense, and these  
 259 differences show statistical significance( $p<0.05$ ).

260 **Table 4. Expected measures and contents of anti-violence training**

|                                   | Han |        | Ethnic minority |        |
|-----------------------------------|-----|--------|-----------------|--------|
|                                   | n   | %      | n               | %      |
| <b>Expected training measures</b> |     |        |                 |        |
| Leaflets                          | 680 | 39.74% | 125             | 38.46% |
| Video                             | 759 | 44.36% | 145             | 44.62% |
| Lectures                          | 926 | 54.12% | 171             | 52.62% |
| Wall newspaper, poster            | 435 | 25.42% | 77              | 23.69% |
| Employee handbooks                | 507 | 29.63% | 93              | 28.62% |
| Pre-job training                  | 751 | 43.89% | 163             | 50.15% |

### Expected training content

|                               |      |        |     |        |
|-------------------------------|------|--------|-----|--------|
| WPV cognition                 | 891  | 52.07% | 177 | 54.46% |
| Identification of WPV signs   | 1242 | 72.59% | 234 | 72.00% |
| Language skills               | 1162 | 67.91% | 232 | 71.38% |
| Force skills*                 | 815  | 47.63% | 182 | 56.00% |
| Relevant laws and regulations | 1113 | 65.05% | 223 | 68.62% |
| Escaping training             | 1235 | 72.18% | 245 | 75.38% |
| Self-defense*                 | 1227 | 71.71% | 257 | 79.08% |

261

### 262 *3.5 Evaluation of the usefulness of WPV interventions*

263 As for the evaluation of interventions, there is no significant difference between  
 264 Han and ethnic minority healthcare professionals. Participants hold that security  
 265 measures are the most useful ways to prevent WPV. The following are improving  
 266 the environment and anti-violence training. More than 40% consider patient  
 267 examination and changing the time of shift as useless measures. There are few  
 268 differences when stratified by ethnicity. More Han healthcare workers look down  
 269 on the usefulness of protective equipment, while ethnic minority participants  
 270 undervalue patient examination and anti-violence training. However, none of this  
 271 difference between Han and ethnic minority is statistically significant. (Table 5)

272

**Table 5. Evaluation of the usefulness of WPV interventions**

|                                                                  | All participants |       | Han |       | Ethnic minority |       |
|------------------------------------------------------------------|------------------|-------|-----|-------|-----------------|-------|
|                                                                  | n                | %     | n   | %     | n               | %     |
| <b>Improve the environment (e.g. enhance lighting)</b>           |                  |       |     |       |                 |       |
| Very useful                                                      | 715              | 35.12 | 611 | 35.71 | 104             | 32.00 |
| Somewhat useful                                                  | 945              | 46.41 | 784 | 45.82 | 161             | 49.54 |
| Useless                                                          | 376              | 18.47 | 316 | 18.47 | 60              | 18.46 |
| <b>Restrict non-staff access</b>                                 |                  |       |     |       |                 |       |
| Very useful                                                      | 591              | 29.03 | 513 | 29.98 | 78              | 24.00 |
| Somewhat useful                                                  | 778              | 38.21 | 638 | 37.29 | 140             | 43.08 |
| Useless                                                          | 667              | 32.76 | 560 | 32.73 | 107             | 32.92 |
| <b>Patient examination (e.g. history of committing violence)</b> |                  |       |     |       |                 |       |
| Very useful                                                      | 498              | 24.46 | 429 | 25.07 | 69              | 21.23 |
| Somewhat useful                                                  | 698              | 34.28 | 586 | 34.25 | 112             | 34.46 |
| Useless                                                          | 840              | 41.26 | 696 | 40.68 | 144             | 44.31 |
| <b>Increase manpower</b>                                         |                  |       |     |       |                 |       |
| Very useful                                                      | 667              | 32.76 | 571 | 33.37 | 96              | 29.54 |
| Somewhat useful                                                  | 796              | 39.10 | 663 | 38.75 | 133             | 40.92 |
| Useless                                                          | 573              | 28.14 | 477 | 27.88 | 96              | 29.54 |
| <b>Protective equipment</b>                                      |                  |       |     |       |                 |       |
| Very useful                                                      | 610              | 29.96 | 522 | 30.51 | 88              | 27.08 |
| Somewhat useful                                                  | 738              | 36.25 | 625 | 36.53 | 113             | 34.77 |

|                                 |     |       |     |       |     |       |
|---------------------------------|-----|-------|-----|-------|-----|-------|
| Useless                         | 688 | 33.79 | 564 | 32.96 | 124 | 38.15 |
| <b>Change the time of shift</b> |     |       |     |       |     |       |
| Very useful                     | 470 | 23.08 | 411 | 24.02 | 59  | 18.15 |
| Somewhat useful                 | 699 | 34.33 | 578 | 33.78 | 121 | 37.23 |
| Useless                         | 867 | 42.58 | 722 | 42.20 | 145 | 44.62 |
| <b>Avoid working alone</b>      |     |       |     |       |     |       |
| Very useful                     | 659 | 32.37 | 568 | 33.20 | 91  | 28.00 |
| Somewhat useful                 | 636 | 31.24 | 526 | 30.74 | 110 | 33.85 |
| Useless                         | 741 | 36.39 | 617 | 36.06 | 124 | 38.15 |
| <b>Anti-violence training</b>   |     |       |     |       |     |       |
| Very useful                     | 785 | 38.56 | 675 | 39.45 | 110 | 33.85 |
| Somewhat useful                 | 800 | 39.29 | 672 | 39.28 | 128 | 39.38 |
| Useless                         | 449 | 22.05 | 362 | 21.16 | 87  | 26.77 |
| <b>Security measures</b>        |     |       |     |       |     |       |
| Very useful                     | 899 | 44.16 | 762 | 44.54 | 137 | 42.15 |
| Somewhat useful                 | 932 | 45.78 | 779 | 45.53 | 153 | 47.08 |
| Useless                         | 205 | 10.07 | 170 | 9.94  | 35  | 10.77 |

273

274 **4.Discussion**

275 This study examined the prevalence, influence factors, and response of WPV in a  
 276 hospital where located in multi- ethnicity area of China. The percentage of medical  
 277 workers of minority ethnicity was substantially higher than what has been



1  
2  
3  
4 278 reported in studies conducted in eastern and central China (2.41–7.95%)<sup>10-12</sup>. The  
5  
6  
7 279 result shows that the prevalence of physical and psychological violence in our  
8  
9 280 study are lower than what has been found in areas Han people mainly lives in <sup>2-7</sup>  
10  
11 281 <sup>13 14</sup>. The results of logistics regression indicated that ethnic minority healthcare  
12  
13  
14 282 professionals maybe more likely to suffer psychological violence. After stratified  
15  
16  
17 283 by gender, males who are ethnic minorities were more likely to suffer physical  
18  
19 284 violence, while females psychological violence. This discrepancy may be due to the  
20  
21  
22 285 proportion of males and females. Some studies from other countries or regions  
23  
24  
25 286 showed that ethnic minority healthcare workers were less likely to experience  
26  
27 287 WPV when comparing to the majority (Whites)<sup>15 16</sup>, while some studies held the  
28  
29  
30 288 opposite conclusion that ethnic minority healthcare professionals were more  
31  
32  
33 289 vulnerable in suffering workplace bullying, verbal abuse, physical violence, etc. <sup>17-</sup>  
34  
35 290 <sup>21</sup> However, due to the huge difference of investigation background and  
36  
37  
38 291 participants' characteristics, these studies couldn't be compared with our study.  
39  
40 292 We speculate several reasons for this result. First, study shows that there is  
41  
42  
43 293 behavioural difference between Han and ethnic minority, culture and religious  
44  
45 294 beliefs may be a key factor to explaining <sup>22</sup>. Second, our study shows that when  
46  
47  
48 295 facing WPV, compared with Han, ethnic minority healthcare professionals may be  
49  
50  
51 296 more likely to tolerate, which may lead to more violence. Third, the language from  
52  
53 297 difference linguistic culture may hamper the doctor-patient communication, thus  
54  
55  
56 298 lead to violence<sup>23</sup>.

57  
58 299 Respondents who engaged in overtime duty call work from 6 pm to 7 am had  
59  
60

1  
2  
3  
4 300 greater odds of experiencing psychological violence. This is a new finding in our  
5  
6 301 study, which has been ignored in most research in China. We speculate several  
7  
8  
9 302 reasons for this finding. First, our definition of overtime work might have captured  
10  
11 303 individuals handling urgent issues. The staff working therein are more likely to  
12  
13  
14 304 experience higher levels of frustration, distress, cognitive impairment or arousal<sup>24</sup>  
15  
16  
17 305 <sup>25</sup>, which is similar with the WPV high-risk department — emergency department.  
18  
19 306 Second, healthcare professionals would face more aggressive situations such as  
20  
21  
22 307 drunk patients or companions and traumatic patients caused by fighting. Third,  
23  
24  
25 308 since the on-call work is not during the general working time, there are less  
26  
27  
28 309 colleagues and guards. We suggest that more effective measures should be  
29  
30  
31 310 adopted to protect healthcare professionals who engage duty call beyond general  
32  
33  
34 311 working time. Future study should investigate this phenomenon in Han mainly  
35  
36  
37 312 living area.

38 313 The result of logistics regression shows that males have higher odds of  
39  
40  
41 314 experiencing physical violence, which is similar to the WPV studies conducted in  
42  
43  
44 315 the areas that Han mainly lives in<sup>6 14 26</sup>. In other countries, some studies came to  
45  
46  
47 316 the same thing<sup>27-30</sup>, while some studies have reported that women are more  
48  
49  
50 317 vulnerable to physical violence<sup>31</sup>. This discrepancy can be attributed to the  
51  
52  
53 318 different study backgrounds<sup>32</sup>. In many countries, beliefs, ethics, or moral  
54  
55  
56 319 principles serve as guidance for public behavior. For instance, in some Arab  
57  
58  
59 320 countries, being a male is a risk factor of experiencing WPV partly because of  
60  
321 321 cultural norms that reject disrespect of females<sup>30</sup>. Consistent with other

1  
2  
3  
4 322 researches<sup>6 14</sup> conducted in the areas that Han mainly lives in , our study shows  
5  
6 323 that higher anxiety levels regarding WPV increased the odds of experiencing WPV  
7  
8  
9 324 in multi-ethnicity area, which may because WPV can lead to adaptive behavior that  
10  
11 325 might create opportunities for the violence reoccurred<sup>33</sup>.

12  
13  
14 326 Compared to Han, more ethnic minority healthcare professionals pretend  
15  
16 327 nothing happened after suffering physical violence. Also, they may less likely to  
17  
18 328 talk with surroundings about these events, or to report to their leaders, or to use  
19  
20 329 legal methods. The reason why we think there is no statistical significance in this  
21  
22 330 result is the number of cases physical violence happened. Despite this, we  
23  
24 331 speculate that this may due to the cultural belief of ethnic minority makes them  
25  
26 332 silent. Study has proved that talking with surroundings about their WPV is helpful  
27  
28 333 to release their tension or anxiety gain from WPV<sup>34</sup>. Since the anxiety towards  
29  
30 334 WPV is a risk factor to WPV, more social support from individual level, such as  
31  
32 335 friends, families, and colleagues, should be provided to help ethnic minority  
33  
34 336 healthcare professionals managing violence through diverse methods instead of  
35  
36 337 tolerating by themselves. Study has shown that in the environment that encourage  
37  
38 338 to report WPV, more incidents of WPV were reported and healthcare workers  
39  
40 339 gained better awareness of risk for violence, as well as how to avoid potential  
41  
42 340 danger, and how to manage aggressive customers<sup>35</sup>. An adequate WPV reporting  
43  
44 341 system should be established to encourage ethnic minority healthcare  
45  
46 342 professionals to report their WPV experience.

47  
48  
49 343 It seems that both Han and ethnic minority healthcare professionals are less  
50  
51  
52  
53  
54  
55  
56  
57  
58  
59  
60

1  
2  
3  
4 344 interested in the textual anti-violence training measures (leaflets, poster, wall  
5  
6  
7 345 newspaper, employee handbook). Although printed materials could summarize  
8  
9 346 content and be learned repeatedly, the lack of practice details makes it less  
10  
11 347 effective<sup>36</sup>. Video holds the advantages such as attractiveness, convenience, clarity  
12  
13  
14 348 of demonstration, superior cost-effectiveness and easy to apply, while lectures  
15  
16  
17 349 contain variety of lively styles such as group interaction and scenario simulation,  
18  
19  
20 350 which makes them more popular<sup>37 38</sup>. Future study should compare the effect of  
21  
22 351 these measures. Pre-job training is more needed by ethnic minority healthcare  
23  
24 352 workers, which maybe that it could help them to adapt to work environment  
25  
26  
27 353 better and faster. As for the training content, ethnic minority healthcare  
28  
29  
30 354 professionals are more interested in tough measures. Since ethnic minorities are  
31  
32 355 more likely to suffer psychological violence, they may perceive more threat thus  
33  
34  
35 356 give rise to the tendency of handle violence by force<sup>39 40</sup>.

37  
38 357 Our finding indicated that there is no much difference in evaluation of  
39  
40 358 usefulness of WPV intervention between Han and ethnic minority. Security  
41  
42  
43 359 measure is regarded as the most useful intervention of WPV. China has enacted  
44  
45  
46 360 ‘Guidance on strengthening the security and protection system construction in  
47  
48 361 hospitals’ in 2013 and ‘Opinions on strictly punishing medical related crimes and  
49  
50  
51 362 maintaining the medical order’ in 2017 to strengthen security of hospital.  
52  
53  
54 363 However, since these policies served as instructions rather than mandatory  
55  
56 364 regulations, insufficient resource has constrained the implementation in all  
57  
58  
59 365 hospitals. Security measures are not only an intervention that could prevent  
60

1  
2  
3  
4 366 healthcare professionals from WPV, but also may enhance the sense of safety as a  
5  
6  
7 367 kind of organizational support. Hospitals should implement specific scale of  
8  
9  
10 368 security measures according to actual situation. Most participants consider anti-  
11  
12 369 violence training as useful. Although it could increase the knowledge and boost  
13  
14 370 confidence, the effect could not reduce of WPV incidents for long-term<sup>41</sup>. We  
15  
16  
17 371 suggest that it's essential to make a complete and periodic curriculum for  
18  
19 372 repetitive training. Improving environment, such as enhancing lighting and install  
20  
21  
22 373 cameras, is be considered as useful measure. Previous study has shown that  
23  
24  
25 374 working in a daring environment at night is a risk factor of WPV<sup>42</sup>. Camera  
26  
27 375 installation is required by Occupational Safety and Health Administration  
28  
29  
30 376 (OSHA)<sup>43</sup>, which may be a deterrence for committing violence. Using protective  
31  
32  
33 377 equipment is not a popular intervention. In the period of frequent WPV in China,  
34  
35  
36 378 there are indeed some healthcare workers wearing helmet at work<sup>44</sup>. However,  
37  
38 379 this may lead to a more tense doctor-patient relationship. Participants don't trust  
39  
40  
41 380 patient examination and restriction non-staff access much. Due to big hospital  
42  
43  
44 381 scale and treatment number, there would be numerous patients admitted to  
45  
46  
47 382 hospital. The process of patient examination and restriction of non-staff access  
48  
49  
50 383 would not be serious enough, otherwise the crowded queue and longer waiting  
51  
52  
53 384 time may breed new contradictions. In addition, since there is no system or  
54  
55  
56 385 platform share the patient information between each hospital, it is difficult to  
57  
58  
59 386 verify WPV history strictly. Although previous studies have shown that work shift  
60  
387 is negatively associated with WPV<sup>14 28 30</sup>, changing the time of shift are treated as

1  
2  
3  
4 388 less useful. It may be better to enhance the protection during shift rather than  
5  
6  
7 389 changing the regulation.

## 8 9 390 **5. Limitations**

10  
11 391 This study has a few limitations. First, since the respondents were asked to  
12  
13  
14 392 report WPV that had taken place in the past 12 months, violence might not be  
15  
16  
17 393 adequately reported due to recall bias or reporting bias resulting from shame and  
18  
19  
20 394 stigma. Second, the study exploratively examined the WPV in multi-ethnicity area  
21  
22  
23 395 are but did not conduct in-depth research on the underlying cause by cultural  
24  
25 396 factors. Future, research should investigate the perpetrators or patients,  
26  
27 397 especially explore WPV by qualitative methods.

## 28 29 30 398 **6. Conclusion**

31  
32 399 Our study investigated WPV in a hospital located in multi-ethnicity area. The  
33  
34  
35 400 WPV prevalence reported in our study is lower than that in the areas that Han  
36  
37  
38 401 mainly lives in. Ethnic minority healthcare professionals may be more likely to  
39  
40  
41 402 suffer WPV and they have differences in response to WPV compared to Han.  
42  
43 403 Additionally, we broke through the single focus of existing WPV research and  
44  
45 404 explored WPV from a more comprehensive perspective including prevalence,  
46  
47  
48 405 influencing factors, response to WPV, expected anti-violence training measures  
49  
50  
51 406 and contents, and evaluation of interventions, which may provide a practical  
52  
53 407 reference to hospitals with similar characteristics. More WPV research should be  
54  
55  
56 408 conducted in multi-ethnicity areas from the perspective of perpetrator or patients,  
57  
58  
59 409 especially by qualitative methods.  
60

1  
2  
3  
4 410 **Contributors** : Mingli Jiao, Jingfu Mao and Qunhong Wu contributed to the  
5  
6 411 conception and design of the study. Haonan Jia, Huiying Fang, Yameng Wang,  
7  
8  
9 412 Kexin Jiang, Yuanheng Li, Ying, Wang, Lifen Wei, and Gangyu Zhang contributed to  
10  
11 413 the data collection. Omar Yacouba Ismael, Haonan Jia and Xiaowen Jia contributed  
12  
13  
14 414 to literature search and data quality control. Huiying Fang and Haonan Jia, Ruohui  
15  
16  
17 415 Chen did the statistical analysis and drafted the original manuscript. Mingli Jiao  
18  
19 416 revised the manuscript for important intellectual content. Ruohui Chen, Kexin  
20  
21  
22 417 Jiang and Jingqun Li prepared the manuscript and supplementary material. All  
23  
24  
25 418 authors contributed to data interpretation and rewriting the paper.  
26  
27 419 Haonan Jia, Huiying Fang, Ruohui Chen contributed equally to this work. Mingli  
28  
29  
30 420 Jiao and Jingfu Mao are corresponding author.

#### 31 32 33 421 34 35 422 **Funding**

36  
37 423 This study was funded by the Natural Science Foundation of China (Grant  
38  
39  
40 424 No.71273002, 71473064); New Century Excellent Talents of University from the  
41  
42  
43 425 Ministry of Education, China (Grant No.1252-NCET02); the China Postdoctoral  
44  
45  
46 426 Science Foundation (Grant No.2015M570211, 2016T90181); the Heilongjiang  
47  
48  
49 427 Provincial Association of Social Sciences (Grant No.15058), and the Collaborative  
50  
51  
52 428 Innovation Centre of Social Risks Governance in Health; Think Tank of Public  
53  
54  
55 429 Health Security and Health Reform of Heilongjiang Province.

56 430 **Consent for publication:** Not applicable.

57  
58  
59 431 **Competing interests:** The authors declare that they have no competing interests.  
60

1  
2  
3  
4 432 **Acknowledgements:** We thank the management office and all the participants for  
5  
6 433 data collection.  
7  
8

9 434 **Data sharing statement:** Data are available from the corresponding author and  
10  
11 435 investigation hospital upon reasonable request.  
12  
13

#### 14 436 **Reference**

- 15  
16  
17 437 1. Zhao M, Jiang K, Yang L, et al. The Big Data Research on Violence against Doctors:  
18  
19 438 Based on the Media Report from 2000 to 2015 *Medicine & Philosophy*  
20  
21 439 2017;38(01):89-93.  
22  
23  
24 440 2. Liqun Y, Shoufang J, Xiaoxia T, et al. Analysis of prevalence of workplace violence  
25  
26 441 in staff of two hospitals in Tangshan. *Modern Preventive Medicine*  
27  
28 442 2006;33(2):147-52.  
29  
30  
31 443 3. Jing G, Pei H, Xiaoli Z, et al. The investigation on coping capacity of nursing staff  
32  
33 444 to medical workplace violence. *Chinese Nursing Management*  
34  
35 445 2015;15(6):688-91.  
36  
37  
38 446 4. Lin H, Yan J, Jian W, et al. A survey on effect of workplace violence in hospital on  
39  
40 447 work-related stress of medical staffs. *Chongqing Medicine*  
41  
42 448 2012;41(06):590-92.  
43  
44  
45 449 5. Chen ZH, Wang SY, Jing CX, et al. Prevalence of workplace violence in staff of two  
46  
47 450 hospitals in Guangzhou. *Chinese Journal of Preventive Medicine*  
48  
49 451 2003;37(5):358.  
50  
51  
52 452 6. Liu H, Zhao S, Jiao M, et al. Extent, nature, and risk factors of workplace violence  
53  
54 453 in public tertiary hospitals in China: a cross-sectional survey. *International*  
55  
56  
57  
58  
59  
60



- 1  
2  
3  
4 454 Journal of Environmental Research and Public Health 2015;12(6):6801-17.  
5  
6  
7 455 7. Zhao S, Liu H, Ma H, et al. Coping with Workplace Violence in Healthcare Settings:  
8  
9 456 Social Support and Strategies. International journal of environmental  
10  
11 457 research and public health 2015;12:14429-44.  
12  
13  
14 458 8. Su L. A Study on the Occupational Status and Social Attitudes of Ethnic  
15  
16  
17 459 Minorities: Based on the Analysis of 2011 Chinese Social Survey Data.  
18  
19 460 Ethno-National Studies 2016(02):42-54+124.  
20  
21  
22 461 9. Framework guidelines for addressing workplace violence in the health sector.  
23  
24 462 Geneva, Switzerland,: ISBN, 2002.  
25  
26  
27 463 10. Liu Y, Deng L, Min Y. Investigation of psychological violence at hospital  
28  
29 464 workplace in Guangzhou. Chinese Journal of Public Health  
30  
31 465 2009;25(09):1050-51.  
32  
33  
34 466 11. Qianqian W, Lei X. Investigation of workplace violence and influencing factors  
35  
36 467 of nurses in Pingyang County General Hospital. Journal of Traditional  
37  
38 468 Chinese Medicine Management 2016;24(17):18-20.  
39  
40  
41 469 12. Lulu S. The research of prevention of hospital workplace violence based on  
42  
43 470 game theory – through the analysis of hospital, patient, and media as game  
44  
45 471 role players. Jilin University, 2014.  
46  
47  
48  
49 472 13. Jiao M, Ning N, Li Y, et al. Workplace violence against nurses in Chinese  
50  
51 473 hospitals: a cross-sectional survey. Bmj Open 2015;5(3):e006719.  
52  
53  
54 474 14. Sun P, Zhang X, Sun Y, et al. Workplace Violence against Health Care Workers  
55  
56 475 in North Chinese Hospitals: A Cross-Sectional Survey. International Journal  
57  
58  
59  
60

- 1  
2  
3  
4 476 of Environmental Research and Public Health 2017;14(1):96.  
5  
6  
7 477 15. Baukje M, Ryan H, Anita LL, et al. Prevalence of abusive encounters in the  
8  
9 478 workplace of family physicians: a minor, major, or severe problem?  
10  
11 479 Canadian Family Physician Médecin De Famille Canadien 2010;56(3):e101.  
12  
13  
14 480 16. Campbell JC, Jill Theresa M, Joan K, et al. Workplace violence: prevalence and  
15  
16  
17 481 risk factors in the safe at work study. Journal of Occupational &  
18  
19 482 Environmental Medicine 2011;53(1):82.  
20  
21  
22 483 17. Lyn Q. Workplace bullying in junior doctors: questionnaire survey. British  
23  
24 484 Medical Journal 2002;324(7342):878-79.  
25  
26  
27 485 18. Jane B, Geoff P. At breaking point: A survey of the wellbeing and working lives  
28  
29 486 of nurses in 2005. London, England: Royal College of Nursing, 2006.  
30  
31  
32 487 19. Giga SI, Hoel H, Lewis D. A Review of Black and Minority Ethnic (BME)  
33  
34 488 Employee Experiences of Workplace Bullying. 2008  
35  
36  
37 489 20. Keshet Y, Popper-Giveon A. Race-based experiences of ethnic minority health  
38  
39 490 professionals: Arab physicians and nurses in Israeli public healthcare  
40  
41 491 organizations. Ethnicity & Health 2017;23(4):1-18.  
42  
43  
44 492 21. Dehghan-Chaloshtari S, Ghodousi A. Factors and Characteristics of Workplace  
45  
46 493 Violence Against Nurses: A Study in Iran. Journal of Interpersonal Violence  
47  
48 494 2017:088626051668317.  
49  
50  
51  
52  
53 495 22. Kang C. Cultural differences between Tibetans and ethnic Han Chinese in  
54  
55 496 ultimatum bargaining experiments. Journal of Political Economy  
56  
57 497 2009;25(1):78-84.  
58  
59  
60

- 1  
2  
3  
4 498 23. Perloff RM, Bonder B, Ray GB, et al. Doctor-patient communication, cultural  
5  
6 499 competence, and minority health: Theoretical and empirical perspectives.  
7  
8  
9 500 American Behavioral Scientist 2006;49(6):835-52.  
10  
11 501 24. Beech B, Leather P. Workplace violence in the health care sector: A review of  
12  
13  
14 502 staff training and integration of training evaluation models. Aggression and  
15  
16  
17 503 Violent Behavior 2006;11(1):27-43.  
18  
19 504 25. Hahn S, Zeller A, Needham I, et al. Patient and visitor violence in general  
20  
21  
22 505 hospitals: A systematic review of the literature. Aggression and Violent  
23  
24  
25 506 Behavior 2008;13(6):431-41.  
26  
27 507 26. Siying W, Wei Z, Huangyuan L, et al. Workplace violence and influencing factors  
28  
29  
30 508 among medical professionals in China. American Journal of Industrial  
31  
32  
33 509 Medicine 2012;55(11):1000-08.  
34  
35 510 27. Algwaiz WM, Alghanim SA. Violence exposure among health care professionals  
36  
37  
38 511 in Saudi public hospitals. A preliminary investigation. Saudi Medical  
39  
40  
41 512 Journal 2012;33(1):76.  
42  
43 513 28. Carluccio A, Knychala V, Marshall C. Violence against frontline NHS staff.  
44  
45  
46 514 London: NHS Security Management Service, 2010.  
47  
48 515 29. Flannery RB, Walker AP. Characteristics of four types of patient assaults: six  
49  
50  
51 516 year analysis of the Assaulted Staff Action Program (ASAP). Psychiatric  
52  
53  
54 517 Quarterly 2011;82(1):11-21.  
55  
56 518 30. Kitaneh M, Hamdan M. Workplace violence against physicians and nurses in  
57  
58  
59 519 Palestinian public hospitals: a cross-sectional study. BMC Health Services  
60

- 1  
2  
3  
4 520 Research 2012;12(1):1-9.  
5  
6  
7 521 31. Arimatsu M, Wada K, Yoshikawa T, et al. An epidemiological study of work-  
8  
9 522 related violence experienced by physicians who graduated from a medical  
10  
11 523 school in Japan. *Journal of Occupational Health* 2008;50(5):357-61.  
12  
13  
14 524 32. Hills D, Joyce C. A review of research on the prevalence, antecedents,  
15  
16  
17 525 consequences and prevention of workplace aggression in clinical medical  
18  
19 526 practice. *Aggression and Violent Behavior* 2013;18(5):554-69.  
20  
21  
22 527 33. Whittington R, Wykes T, . . An observational study of associations between  
23  
24 528 nurse behaviour and violence in psychiatric hospitals. *Journal of*  
25  
26  
27 529 *Psychiatric and Mental Health Nursing* 2010;1(2):85-92.  
28  
29  
30 530 34. Coker AL, Smith PH, Thompson MP, et al. Social support protects against the  
31  
32 531 negative effects of partner violence on mental health. *Journal of Women's*  
33  
34  
35 532 *Health & Gender-based Medicine* 2002;11(5):465-76.  
36  
37  
38 533 35. Arnetz JE, Arnetz BB. Implementation and evaluation of a practical  
39  
40 534 intervention programme for dealing with violence towards health care  
41  
42  
43 535 workers. *Journal of Advanced Nursing* 2000;31(3):668-80.  
44  
45  
46 536 36. Ramezaninia J, Naghibi Sistani M, Ahangari Z, et al. Comparison of the effect of  
47  
48 537 toothbrushing education via video, lecture and pamphlet on the dental  
49  
50  
51 538 plaque index of 12-year-old children. *Children* 2018;5(4):50.  
52  
53  
54 539 37. Li F, Jiang F, Jin X-M, et al. Cost-efficiency assessment of 3 different pediatric  
55  
56 540 first-aid training models for caregivers and teachers in Shanghai. *Pediatric*  
57  
58 541 *emergency care* 2011;27(5):357-60.  
59  
60

- 1  
2  
3  
4 542 38. Lees A, Rock W. A Comparison between Written, Verbal, and Videotape Rral  
5  
6 543 Hygiene Instruction for Patients with Fixed Appliances. British Journal of  
7  
8  
9 544 Orthodontics 2000;27(4):323-28.
- 10  
11 545 39. Meloy JR. Pathologies of attachment, violence, and criminality. Handbook of  
12  
13  
14 546 Psychology 2003:509-26.
- 15  
16  
17 547 40. Meloy JR. The psychopathic mind: Origins, dynamics, and treatment: Rowman  
18  
19 548 & Littlefield 1988.
- 20  
21  
22 549 41. Heckemann B, , Zeller A, , Hahn S, , et al. The effect of aggression management  
23  
24 550 training programmes for nursing staff and students working in an acute  
25  
26 551 hospital setting. A narrative review of current literature. Nurse Education  
27  
28 552 Today 2015;35(1):212-19.
- 29  
30  
31  
32 553 42. Moore PV, Simonowitz JA, Rigdon JE, et al. Workplace violence: prevention  
33  
34 554 efforts by the occupational health nurse. AAOHN Journal 1997;45(6):305-  
35  
36 555 18.
- 37  
38  
39  
40 556 43. Guidelines for preventing workplace violence for health care social service  
41  
42 557 workers. Guidelines for preventing workplace violence for health care  
43  
44 558 social service workers: Occupational Safety Health Administration 2004.
- 45  
46  
47  
48 559 44. Healthcare workers wear helmets to work for safety: Sina; 2006 [Available  
49  
50 560 from: [http://news.sina.com.cn/s/p/2006-12-](http://news.sina.com.cn/s/p/2006-12-25/064711876752.shtml)  
51  
52  
53 561 [25/064711876752.shtml](http://news.sina.com.cn/s/p/2006-12-25/064711876752.shtml)2006.
- 54  
55  
56 562

**STROBE 2007 (v4) Statement—Checklist of items that should be included in reports of *cross-sectional studies***

| Section/Topic                | Item # | Recommendation                                                                                                                                                                       | Reported on page # |
|------------------------------|--------|--------------------------------------------------------------------------------------------------------------------------------------------------------------------------------------|--------------------|
| <b>Title and abstract</b>    | 1      | (a) Indicate the study's design with a commonly used term in the title or the abstract                                                                                               | 2                  |
|                              |        | (b) Provide in the abstract an informative and balanced summary of what was done and what was found                                                                                  | 2-3                |
| <b>Introduction</b>          |        |                                                                                                                                                                                      |                    |
| Background/rationale         | 2      | Explain the scientific background and rationale for the investigation being reported                                                                                                 | 3-6                |
| Objectives                   | 3      | State specific objectives, including any prespecified hypotheses                                                                                                                     | 6                  |
| <b>Methods</b>               |        |                                                                                                                                                                                      |                    |
| Study design                 | 4      | Present key elements of study design early in the paper                                                                                                                              | 6                  |
| Setting                      | 5      | Describe the setting, locations, and relevant dates, including periods of recruitment, exposure, follow-up, and data collection                                                      | 6-8                |
| Participants                 | 6      | (a) Give the eligibility criteria, and the sources and methods of selection of participants                                                                                          | 8                  |
| Variables                    | 7      | Clearly define all outcomes, exposures, predictors, potential confounders, and effect modifiers. Give diagnostic criteria, if applicable                                             | 7-8                |
| Data sources/<br>measurement | 8*     | For each variable of interest, give sources of data and details of methods of assessment (measurement). Describe comparability of assessment methods if there is more than one group | 7-9                |
| Bias                         | 9      | Describe any efforts to address potential sources of bias                                                                                                                            | -                  |
| Study size                   | 10     | Explain how the study size was arrived at                                                                                                                                            | 8                  |
| Quantitative variables       | 11     | Explain how quantitative variables were handled in the analyses. If applicable, describe which groupings were chosen and why                                                         | 8-9                |
| Statistical methods          | 12     | (a) Describe all statistical methods, including those used to control for confounding                                                                                                | 8-9                |
|                              |        | (b) Describe any methods used to examine subgroups and interactions                                                                                                                  | -                  |
|                              |        | (c) Explain how missing data were addressed                                                                                                                                          | -                  |
|                              |        | (d) If applicable, describe analytical methods taking account of sampling strategy                                                                                                   | -                  |
|                              |        | (e) Describe any sensitivity analyses                                                                                                                                                | -                  |
| <b>Results</b>               |        |                                                                                                                                                                                      |                    |

|                          |     |                                                                                                                                                                                                              |       |
|--------------------------|-----|--------------------------------------------------------------------------------------------------------------------------------------------------------------------------------------------------------------|-------|
| Participants             | 13* | (a) Report numbers of individuals at each stage of study—eg numbers potentially eligible, examined for eligibility, confirmed eligible, included in the study, completing follow-up, and analysed            | 8     |
|                          |     | (b) Give reasons for non-participation at each stage                                                                                                                                                         | 8     |
|                          |     | (c) Consider use of a flow diagram                                                                                                                                                                           | -     |
| Descriptive data         | 14* | (a) Give characteristics of study participants (eg demographic, clinical, social) and information on exposures and potential confounders                                                                     | 10    |
|                          |     | (b) Indicate number of participants with missing data for each variable of interest                                                                                                                          | -     |
| Outcome data             | 15* | Report numbers of outcome events or summary measures                                                                                                                                                         | 10-20 |
| Main results             | 16  | (a) Give unadjusted estimates and, if applicable, confounder-adjusted estimates and their precision (eg, 95% confidence interval). Make clear which confounders were adjusted for and why they were included | 10-20 |
|                          |     | (b) Report category boundaries when continuous variables were categorized                                                                                                                                    | 10-16 |
|                          |     | (c) If relevant, consider translating estimates of relative risk into absolute risk for a meaningful time period                                                                                             | -     |
| Other analyses           | 17  | Report other analyses done—eg analyses of subgroups and interactions, and sensitivity analyses                                                                                                               | -     |
| <b>Discussion</b>        |     |                                                                                                                                                                                                              |       |
| Key results              | 18  | Summarise key results with reference to study objectives                                                                                                                                                     | 21    |
| Limitations              | 19  | Discuss limitations of the study, taking into account sources of potential bias or imprecision. Discuss both direction and magnitude of any potential bias                                                   | 26-27 |
| Interpretation           | 20  | Give a cautious overall interpretation of results considering objectives, limitations, multiplicity of analyses, results from similar studies, and other relevant evidence                                   | 21-26 |
| Generalisability         | 21  | Discuss the generalisability (external validity) of the study results                                                                                                                                        | 27    |
| <b>Other information</b> |     |                                                                                                                                                                                                              |       |
| Funding                  | 22  | Give the source of funding and the role of the funders for the present study and, if applicable, for the original study on which the present article is based                                                | 28    |

\*Give information separately for cases and controls in case-control studies and, if applicable, for exposed and unexposed groups in cohort and cross-sectional studies.

**Note:** An Explanation and Elaboration article discusses each checklist item and gives methodological background and published examples of transparent reporting. The STROBE checklist is best used in conjunction with this article (freely available on the Web sites of PLoS Medicine at <http://www.plosmedicine.org/>, Annals of Internal Medicine at <http://www.annals.org/>, and Epidemiology at <http://www.epidem.com/>). Information on the STROBE Initiative is available at [www.strobe-statement.org](http://www.strobe-statement.org).

# BMJ Open

## Workplace violence against healthcare professionals in multi-ethnicity area: A cross-sectional study in southwest China

|                                 |                                                                                                                                                                                                                                                                                                                                                                                                                                                                                                                                                                                                                                                                                                                                                                                                                                                                                                                                                                                                                                                                                                                                                                                                                                                                                                                                                                                                                                         |
|---------------------------------|-----------------------------------------------------------------------------------------------------------------------------------------------------------------------------------------------------------------------------------------------------------------------------------------------------------------------------------------------------------------------------------------------------------------------------------------------------------------------------------------------------------------------------------------------------------------------------------------------------------------------------------------------------------------------------------------------------------------------------------------------------------------------------------------------------------------------------------------------------------------------------------------------------------------------------------------------------------------------------------------------------------------------------------------------------------------------------------------------------------------------------------------------------------------------------------------------------------------------------------------------------------------------------------------------------------------------------------------------------------------------------------------------------------------------------------------|
| Journal:                        | <i>BMJ Open</i>                                                                                                                                                                                                                                                                                                                                                                                                                                                                                                                                                                                                                                                                                                                                                                                                                                                                                                                                                                                                                                                                                                                                                                                                                                                                                                                                                                                                                         |
| Manuscript ID                   | bmjopen-2020-037464.R1                                                                                                                                                                                                                                                                                                                                                                                                                                                                                                                                                                                                                                                                                                                                                                                                                                                                                                                                                                                                                                                                                                                                                                                                                                                                                                                                                                                                                  |
| Article Type:                   | Original research                                                                                                                                                                                                                                                                                                                                                                                                                                                                                                                                                                                                                                                                                                                                                                                                                                                                                                                                                                                                                                                                                                                                                                                                                                                                                                                                                                                                                       |
| Date Submitted by the Author:   | 05-Jun-2020                                                                                                                                                                                                                                                                                                                                                                                                                                                                                                                                                                                                                                                                                                                                                                                                                                                                                                                                                                                                                                                                                                                                                                                                                                                                                                                                                                                                                             |
| Complete List of Authors:       | Jia, Haonan; Harbin Medical University, Department of Health Policy and Hospital Management<br>Fang, Huiying; Qingdao Women and Children's Hospital, President's Office<br>Chen, Ruohui; Harbin Medical University, Department of Health Policy and Hospital Management<br>Jiao, Mingli; Harbin Medical University, Department of Health Policy and Hospital Management; Chinese Academy of Social Sciences<br>Wei, Lifeng; Harbin Medical University, Department of Health Policy and Hospital Management<br>Zhang, Gangyu; Harbin Medical University, Department of Health, Policy and Hospital Management<br>Li, Yuanheng; Harbin Medical University, Department of Health Policy and Hospital Management<br>Wang, Ying; Harbin Medical University, Department of Health Policy and Hospital Management<br>Wang, Yameng; Harbin Medical University, Department of Health Policy and Hospital Management<br>Jiang, Kexin; General Hospital of Heilongjiang Agricultural Reclamation, Medical department<br>Li, Jingqun; No.1 People's Hospital of Heihe, Department of Cardiology<br>Jia, Xiaowen; No.1 People's Hospital of Heihe, Department of General Surgery<br>Ismael, Omar Yacouba; Harbin Medical University, Department of Health Policy and Hospital Management<br>Mao, Jingfu; Harbin Medical University, Department of Human Resource Management<br>Wu, Qunhong; Harbin Medical University, Department of Social Medicine |
| <b>Primary Subject Heading</b>: | Public health                                                                                                                                                                                                                                                                                                                                                                                                                                                                                                                                                                                                                                                                                                                                                                                                                                                                                                                                                                                                                                                                                                                                                                                                                                                                                                                                                                                                                           |
| Secondary Subject Heading:      | Medical management, Occupational and environmental medicine                                                                                                                                                                                                                                                                                                                                                                                                                                                                                                                                                                                                                                                                                                                                                                                                                                                                                                                                                                                                                                                                                                                                                                                                                                                                                                                                                                             |
| Keywords:                       | Health & safety < HEALTH SERVICES ADMINISTRATION & MANAGEMENT, PUBLIC HEALTH, Health policy < HEALTH SERVICES ADMINISTRATION & MANAGEMENT                                                                                                                                                                                                                                                                                                                                                                                                                                                                                                                                                                                                                                                                                                                                                                                                                                                                                                                                                                                                                                                                                                                                                                                                                                                                                               |
|                                 |                                                                                                                                                                                                                                                                                                                                                                                                                                                                                                                                                                                                                                                                                                                                                                                                                                                                                                                                                                                                                                                                                                                                                                                                                                                                                                                                                                                                                                         |



1  
2  
3  
4  
5  
6  
7  
8  
9  
10  
11  
12  
13  
14  
15  
16  
17  
18  
19  
20  
21  
22  
23  
24  
25  
26  
27  
28  
29  
30  
31  
32  
33  
34  
35  
36  
37  
38  
39  
40  
41  
42  
43  
44  
45  
46  
47  
48  
49  
50  
51  
52  
53  
54  
55  
56  
57  
58  
59  
60

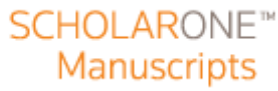

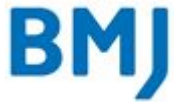

I, the Submitting Author has the right to grant and does grant on behalf of all authors of the Work (as defined in the below author licence), an exclusive licence and/or a non-exclusive licence for contributions from authors who are: i) UK Crown employees; ii) where BMJ has agreed a CC-BY licence shall apply, and/or iii) in accordance with the terms applicable for US Federal Government officers or employees acting as part of their official duties; on a worldwide, perpetual, irrevocable, royalty-free basis to BMJ Publishing Group Ltd ("BMJ") its licensees and where the relevant Journal is co-owned by BMJ to the co-owners of the Journal, to publish the Work in this journal and any other BMJ products and to exploit all rights, as set out in our [licence](#).

The Submitting Author accepts and understands that any supply made under these terms is made by BMJ to the Submitting Author unless you are acting as an employee on behalf of your employer or a postgraduate student of an affiliated institution which is paying any applicable article publishing charge ("APC") for Open Access articles. Where the Submitting Author wishes to make the Work available on an Open Access basis (and intends to pay the relevant APC), the terms of reuse of such Open Access shall be governed by a Creative Commons licence – details of these licences and which [Creative Commons](#) licence will apply to this Work are set out in our licence referred to above.

Other than as permitted in any relevant BMJ Author's Self Archiving Policies, I confirm this Work has not been accepted for publication elsewhere, is not being considered for publication elsewhere and does not duplicate material already published. I confirm all authors consent to publication of this Work and authorise the granting of this licence.

1 **Workplace violence against healthcare professionals in multi-**  
2 **ethnicity area: A cross-sectional study in southwest China**

3 Haonan Jia<sup>a\*</sup>, Huiying Fang<sup>b\*</sup>, Ruohui Chen<sup>a\*</sup>, Mingli Jiao<sup>a,c</sup>✉, Lifeng Wei<sup>a</sup>, Gangyu  
4 Zhang<sup>a</sup>, Yuanheng Li<sup>a</sup>, Ying Wang<sup>a</sup>, Yameng Wang<sup>a</sup>, Kexin Jiang<sup>d</sup>, Jingqun Li<sup>e</sup>,  
5 Xiaowen Jia<sup>f</sup>, Omar Yacouba Ismael<sup>a</sup>, Jingfu Mao<sup>g</sup>✉, Qunhong Wu<sup>h</sup>

6 *a Department of Health Policy and Hospital Management, Harbin Medical University,*  
7 *Nangang District, Harbin, China;*

8 *b President's Office, Qingdao Women and Children's Hospital, Shibei District,*  
9 *Qingdao, China;*

10 *c Chinese Academy of Social Science, Institute of Quantitative & Technical Economics,*  
11 *Dongcheng District, Beijing China;*

12 *d Medical department, General Hospital of Heilongjiang Agricultural Reclamation,*  
13 *Harbin 150088, China*

14 *e Department of Cardiology, No.1 People's Hospital of Heihe, Aihui District, Heihe,*  
15 *China;*

16 *f Department of General Surgery, No.1 People's Hospital of Heihe, Aihui District,*  
17 *Heihe, China;*

18 *g Department of Human Resource Management, Harbin Medical University, Nangang*  
19 *District, Harbin, China;*

20 *h Department of Social Medicine, Harbin Medical University, Nangang District,*  
21 *Harbin, China*

22 **\*Contributed Equally**

1  
2  
3  
4 **23 Corresponding author:**  
5

6  
7 24 Mingli Jiao, Harbin Medical University, 157 Baojian Road, Nangang District, Harbin,  
8  
9 25 Heilongjiang, 150086, China. Email: minglijiao@126.com. Tel:+86 13613675693  
10

11  
12 26 Jingfu Mao, Harbin Medical University, 157 Baojian Road, Nangang District, Harbin,  
13  
14 27 Heilongjiang, 150086, China. Email: mjfhyd@yeah.com. Tel:+86 13836134966  
15  
16

17 **28 Word count:** 3915  
18

19 **29 Abstract**  
20

21  
22 30 **Objective:** The purpose of this study is to examine workplace violence (WPV)  
23  
24 31 towards healthcare professionals in multi-ethnicity area of China, including  
25  
26 32 prevalence, influencing factors, healthcare professionals' response to WPV,  
27  
28 33 expected anti-violence training measures and content, and evaluation of WPV  
29  
30 34 interventions.  
31  
32

33  
34 35 **Design:** A cross-sectional study.  
35  
36

37  
38 36 **Setting:** A Grade III Class A hospital in the capital of Yunnan province, which is the  
39  
40 37 province with most kinds of ethnic minorities groups in China.  
41  
42

43  
44 38 **Participants:** In total, 2,036 healthcare professionals participated with a response  
45  
46 39 rate was 83.79%.  
47

48  
49 40 **Results:** The prevalence of physical and psychological violence was 5.4% and  
50  
51 41 43.7%, respectively. Healthcare professionals who were ethnic minorities were  
52  
53 42 more likely to experience psychological violence (OR=1.54, 95%CI=1.16-2.05).  
54

55  
56 43 After stratified by gender, males who were ethnic minorities suffered more  
57  
58 44 physical violence (OR=3.31, 95%CI=1.12-9.79), while females suffered  
59  
60

1  
2  
3  
4 45 psychological violence (OR=1.71, 95%CI=1.24-2.36). We also found a unique  
5  
6 46 work situation in China—overtime duty on call work (6 pm-7 am) was a risk factor  
7  
8  
9 47 of psychological violence (OR=1.403, 95%CI=1.02-.93). Ethnic minority  
10  
11 48 healthcare professionals less likely ordered perpetrators to stop or reported to  
12  
13  
14 49 superiors when facing psychological violence. Ethnic minority healthcare  
15  
16  
17 50 professionals are more interested in receiving training of force skills and self-  
18  
19  
20 51 defense. Both Han and ethnic minority participants considered security measures  
21  
22 52 as the most useful intervention, while changing the time of shift as the most  
23  
24  
25 53 useless one.

26  
27 54 Conclusion: Our study comprehensively described WPV towards healthcare  
28  
29  
30 55 professionals in multi-ethnicity minority area. More WPV research conducted in  
31  
32 56 multi-ethnicity area are needed.

33  
34  
35 57 **Keyword:** Workplace violence; healthcare professionals; multi-ethnicity area

36  
37  
38 58 **Strengths and limitations**

- 39  
40 59 ✧ Although lots of studies investigated WPV in hospital, few of them were  
41  
42 60 conducted in multi-ethnicity minority area.
- 43  
44 61 ✧ Previous studies paid attention to a single part of WPV whereas our study  
45  
46 62 describes WPV comprehensively including prevalence, influencing factor,  
47  
48 63 response to WPV.
- 49  
50 64 ✧ Due to recall bias or reporting bias resulting from shame and stigma, the  
51  
52 65 number of violent events in the past 12 months may be underestimated.
- 53  
54 66 ✧ Our study did not explain WPV using cultural factors, which further studies  
55  
56  
57  
58  
59  
60

1  
2  
3  
4 67 can investigate.  
5

6  
7 68 **1. Introduction**  
8

9 69 In December 2019, a doctor was brutally killed by a patient's family member in  
10  
11 70 Beijing. Less than a month later, another doctor in Beijing hospital was stabbed  
12  
13  
14 71 and severely injured. These two cases once again drew great attention to the safety  
15  
16  
17 72 of healthcare professionals in the Chinese society.  
18

19 73 Workplace violence (WPV) was defined as "incidents where employees are  
20  
21  
22 74 abused, threatened, assaulted or subject to other offensive acts or behaviors in  
23  
24  
25 75 circumstances related to their work", which includes two types: (1) physical  
26  
27 76 violence (e.g., beating, kicking, slapping, stabbing, shooting, pushing, biting, and  
28  
29  
30 77 pinching) and (2) psychological violence (e.g., threat of physical force against  
31  
32  
33 78 another person or group that can result in harm to physical, mental, spiritual,  
34  
35 79 moral, or social development)<sup>1</sup>. WPV towards healthcare professionals is an  
36  
37  
38 80 extremely serious problem in China, which is happening for a long time. There  
39  
40  
41 81 were less than 290 severe WPV towards healthcare workers reported by media  
42  
43  
44 82 from 2000 to 2015<sup>2</sup>. The seriousness of WPV towards healthcare professionals in  
45  
46  
47 83 China leads to great attention from researchers. Most of researches that studied  
48  
49  
50 84 WPV prevalence of China were conducted in the area where the Han people (the  
51  
52  
53 85 main ethnic group in China) mainly live and rates of physical and psychological  
54  
55 86 violence were 6.4%–35.4% and 54.4%–79.8%, respectively <sup>3-8</sup>. However, there  
56  
57 87 were few WPV studies conducted in multi-ethnicity area of China. According to the  
58  
59 88 latest national census in 2010, ethnic minorities account for 8.49% of the total  
60

1  
2  
3  
4 89 population in China. In multi-ethnicity area, the proportion and ethnic diversity of  
5  
6 90 both ethnic minority patients and healthcare professionals is higher. In addition,  
7  
8  
9 91 there is preferential treatment policy in education for Chinese ethnic minorities  
10  
11 92 (lower threshold to receive high level of education), which may make ethnic  
12  
13  
14 93 minority workers' capabilities undervalued <sup>9 10</sup>. However, since healthcare  
15  
16  
17 94 professionals require high level of skill and education, it is still unknown whether  
18  
19  
20 95 the ethnic minority healthcare professionals' ability and skill would be  
21  
22 96 undervalued that can lead to patients' distrust with even more WPV occurrence. It  
23  
24  
25 97 is essential to provide more information of WPV in the multi-ethnicity area thus  
26  
27 98 conducting specific interventions. In addition, limited studies from other counties  
28  
29  
30 99 and regions focus on WPV towards healthcare professionals in multi-ethnicity  
31  
32  
33 100 areas.

34  
35 101 Although many studies have investigated the influence factor of WPV towards  
36  
37 102 healthcare professionals, an essential factor has been neglected. In China, more  
38  
39  
40 103 than 90% healthcare professionals work more than eight hours a day, which  
41  
42  
43 104 makes overtime work a common phenomenon <sup>11</sup>. Since the medical system  
44  
45  
46 105 requires healthcare professionals in charge to be responsible for their patients at  
47  
48  
49 106 any time, duty on call has become a form of overtime work. Healthcare workers  
50  
51 107 need to be on 24 hours standby and be able to return to hospital if patients are in  
52  
53  
54 108 an acute or severe situation, even when they have already got off work or having  
55  
56 109 a rest <sup>12</sup>. Previous studies found that workload was associated with WPV  
57  
58  
59 110 victimization <sup>13 14</sup>. However, limited WPV studies focused on relationship between  
60

1  
2  
3  
4 111 WPV experience and the exact form of overtime.  
5

6 112 Most previous WPV studies have only investigated a part of WPV, such as  
7  
8  
9 113 prevalence, influencing factors, or interventions. In this study, we aim to  
10  
11 114 investigate WPV in a general hospital of multi-ethnicity area, including the  
12  
13  
14 115 prevalence, influencing factors, response to WPV and evaluation of WPV  
15  
16  
17 116 intervention, which could not only interpret WPV from a broader perspective, but  
18  
19  
20 117 also provide more reference for practice.  
21

## 22 118 **2. Methods**

### 23 24 25 119 *2.1 Study population*

26  
27 120 Yunnan, located in southwestern border of China, has the greatest diversity of  
28  
29  
30 121 ethnic minorities in China, containing 52 of 56 ethnic groups (51 ethnic minority  
31  
32 122 groups and Han). In 2017, 33.6% residents in Yunnan were ethnic minority groups.  
33

34  
35 123 We conducted a retrospective survey in a Grade III Class A hospital in Kunming,  
36  
37  
38 124 the capital of Yunnan Province. The hospital was founded in 1939 and is the first  
39  
40 125 Grade III Class A hospital in Yunnan Province. It is one of the most capable general  
41  
42  
43 126 hospitals in Yunnan, containing 2,400 open beds and over 2 million annual total  
44  
45  
46 127 visits. Around 18.6% of the hospital's employees were ethnic minorities at the  
47  
48 128 time of the study. As a medical center in the province, it has a wide radiation range,  
49  
50  
51 129 and patients from all over the province come to the hospital seeking medical  
52  
53 130 treatment.  
54

### 55 56 131 *2.2 Questionnaire*

57  
58 132 A questionnaire developed jointly by the International Labor Office (ILO),  
59  
60



1  
2  
3  
4 133 International Council of Nurses (ICN), World Health Organization (WHO), and  
5  
6 134 Public Services International (PSI) in 2003 was used to measure WPV <sup>1</sup>. First, we  
7  
8  
9 135 asked for permission to use the questionnaire from the ILO and WHO. Thereafter,  
10  
11  
12 136 we translated it into Mandarin Chinese and back translated it into English to verify  
13  
14 137 the accuracy of the Mandarin version. After this translation processed, 17 experts  
15  
16  
17 138 in the field of healthcare were invited to assess the effectiveness of the  
18  
19  
20 139 measurement tools, including the applicability of culture and the appropriateness  
21  
22  
23 140 of language. We selected 79 medical staff to form a group and conducted a two-  
24  
25 141 week test-retest reliability test (0.83).

26  
27 142 The questionnaire included the following sections: (1) demographics (e.g.,  
28  
29  
30 143 gender, age, education, ethnicity, occupation) and work status (e.g., shift work,  
31  
32  
33 144 overtime duty on call work, participation in anti-violence training, anxiety  
34  
35 145 regarding WPV); (2) experience of physical violence in the past 12 months (i.e.,  
36  
37  
38 146 intentional behavior that harms healthcare workers physically); (3) experience of  
39  
40  
41 147 psychological violence in the past 12 months (i.e., verbal abuse, threatening events,  
42  
43  
44 148 and sexual harassment); (4) healthcare professionals' response to physical  
45  
46  
47 149 violence and psychological violence; (5) the expected measures (e.g., leaflets,  
48  
49  
50 150 video, lecture) and content of anti-violence training (e.g., WPV cognition, self-  
51  
52  
53 151 defense; (6) the evaluation of usefulness of WPV interventions.

### 53 152 *2.3 Sample and data collection*

54  
55  
56 153 First, we obtained permission from the hospital management office and human  
57  
58  
59 154 resource department to collect employee's information in the hospital. Thereafter,  
60

1  
2  
3  
4 155 the person in charge of each unit issued a questionnaire to the staff and informed  
5  
6 156 them of the instructions and precautions. The study subjects included doctors,  
7  
8  
9 157 nurses, medical technicians who participated voluntarily and remained  
10  
11  
12 158 anonymous.

13  
14 159 The respondents were asked to provide their experience of WPV in the previous  
15  
16  
17 160 12 months, therefore, we excluded employees who met any of the following  
18  
19  
20 161 criteria: (1) less than 1 year of work experience in this hospital; (2) short-term  
21  
22 162 secondment or training (less than 12 months); (3) personnel who did not come to  
23  
24  
25 163 work during the study period due to traveling, training, vacation, and so on.

26  
27 164 The questionnaire had to be completed by employees themselves and could not  
28  
29  
30 165 be answered by any other person. The time of data collection ranged from July to  
31  
32  
33 166 October 2017. A total of 2,036 valid questionnaires were collected, and the  
34  
35 167 effective response rate was 83.79%.

#### 36 37 168 *2.4 Data analysis*

38  
39  
40 169 Descriptive statistics were used to summarize the demographic characteristics,  
41  
42  
43 170 prevalence of physical and psychological violence and the response to WPV  
44  
45  
46 171 between Han and ethnic minority participants. Chi-square test and Fisher's exact  
47  
48  
49 172 were used to compare the difference of response to WPV between Han and ethnic  
50  
51 173 minority healthcare workers.

52  
53 174 Since ethnic minority participants were almost 1/5 of Han participants in our  
54  
55  
56 175 data collection, the result may be biased if we used the original data to conduct  
57  
58  
59 176 logistic regression. To control confounders and to balance the number of Han and  
60

1  
2  
3  
4 177 ethnic minority samples, propensity score matching (PSM) was used. The PSM  
5  
6 178 model used the ethnicity as a dependent variable, and age, gender, marriage status,  
7  
8  
9 179 educational background, and years of work experience as explanatory variables.  
10  
11 180 We matched the group of ethnic minority healthcare professionals (treatment  
12  
13  
14 181 group) to the group of Han healthcare professionals (control group) in a 1:2  
15  
16  
17 182 manner to create two groups. These two groups had similar explanatory variables  
18  
19 183 (age, gender, marriage status, educational background, years of work experience)  
20  
21  
22 184 and different dependent variable – ethnicity, which could control confounders and  
23  
24  
25 185 highlighted the comparison between Han and ethnic minority healthcare  
26  
27 186 professionals. After matching, a set of 960 cases were created, with 325 ethnic  
28  
29  
30 187 minority and 635 Han healthcare professionals. The matched set was used to  
31  
32  
33 188 identify the factors associated with WPV in hospitals using logistics regression.  
34  
35 189 Since the proportion of male and female was almost 1:3, we also conducted  
36  
37  
38 190 logistics regression stratified by gender.

39  
40 191 The data were entered using Epidata 3.1 and analyzed using IBM SPSS Statistics  
41  
42  
43 192 22.0. The significance level was set at 0.05.

### 44 45 193 *2.5 Ethics approval*

46  
47  
48 194 This study was reviewed and approved by the Research Ethics Committee of  
49  
50  
51 195 Harbin Medical University and the investigation hospital (Project Identification  
52  
53 196 Code: HMUIRB20160014). All the respondents were provided with informed  
54  
55  
56 197 consent, which described the purpose and method of data collection and kept the  
57  
58  
59 198 data confidential.  
60

199 *2.6 Patient and public involvement*

200 No patients were involved in the whole process of the research.

201 **3. Results**

202 *3.1 Demographic characteristics*

203 Table 1 shows the demographic details of the 509 men and 1,527 women who  
 204 participated in the study. Around 84% of respondents were of “Han ethnicity”,  
 205 while 16% were ethnic minorities. A majority of respondents were nurses (42.7%)  
 206 and physicians (31.5%), 12.5% were medical technology workers, the rest (11.6%)  
 207 held other positions. Most of the respondents (70.2%) worked in rotational shifts,  
 208 and 74.2% engaged in overtime work (from 6 pm to 7 am the next day), such as  
 209 overtime or emergency consultation. Over half reported high or extremely high  
 210 levels of anxiety regarding WPV (58.9%) and participated in anti-violence training  
 211 (67.5%). As for the prevalence of WPV, 43.7% of the respondents reported that  
 212 they had experienced psychological violence, while 5.4% reported physical  
 213 violence.

215 **Table 1. Demographic information and the prevalence of workplace violence**

216 (N=2036)

|               | n    | %     |
|---------------|------|-------|
| <b>Gender</b> |      |       |
| Male          | 509  | 25.0% |
| Female        | 1527 | 75.0% |

---

|                                 |      |       |
|---------------------------------|------|-------|
| <b>Age</b>                      |      |       |
| ≤30                             | 940  | 46.2% |
| 31–45                           | 789  | 38.8% |
| ≥46                             | 207  | 15.1% |
| <b>Marital status</b>           |      |       |
| Single                          | 603  | 29.6% |
| Married                         | 1389 | 68.2% |
| Divorced/widowed                | 44   | 2.2%  |
| <b>Education background</b>     |      |       |
| College graduates               | 448  | 22.0% |
| Bachelor                        | 1207 | 59.3% |
| Master's and above              | 381  | 18.7% |
| <b>Ethnicity</b>                |      |       |
| Han                             | 1711 | 84.0% |
| Minority                        | 325  | 16.0% |
| <b>Years of work experience</b> |      |       |
| 1–5                             | 570  | 28.0% |
| 6–10                            | 548  | 26.9% |
| 11–20                           | 413  | 20.3% |
| >20                             | 505  | 24.8% |
| <b>Profession</b>               |      |       |

---

---

|                               |      |       |
|-------------------------------|------|-------|
| Physician                     | 624  | 31.5% |
| Nurse                         | 869  | 42.7% |
| Medical technology            | 255  | 12.5% |
| Others                        | 236  | 11.6% |
| <b>Work in shift</b>          |      |       |
| Yes                           | 1429 | 70.2  |
| No                            | 607  | 29.8  |
| <b>Overtime duty on call</b>  |      |       |
| <b>work (6 pm-7 am)</b>       |      |       |
| Yes                           | 1510 | 74.2% |
| No                            | 526  | 25.8% |
| <b>Anxiety level</b>          |      |       |
| Never                         | 103  | 5.1%  |
| Low                           | 219  | 10.8% |
| Moderate                      | 513  | 25.2% |
| High                          | 360  | 17.7% |
| Extremely high                | 841  | 41.2% |
| <b>Anti-violence training</b> |      |       |
| Yes                           | 1374 | 67.5% |
| No                            | 662  | 32.5% |
| <b>Physical violence</b>      |      |       |
| Yes                           | 110  | 5.4%  |

---

|                               |      |       |
|-------------------------------|------|-------|
| No                            | 1926 | 94.5% |
| <b>Psychological violence</b> |      |       |
| Yes                           | 889  | 43.7% |
| No                            | 1147 | 56.3% |

### 217 *3.2 Influencing factors*

218 Table 2 shows the results of the logistic regression analysis of physical and  
 219 psychological violence using the matched set (unstratified and stratified by  
 220 gender), including P-values, odds ratios (OR) and 95% confidence intervals  
 221 (95%CI). The unstratified results showed that female respondents had lower odds  
 222 of experiencing physical violence than males did (OR=0.29, 95%CI=0.15-0.55).  
 223 Respondents with anxiety level towards WPV had higher odds of physical violence  
 224 (OR=1.88, 95%CI=1.34-2.62). After stratified by gender, the results showed that  
 225 the educational background of masters and above (OR=7.49, 95%CI=1.27-44.04),  
 226 ethnic minority (OR=3.31, 95%CI=1.12-9.79), anxiety level towards WPV  
 227 (OR=2.46, 95%CI=1.35-4.48) were associated with physical violence occurrence  
 228 for males, while only anxiety level towards WPV (OR=1.84, 95%CI=1.17-2.88)  
 229 was statistically significant in physical violence experience for females.

230 As for psychological violence, minority medical workers had higher odds of  
 231 experiencing it than workers of Han ethnicity (OR=1.54, 95%CI=1.16-2.05).  
 232 Engaging in overtime work from 6 pm to 7 am the following day was also a risk  
 233 factor of psychological violence (OR=1.40, 95%CI=1.02-1.93). Anxiety level about  
 234 WPV was also negatively associated with psychological violence (OR=1.50,

1  
2  
3  
4 235 95%CI=1.33-1.70). When stratified by gender, females who were ethnic  
5  
6  
7 236 minorities (OR=1.71, 95%CI=1.24-2.36) were more likely to suffer psychological  
8  
9  
10 237 violence, while anti-violence training (OR=0.71, 95%CI=0.51-0.99) was  
11  
12 238 positively associated with psychological violence; both males (OR=1.48,  
13  
14 239 95%CI=1.14-1.92) and females (OR=1.51, 95%CI=1.31-1.74) with higher  
15  
16  
17 240 anxiety levels towards WPV were associated with WPV victimization.  
18  
19  
20  
21  
22  
23  
24  
25  
26  
27  
28  
29  
30  
31  
32  
33  
34  
35  
36  
37  
38  
39  
40  
41  
42  
43  
44  
45  
46  
47  
48  
49  
50  
51  
52  
53  
54  
55  
56  
57  
58  
59  
60



241

Table 2. Results of logistic regression of physical and psychological violence (N=960)

|                    | Physical violence   |                   |                 | Psychological violence |                 |                    |
|--------------------|---------------------|-------------------|-----------------|------------------------|-----------------|--------------------|
|                    | Unstratified        | Stratified        |                 | Unstratified           | Stratified      |                    |
|                    |                     | Male              | Female          |                        | Male            | Female             |
| <b>Gender</b>      |                     |                   |                 |                        |                 |                    |
| Male               | Reference           | -                 | -               | Reference              | -               | -                  |
| Female             | 0.29(0.15-0.55) *** | -                 | -               | 0.99(0.71-1.40)        | -               | -                  |
| <b>Ethnicity</b>   |                     |                   |                 |                        |                 |                    |
| Han                |                     | Reference         |                 |                        | Reference       |                    |
| Minority           | 1.57(0.86-2.87)     | 3.31(1.12-9.79) * | 1.18(0.53-2.63) | 1.54(1.16-2.05) **     | 1.07(0.56-2.03) | 1.71(1.24-2.36) ** |
| <b>Age (years)</b> |                     |                   |                 |                        |                 |                    |
| ≤30                |                     | Reference         |                 |                        | Reference       |                    |
| 31-45              | 1.26(0.27-6.01)     | 3.25(0.07-160.96) | 0.76(0.09-6.36) | 1.11(0.55-2.23)        | 0.77(0.19-3.14) | 1.46(0.64-3.33)    |

|    |                                 |                 |                   |                  |                 |                 |                 |
|----|---------------------------------|-----------------|-------------------|------------------|-----------------|-----------------|-----------------|
| 1  |                                 |                 |                   |                  |                 |                 |                 |
| 2  |                                 |                 |                   |                  |                 |                 |                 |
| 3  |                                 |                 |                   |                  |                 |                 |                 |
| 4  |                                 |                 |                   |                  |                 |                 |                 |
| 5  | ≥46                             | 1.44(0.43-4.80) | 0.52 (0.01-19.40) | 2.41(0.45-12.84) | 0.80(0.46-1.42) | 0.49(0.16-1.51) | 1.10(0.55-2.18) |
| 6  |                                 |                 |                   |                  |                 |                 |                 |
| 7  |                                 |                 |                   |                  |                 |                 |                 |
| 8  | <b>Marital status</b>           |                 |                   |                  |                 |                 |                 |
| 9  |                                 |                 |                   |                  |                 |                 |                 |
| 10 | Single                          |                 | Reference         |                  |                 | Reference       |                 |
| 11 |                                 |                 |                   |                  |                 |                 |                 |
| 12 |                                 |                 |                   |                  |                 |                 |                 |
| 13 | Married                         | 0.47(0.08-2.77) | 0.10(0.01-1.86)   | 0.97(0.09-10.92) | 0.85(0.30-2.44) | 0.57(0.05-6.35) | 0.85(0.26-2.78) |
| 14 |                                 |                 |                   |                  |                 |                 |                 |
| 15 |                                 |                 |                   |                  |                 |                 |                 |
| 16 | Divorced/widowed                | 0.46(0.09-2.41) | 0.32(0.02-4.84)   | 0.57(0.06-5.42)  | 0.95(0.34-2.62) | 0.78(0.08-7.99) | 0.88(0.28-2.75) |
| 17 |                                 |                 |                   |                  |                 |                 |                 |
| 18 | <b>Educational background</b>   |                 |                   |                  |                 |                 |                 |
| 19 |                                 |                 |                   |                  |                 |                 |                 |
| 20 |                                 |                 |                   |                  |                 |                 |                 |
| 21 | College graduates               |                 | Reference         |                  |                 | Reference       |                 |
| 22 |                                 |                 |                   |                  |                 |                 |                 |
| 23 |                                 |                 |                   |                  |                 |                 |                 |
| 24 | Bachelors                       | 0.98(0.35-2.75) | 0.92(0.10-8.70)   | 0.69(0.21-2.28)  | 0.92(0.58-1.47) | 1.18(0.50-2.83) | 0.88(0.50-1.55) |
| 25 |                                 |                 |                   |                  |                 |                 |                 |
| 26 | Masters and above               | 1.36(0.55-3.38) | 7.49(1.27-44.04)* | 0.45(0.15-1.38)  | 1.20(0.79-1.83) | 1.16(0.55-2.45) | 1.23(0.74-2.07) |
| 27 |                                 |                 |                   |                  |                 |                 |                 |
| 28 |                                 |                 |                   |                  |                 |                 |                 |
| 29 | <b>Years of work experience</b> |                 |                   |                  |                 |                 |                 |
| 30 |                                 |                 |                   |                  |                 |                 |                 |
| 31 | 1-5                             |                 | Reference         |                  |                 | Reference       |                 |
| 32 |                                 |                 |                   |                  |                 |                 |                 |
| 33 |                                 |                 |                   |                  |                 |                 |                 |
| 34 | 6-10                            | 0.82(0.20-3.31) | 1.00(0.02-51.35)  | 0.99(0.18-5.59)  | 0.54(0.28-1.02) | 0.60(0.16-2.24) | 0.51(0.24-1.08) |
| 35 |                                 |                 |                   |                  |                 |                 |                 |
| 36 |                                 |                 |                   |                  |                 |                 |                 |
| 37 | 11-20                           | 0.50(0.14-1.81) | 0.77(0.02-35.11)  | 0.51(0.10-2.53)  | 0.72(0.42-1.28) | 0.62(0.19-2.03) | 0.72(0.36-1.42) |
| 38 |                                 |                 |                   |                  |                 |                 |                 |
| 39 |                                 |                 |                   |                  |                 |                 |                 |
| 40 |                                 |                 |                   |                  |                 |                 |                 |
| 41 |                                 |                 |                   |                  |                 |                 |                 |
| 42 |                                 |                 |                   |                  |                 |                 |                 |
| 43 |                                 |                 |                   |                  |                 |                 |                 |
| 44 |                                 |                 |                   |                  |                 |                 |                 |
| 45 |                                 |                 |                   |                  |                 |                 |                 |
| 46 |                                 |                 |                   |                  |                 |                 |                 |

|    |                               |                     |                    |                    |                     |                     |                     |
|----|-------------------------------|---------------------|--------------------|--------------------|---------------------|---------------------|---------------------|
| 1  |                               |                     |                    |                    |                     |                     |                     |
| 2  |                               |                     |                    |                    |                     |                     |                     |
| 3  |                               |                     |                    |                    |                     |                     |                     |
| 4  |                               |                     |                    |                    |                     |                     |                     |
| 5  | >20                           | 0.80(0.27-2.36)     | 1.37(0.04-53.89)   | 0.85(0.25-2.84)    | 1.34(0.80-2.23)     | 1.44(0.46-4.50)     | 1.24(0.69-2.22)     |
| 6  |                               |                     |                    |                    |                     |                     |                     |
| 7  |                               |                     |                    |                    |                     |                     |                     |
| 8  | <b>Work in shift</b>          |                     |                    |                    |                     |                     |                     |
| 9  |                               |                     |                    |                    |                     |                     |                     |
| 10 | Yes                           | 1.16(0.58-2.35)     | 0.87(0.26-2.94)    | 1.51(0.59-3.86)    | 1.17(0.85-1.61)     | 1.28(0.65-2.52)     | 1.12(0.78-1.63)     |
| 11 |                               |                     |                    |                    |                     |                     |                     |
| 12 | No                            |                     | Reference          |                    |                     | Reference           |                     |
| 13 |                               |                     |                    |                    |                     |                     |                     |
| 14 |                               |                     |                    |                    |                     |                     |                     |
| 15 |                               |                     |                    |                    |                     |                     |                     |
| 16 | <b>Overtime duty on call</b>  |                     |                    |                    |                     |                     |                     |
| 17 |                               |                     |                    |                    |                     |                     |                     |
| 18 | <b>work (6 pm-7 am)</b>       |                     |                    |                    |                     |                     |                     |
| 19 |                               |                     |                    |                    |                     |                     |                     |
| 20 | Yes                           | 0.88(0.43-1.78)     | 1.34(0.31-5.86)    | 0.73(0.31-1.72)    | 1.40(1.02-1.93) *   | 1.26(0.57-2.78)     | 1.41(0.99-2.00)     |
| 21 |                               |                     |                    |                    |                     |                     |                     |
| 22 | No                            |                     | Reference          |                    |                     | Reference           |                     |
| 23 |                               |                     |                    |                    |                     |                     |                     |
| 24 |                               |                     |                    |                    |                     |                     |                     |
| 25 |                               |                     |                    |                    |                     |                     |                     |
| 26 | <b>Anxiety level</b>          | 1.88(1.34-2.62) *** | 2.46(1.35-4.48) ** | 1.84(1.17-2.88) ** | 1.50(1.33-1.70) *** | 1.48(1.14-1.92) *** | 1.51(1.31-1.74) *** |
| 27 |                               |                     |                    |                    |                     |                     |                     |
| 28 |                               |                     |                    |                    |                     |                     |                     |
| 29 | <b>Anti-violence training</b> |                     |                    |                    |                     |                     |                     |
| 30 |                               |                     |                    |                    |                     |                     |                     |
| 31 | Yes                           | 1.25(0.65-2.43)     | 3.29(0.87-12.47)   | 0.89(0.39-2.02)    | 0.80(0.59-1.06)     | 1.09(0.56-2.12)     | 0.71(0.51-0.99) *   |
| 32 |                               |                     |                    |                    |                     |                     |                     |
| 33 | No                            |                     | Reference          |                    |                     | Reference           |                     |
| 34 |                               |                     |                    |                    |                     |                     |                     |
| 35 |                               |                     |                    |                    |                     |                     |                     |

242 Note: (\*): p<0.05; (\*\*): p<0.01; (\*\*\*): p<0.001. All the variables in each logistic regression models were mutually adjusted.

1  
2  
3  
4 243 *3.3 Participants' response to WPV*  
5

6 244 Table 3 shows the different response to psychological/physical violence  
7  
8  
9 245 between Han and ethnic minority healthcare professionals. More Han healthcare  
10  
11 246 professionals ordered perpetrators to stop (OR=0.64, 95%CI=0.45-0.91) and  
12  
13  
14 247 reported to superiors (OR=0.56, 95%CI=0.40-0.79) than ethnic minorities when  
15  
16  
17 248 psychological violence happened, and this difference was statistically significant.  
18  
19 249 As for the physical violence, compared to ethnic minority, more Han healthcare  
20  
21  
22 250 professionals chose to respond in all ways except pretending nothing happened.  
23  
24  
25 251 However, none of the difference was statistically significant.  
26  
27  
28  
29  
30  
31  
32  
33  
34  
35  
36  
37  
38  
39  
40  
41  
42  
43  
44  
45  
46  
47  
48  
49  
50  
51  
52  
53  
54  
55  
56  
57  
58  
59  
60

Table 3. Response to psychological and physical violence

|                                    | Psychological violence |       |                         |       |                    | Physical Violence |       |                        |       |                  |
|------------------------------------|------------------------|-------|-------------------------|-------|--------------------|-------------------|-------|------------------------|-------|------------------|
|                                    | Han (N=727)            |       | Ethnic minority (N=162) |       | OR (95%CI)         | Han (N=88)        |       | Ethnic minority (N=22) |       | OR (95%CI)       |
|                                    | n                      | %     | n                       | %     |                    | n                 | %     | n                      | %     |                  |
| <b>Pretend nothing happened</b>    | 216                    | 29.71 | 49                      | 30.25 | 1.03(0.71-1.49)    | 6                 | 6.82  | 4                      | 18.18 | 3.04(0.78-11.88) |
| <b>Order to stop</b>               | 324                    | 44.57 | 55                      | 33.95 | 0.64(0.45-0.91)*** | 27                | 30.68 | 3                      | 13.64 | 0.36(0.10-1.31)  |
| <b>Talk to families or friends</b> | 474                    | 65.20 | 114                     | 70.37 | 1.27(0.88-1.84)    | 21                | 23.86 | 4                      | 18.18 | 0.71(0.22-2.33)  |
| <b>Psychological counseling</b>    | 70                     | 9.63  | 23                      | 14.20 | 1.55(0.94-2.57)    | 9                 | 10.23 | 2                      | 9.09  | 0.88(0.18-4.39)  |
| <b>Talk to colleague</b>           | 631                    | 86.80 | 131                     | 80.86 | 0.64(0.41-1.01)    | 33                | 37.50 | 6                      | 27.27 | 0.63(0.22-1.76)  |
| <b>Change department</b>           | 47                     | 6.46  | 13                      | 8.02  | 1.26(0.67-2.39)    | 4                 | 4.55  | 0                      | 0.00  | -                |
| <b>Report to superiors</b>         | 469                    | 64.51 | 82                      | 50.62 | 0.56(0.40-0.79)*** | 31                | 35.23 | 6                      | 27.27 | 0.69(0.24-1.94)  |
| <b>Charge perpetrators</b>         | 28                     | 3.85  | 4                       | 2.47  | 0.63(0.22-1.83)    | 5                 | 5.68  | 0                      | 0.00  | -                |

1  
2  
3  
4  
5  
6 253 Note: (\*):  $p < 0.05$ ; (\*\*):  $p < 0.01$ ; (\*\*\*):  $p < 0.001$ . Han participants as the reference.  
7  
8  
9  
10  
11  
12  
13  
14  
15  
16  
17  
18  
19  
20  
21  
22  
23  
24  
25  
26  
27  
28  
29  
30  
31  
32  
33  
34  
35  
36  
37  
38  
39  
40  
41  
42  
43  
44  
45  
46

For peer review only

254

255 *3.4 Anti-violence training measures and content*

256 Table 4 has shown the anti-violence training measures and content expected by  
 257 healthcare professionals. Lectures were the most expected measures of training  
 258 both by Han (54.13%) and ethnic minority (52.62%). Pre-job training was  
 259 expected from half of ethnic minority healthcare professionals, which was slightly  
 260 higher than the proportion of Han healthcare professionals (OR=1.29,  
 261 95%CI=1.01-1.63). Wall newspaper and poster were the least popular measures  
 262 both by Hans and ethnic minorities. As for the training content, more than 70%  
 263 Han and ethnic minority participants expected identification of WPV signs and  
 264 escaping training. Compared to Han, ethnic minority healthcare professionals  
 265 were more interested in force skills (OR=1.40, 95%CI=1.10-1.78) and self-  
 266 defense (OR=1.48, 95%CI=1.10-2.01).

267 **Table 4. Expected measures and contents of anti-violence training (N=2036)**

|                                   | Han |       | Ethnic minority |       | OR (95%CI)      |
|-----------------------------------|-----|-------|-----------------|-------|-----------------|
|                                   | n   | %     | n               | %     |                 |
| <b>Expected training measures</b> |     |       |                 |       |                 |
| Leaflets                          | 680 | 39.74 | 125             | 38.46 | 0.95(0.74-1.21) |
| Video                             | 759 | 44.36 | 145             | 44.62 | 1.01(0.80-1.28) |
| Lectures                          | 926 | 54.12 | 171             | 52.62 | 0.94(0.74-1.19) |
| Wall newspaper, poster            | 435 | 25.42 | 77              | 23.69 | 0.91(0.69-1.20) |
| Employee handbooks                | 507 | 29.63 | 93              | 28.62 | 0.95(0.73-1.24) |

|                                  |      |       |     |       |                    |
|----------------------------------|------|-------|-----|-------|--------------------|
| Pre-job training                 | 751  | 43.89 | 163 | 50.15 | 1.29(1.01-1.63) *  |
| <b>Expected training content</b> |      |       |     |       |                    |
| WPV cognition                    | 891  | 52.07 | 177 | 54.46 | 1.10(0.87-1.40)    |
| Identification of WPV signs      | 1242 | 72.59 | 234 | 72.00 | 0.97(0.75-1.27)    |
| Language skills                  | 1162 | 67.91 | 232 | 71.38 | 1.18(0.91-1.53)    |
| Force skills                     | 815  | 47.63 | 182 | 56.00 | 1.40(1.10-1.78) ** |
| Relevant laws and regulations    | 1113 | 65.05 | 223 | 68.62 | 1.18(0.91-1.52)    |
| Escaping training                | 1235 | 72.18 | 245 | 75.38 | 1.18(0.90-1.55)    |
| Self-defense                     | 1227 | 71.71 | 257 | 79.08 | 1.48(1.10-2.01) *  |

268 Note: (\*):  $p < 0.05$ ; (\*\*):  $p < 0.01$ ; (\*\*\*):  $p < 0.001$ . Han participants as the reference.

### 269 *3.5 Evaluation of the usefulness of WPV interventions*

270 As for the evaluation of interventions, there were no significant differences  
 271 between Han and ethnic minority healthcare professionals. Participants  
 272 considered that security measures were the most useful ways to prevent WPV. The  
 273 following were improving the environment and anti-violence training. More than  
 274 40% considered patient examination and changing the time of shift as useless  
 275 measures. There were few differences when stratified by ethnicity. More Han  
 276 healthcare workers looked down on the usefulness of protective equipment, while  
 277 ethnic minority participants undervalued patient examination and anti-violence  
 278 training. However, none of these differences between Han and ethnic minority  
 279 were statistically significant. (Table 5)



280

**Table 5. Evaluation of the usefulness of WPV interventions (N=2036)**

|                                                                   | All participants |       | Han |       | Ethnic minority |       |
|-------------------------------------------------------------------|------------------|-------|-----|-------|-----------------|-------|
|                                                                   | n                | %     | n   | %     | n               | %     |
| <b>Improve the environment (e.g., enhance lighting)</b>           |                  |       |     |       |                 |       |
| Very useful                                                       | 715              | 35.12 | 611 | 35.71 | 104             | 32.00 |
| Somewhat useful                                                   | 945              | 46.41 | 784 | 45.82 | 161             | 49.54 |
| Useless                                                           | 376              | 18.47 | 316 | 18.47 | 60              | 18.46 |
| <b>Restrict non-staff access</b>                                  |                  |       |     |       |                 |       |
| Very useful                                                       | 591              | 29.03 | 513 | 29.98 | 78              | 24.00 |
| Somewhat useful                                                   | 778              | 38.21 | 638 | 37.29 | 140             | 43.08 |
| Useless                                                           | 667              | 32.76 | 560 | 32.73 | 107             | 32.92 |
| <b>Patient examination (e.g., history of committing violence)</b> |                  |       |     |       |                 |       |
| Very useful                                                       | 498              | 24.46 | 429 | 25.07 | 69              | 21.23 |
| Somewhat useful                                                   | 698              | 34.28 | 586 | 34.25 | 112             | 34.46 |
| Useless                                                           | 840              | 41.26 | 696 | 40.68 | 144             | 44.31 |
| <b>Increase manpower</b>                                          |                  |       |     |       |                 |       |
| Very useful                                                       | 667              | 32.76 | 571 | 33.37 | 96              | 29.54 |
| Somewhat useful                                                   | 796              | 39.10 | 663 | 38.75 | 133             | 40.92 |
| Useless                                                           | 573              | 28.14 | 477 | 27.88 | 96              | 29.54 |
| <b>Protective equipment</b>                                       |                  |       |     |       |                 |       |
| Very useful                                                       | 610              | 29.96 | 522 | 30.51 | 88              | 27.08 |
| Somewhat useful                                                   | 738              | 36.25 | 625 | 36.53 | 113             | 34.77 |

|                                 |     |       |     |       |     |       |
|---------------------------------|-----|-------|-----|-------|-----|-------|
| Useless                         | 688 | 33.79 | 564 | 32.96 | 124 | 38.15 |
| <b>Change the time of shift</b> |     |       |     |       |     |       |
| Very useful                     | 470 | 23.08 | 411 | 24.02 | 59  | 18.15 |
| Somewhat useful                 | 699 | 34.33 | 578 | 33.78 | 121 | 37.23 |
| Useless                         | 867 | 42.58 | 722 | 42.20 | 145 | 44.62 |
| <b>Avoid working alone</b>      |     |       |     |       |     |       |
| Very useful                     | 659 | 32.37 | 568 | 33.20 | 91  | 28.00 |
| Somewhat useful                 | 636 | 31.24 | 526 | 30.74 | 110 | 33.85 |
| Useless                         | 741 | 36.39 | 617 | 36.06 | 124 | 38.15 |
| <b>Anti-violence training</b>   |     |       |     |       |     |       |
| Very useful                     | 785 | 38.56 | 675 | 39.45 | 110 | 33.85 |
| Somewhat useful                 | 800 | 39.29 | 672 | 39.28 | 128 | 39.38 |
| Useless                         | 449 | 22.05 | 362 | 21.16 | 87  | 26.77 |
| <b>Security measures</b>        |     |       |     |       |     |       |
| Very useful                     | 899 | 44.16 | 762 | 44.54 | 137 | 42.15 |
| Somewhat useful                 | 932 | 45.78 | 779 | 45.53 | 153 | 47.08 |
| Useless                         | 205 | 10.07 | 170 | 9.94  | 35  | 10.77 |

281

#### 282 4. Discussion

283 This study examined the prevalence, influence factors, and response of WPV in a  
 284 hospital located in the multi- ethnicity area of China. The percentage of medical  
 285 workers of minority ethnicity was substantially higher than previous studies

1  
2  
3  
4 286 conducted in eastern and central China (2.41–7.95%)<sup>15-17</sup>. Due to the different  
5  
6  
7 287 investigation tools and time period, it is difficult to compare the WPV prevalence  
8  
9  
10 288 with some other researches. However, compared with our previous studies with  
11  
12 289 the same questionnaire and time period, the prevalence of physical and  
13  
14 290 psychological violence in our study are lower than what has been found in areas  
15  
16  
17 291 where Han people mainly lived <sup>7 8 18 19</sup>. The results of logistics regression indicated  
18  
19  
20 292 that ethnic minority healthcare professionals maybe more likely to suffer  
21  
22 293 psychological violence. After stratified by gender, males who were ethnic  
23  
24 294 minorities were more likely to suffer physical violence, while females from  
25  
26  
27 295 psychological violence. The different results in stratified and unstratified analysis  
28  
29  
30 296 may be due to the proportion of males and females. Namely, in unstratified  
31  
32 297 analysis, the fact that males suffered more physical violence would be covered by  
33  
34  
35 298 the fact that females suffered more psychological violence. Some studies from  
36  
37  
38 299 other countries or regions showed that ethnic minority healthcare workers were  
39  
40  
41 300 less likely to experience WPV when comparing to the majority (Whites)<sup>20 21</sup>, while  
42  
43 301 some studies held the opposite conclusion that ethnic minority healthcare  
44  
45 302 professionals were more vulnerable in suffering workplace bullying, verbal abuse,  
46  
47  
48 303 physical violence, etc. <sup>22-26</sup> However, due to the huge difference between the  
49  
50  
51 304 background investigation and participants' characteristics, these studies could not  
52  
53  
54 305 be compared with our study. We speculate several reasons for this result. First,  
55  
56 306 our study showed that there were behavioral differences between Han and ethnic  
57  
58  
59 307 minority, culture and religious beliefs could be key factors in explaining this <sup>27</sup>.  
60

1  
2  
3  
4 308 Second, our study showed that when facing WPV, compared with Han, ethnic  
5  
6 309 minority healthcare professionals may be more likely to tolerate it, which may  
7  
8  
9 310 lead to more violence. Third, the language from difference linguistic culture may  
10  
11 311 hamper the doctor-patient communication, thus lead to violence<sup>28</sup>. Fourth, ethnic  
12  
13 312 minority healthcare professionals' ability or skill maybe undervalued by patients,  
14  
15 313 thus leading to distrust or WPV, which needs further studies to investigate this  
16  
17 314 phenomenon from the patients' perspective.

18  
19  
20  
21  
22 315 Respondents who engaged in overtime duty on call work from 6 pm to 7 am had  
23  
24 316 greater odds of experiencing psychological violence. This is a new finding in our  
25  
26 317 study, which has been ignored in most research of China. We speculate several  
27  
28 318 reasons for this finding. First, our definition of overtime duty on call work might  
29  
30 319 have captured individuals handling urgent issues. The staff working therein are  
31  
32 320 more likely to experience higher levels of frustration, distress, cognitive  
33  
34 321 impairment or arousal<sup>29 30</sup>, which is similar with the WPV high-risk department  
35  
36 322 — emergency department. Second, healthcare professionals would face more  
37  
38 323 aggressive situations such as drunk patients or companions and traumatic  
39  
40 324 patients caused by fighting. Third, since the on-call work is not during the general  
41  
42 325 working time, there are less colleagues and guards. We suggest that more effective  
43  
44 326 measures should be adopted to protect healthcare professionals who engage duty  
45  
46 327 on-call beyond general working time. Future studies should investigate this  
47  
48 328 phenomenon in mainly Han living area.

49 329 The result of logistics regression showed that males have higher odds of  
50  
51  
52  
53  
54  
55  
56  
57  
58  
59  
60

1  
2  
3  
4 330 experiencing physical violence, which is similar to the WPV studies conducted in  
5  
6 331 the areas that Han mainly lived <sup>7 19 31</sup>. In other countries, some studies came to the  
7  
8  
9 332 same conclusion <sup>32-35</sup>, while some studies have reported that women were more  
10  
11 333 vulnerable to physical violence <sup>36</sup>. These different results could be attributed to  
12  
13  
14 334 the different study backgrounds <sup>37</sup>. In many countries, beliefs, ethics, or moral  
15  
16  
17 335 principles serve as guidance for public behavior. For instance, in some Arab  
18  
19 336 countries, being a male is a risk factor of experiencing WPV partly because of  
20  
21  
22 337 cultural norms that reject disrespect of females <sup>35</sup>. Consistent with other  
23  
24  
25 338 researches <sup>7 19</sup> conducted in the areas that Han mainly lives in , our study showed  
26  
27 339 that higher anxiety levels regarding WPV was associated with WPV experience.  
28  
29  
30 340 Further study should determine whether the anxiety is the predisposition of  
31  
32  
33 341 consequence of WPV occurrence.

34  
35 342 Compared to Han, more ethnic minority healthcare professionals pretend  
36  
37 343 nothing happened after suffering physical violence. In addition, they may less  
38  
39  
40 344 likely talk to others about these events, or report to their leaders, or use legal  
41  
42  
43 345 methods. The reason we think there was no statistical significance in this result  
44  
45  
46 346 was that the number of participants who experienced physical violence was small.  
47  
48 347 Despite this, we speculate that this may be due to the cultural belief of ethnic  
49  
50  
51 348 minority that causes them to remain silent. Previous study has proved that talking  
52  
53  
54 349 with others in their surroundings about their WPV was helpful to release their  
55  
56 350 tension or anxiety caused from WPV <sup>38</sup>. Since the anxiety towards WPV is  
57  
58  
59 351 associated with WPV experience, more social support for the individual, such as  
60

1  
2  
3  
4 352 friends, families, and colleagues, should be provided to help ethnic minority  
5  
6 353 healthcare professionals manage violence through diverse methods instead of  
7  
8  
9 354 tolerating it by themselves. Previous study has shown that in the environment that  
10  
11 355 encourages reporting WPV, more incidents of WPV were reported and healthcare  
12  
13  
14 356 workers gained better awareness of risk for violence, as well as how to avoid  
15  
16  
17 357 potential danger, and how to manage aggressive customers <sup>39</sup>. An adequate WPV  
18  
19 358 reporting system should be established to encourage ethnic minority healthcare  
20  
21  
22 359 professionals to report their WPV experience.

23  
24 360 It seems that both Han and ethnic minority healthcare professionals are less  
25  
26  
27 361 interested in the textual anti-violence training measures (leaflets, poster, wall  
28  
29  
30 362 newspaper, employee handbook). Although printed materials could summarize  
31  
32  
33 363 content and be learned repeatedly, the lack of practice details makes it less  
34  
35 364 effective <sup>40</sup>. Videos hold the advantages such as attractiveness, convenience, clarity  
36  
37  
38 365 of demonstration, superior cost-effectiveness and easy to apply, while lectures  
39  
40  
41 366 contain variety of lively styles such as group interaction and scenario simulation,  
42  
43 367 which makes them more popular <sup>41 42</sup>. Future studies should compare the effect of  
44  
45  
46 368 these measures. Pre-job training is more needed by ethnic minority healthcare  
47  
48  
49 369 workers, which could help them adapt to the work environment better and faster.  
50  
51 370 As for the training content, ethnic minority healthcare professionals are more  
52  
53  
54 371 interested in tough measures. Since ethnic minorities are more likely to suffer  
55  
56  
57 372 psychological violence, they may perceive more threat thus give rise to the  
58  
59 373 tendency of handling violence by force <sup>43 44</sup>.

1  
2  
3  
4 374 Our findings indicated that there was not much difference in evaluation of  
5  
6 375 usefulness of WPV intervention between Han and ethnic minority. Security  
7  
8  
9 376 measure is regarded as the most useful intervention of WPV. China has enacted  
10  
11 377 'Guidance on strengthening the security and protection system construction in  
12  
13  
14 378 hospitals' in 2013, and 'Opinions on strictly punishing medical related crimes and  
15  
16  
17 379 maintaining the medical order' in 2017, to strengthen security of hospital.  
18  
19 380 However, since these policies served as instructions rather than mandatory  
20  
21  
22 381 regulations, insufficient resource had constrained the implementation in all  
23  
24  
25 382 hospitals. Security measures are not only an intervention that could prevent  
26  
27 383 healthcare professionals from WPV, but also may enhance the sense of safety as a  
28  
29  
30 384 kind of organizational support. Hospitals should implement specific scale of  
31  
32  
33 385 security measures according to the actual situation. Most participants consider  
34  
35 386 anti-violence training useful. Although it could increase knowledge and boost  
36  
37  
38 387 confidence, the effect could not reduce of WPV incidents for long-term <sup>45</sup>. We  
39  
40 388 suggest that it is essential to make a complete and periodic curriculum for  
41  
42  
43 389 repetitive training. Improving environment, such as enhancing lighting and  
44  
45  
46 390 installing cameras, should be considered as a useful measure. A previous study has  
47  
48 391 shown that working in a daring environment at night is a risk factor of WPV <sup>46</sup>.  
49  
50  
51 392 Camera installation is required by Occupational Safety and Health Administration  
52  
53 393 (OSHA)<sup>47</sup>, which may be a deterrence for committing violence. Using protective  
54  
55  
56 394 equipment is not a popular intervention. In the period of frequent WPV in China,  
57  
58 395 there are indeed some healthcare workers wearing a helmet at work <sup>48</sup>. However,  
59  
60

1  
2  
3  
4 396 this may lead to a more tense doctor-patient relationship. Participants do not trust  
5  
6  
7 397 patient examination and restriction to non-staff access. Due to large hospital  
8  
9  
10 398 scales and treatment numbers, there would be numerous patients admitted to  
11  
12 399 hospital. The process of patient examination and restriction of non-staff access  
13  
14 400 would not be serious enough, otherwise the crowded queue and longer waiting  
15  
16  
17 401 time may breed new contradictions. In addition, since there is no system or  
18  
19  
20 402 platform sharing the patient's information between each hospital, it is difficult to  
21  
22 403 verify WPV history strictly. Although previous studies have shown that work shift  
23  
24 404 is negatively associated with WPV <sup>19 33 35</sup>, changing the time of shift are treated as  
25  
26  
27 405 less useful. It may be better to enhance the protection during shift rather than  
28  
29  
30 406 changing the regulation.

31  
32 407 Due to the research purpose and background, most previous WPV studies were  
33  
34  
35 408 conducted in several hospitals, which has several advantages. Firstly, more  
36  
37  
38 409 samples could be collected to make a more reliable conclusion. In addition, the  
39  
40  
41 410 results could reflect common problems in a certain context. However, at the same  
42  
43  
44 411 time, it would neglect some specific factors or characteristics. The investigation  
45  
46  
47 412 conducted in a typical and representative hospital is conducive to examine the  
48  
49  
50 413 relation between specific factors or information and WPV, which could also be an  
51  
52  
53 414 effective reference of practical work for hospitals with similar features. Our study  
54  
55  
56 415 has exploratively examined WPV in multi-ethnicity area using PSM, and which  
57  
58  
59 416 method was conducive to control confounders and minimized the bias caused by  
60  
417 quantity gap. In addition, our study has given a complete report about WPV,



1  
2  
3  
4 418 including prevalence, influencing factor, healthcare professionals' response to  
5  
6 419 WPV, expected content and measure of anti-violence training, and healthcare  
7  
8  
9 420 professionals' evaluation of WPV interventions, which was helpful to interpret  
10  
11  
12 421 WPV from wider aspects.

## 13 14 422 **5. Limitations**

15  
16  
17 423 This study has a few limitations. First, since the respondents were asked to  
18  
19 424 report WPV that had taken place in the past 12 months, violence might not be  
20  
21  
22 425 adequately reported due to recall bias or reporting bias resulting from shame and  
23  
24 426 stigma. Second, the study exploratively examined the WPV in multi-ethnicity area  
25  
26  
27 427 but did not conduct in-depth research on the underlying cause by cultural factors.  
28  
29 428 Third, our study is limited to consider the temporality between the influencing  
30  
31  
32 429 factor and WPV, which makes it difficult to conclude the causation. In addition, the  
33  
34 430 clustering effect of WPV in several departments were not fully considered, which  
35  
36  
37 431 may affect the standard error of the results. Future research should investigate the  
38  
39  
40 432 perpetrators or patients, especially explore WPV by qualitative methods.

## 41 42 43 433 **6. Conclusion**

44  
45 434 Our study investigated WPV in a hospital located in a multi-ethnicity area.  
46  
47  
48 435 Ethnic minority healthcare professionals may be more likely to suffer WPV and  
49  
50  
51 436 have different responses to WPV compared to Han. Additionally, we broke through  
52  
53  
54 437 the single focus of existing WPV research and explored WPV from a more  
55  
56 438 comprehensive perspective including prevalence, influencing factors, response to  
57  
58  
59 439 WPV, expected anti-violence training measures and contents, and evaluation of  
60

1  
2  
3  
4 440 interventions, which may provide a practical reference to hospitals with similar  
5  
6 441 characteristics. Moreover, WPV research should be conducted in multi-ethnicity  
7  
8 442 areas from the perspective of the perpetrator or patients, especially by qualitative  
9  
10 443 methods.  
11  
12  
13  
14 444

15  
16  
17 445 **Contributors :** Mingli Jiao, Jingfu Mao and Qunhong Wu contributed to the  
18  
19 446 conception and design of the study. Haonan Jia, Huiying Fang, Yameng Wang,  
20  
21 447 Kexin Jiang, Yuanheng Li, Ying Wang, Lifeng Wei, and Gangyu Zhang contributed  
22  
23 448 to the data collection. Omar Yacouba Ismael, Haonan Jia and Xiaowen Jia  
24  
25 449 contributed to literature search and data quality control. Huiying Fang and  
26  
27 450 Haonan Jia, Ruohui Chen did the statistical analysis and drafted the original  
28  
29 451 manuscript. Mingli Jiao revised the manuscript for important intellectual content.  
30  
31 452 Ruohui Chen, Kexin Jiang and Jingqun Li prepared the manuscript and  
32  
33 453 supplementary material. All authors contributed to data interpretation and  
34  
35 454 rewriting the paper.  
36  
37  
38  
39  
40  
41  
42

43 455 Haonan Jia, Huiying Fang, Ruohui Chen contributed equally to this work. Mingli  
44  
45 456 Jiao and Jingfu Mao are corresponding author.  
46  
47  
48  
49

#### 50 458 **Funding**

51  
52  
53 459 This study was funded by the Natural Science Foundation of China (Grant  
54  
55 460 No.71273002, 71473064); New Century Excellent Talents of University from the  
56  
57 461 Ministry of Education, China (Grant No.1252-NCET02); the China Postdoctoral  
58  
59  
60

1  
2  
3  
4 462 Science Foundation (Grant No.2015M570211, 2016T90181); the Heilongjiang  
5  
6 463 Provincial Association of Social Sciences (Grant No.15058), and the Collaborative  
7  
8  
9 464 Innovation Centre of Social Risks Governance in Health; Think Tank of Public  
10  
11 465 Health Security and Health Reform of Heilongjiang Province.

12  
13  
14 466 **Consent for publication:** Not applicable.

15  
16  
17 467 **Competing interests:** The authors declare that they have no competing interests.

18  
19 468 **Acknowledgements:** We thank the management office and all the participants for  
20  
21  
22 469 data collection.

23  
24  
25 470 **Data sharing statement:** Data are available from the corresponding author and  
26  
27 471 investigation hospital upon reasonable request.

## 28 29 30 472 **Reference**

- 31  
32 473 1. Framework guidelines for addressing workplace violence in the health sector.  
33  
34 474 Geneva, Switzerland,: ISBN, 2002.
- 35  
36 475 2. Zhao M, Jiang K, Yang L, et al. The Big Data Research on Violence against Doctors:  
37  
38 476 Based on the Media Report from 2000 to 2015 *Medicine & Philosophy*  
39  
40 477 2017;38(01):89-93.
- 41  
42 478 3. Liqun Y, Shoufang J, Xiaoxia T, et al. Analysis of prevalence of workplace violence  
43  
44 479 in staff of two hospitals in Tangshan. *Modern Preventive Medicine*  
45  
46 480 2006;33(2):147-52.
- 47  
48 481 4. Jing G, Pei H, Xiaoli Z, et al. The investigation on coping capacity of nursing staff  
49  
50 482 to medical workplace violence. *Chinese Nursing Management*  
51  
52 483 2015;15(6):688-91.
- 53  
54 484 5. Lin H, Yan J, Jian W, et al. A survey on effect of workplace violence in hospital on  
55  
56 485 work-related stress of medical staffs. *Chongqing Medicine*  
57  
58 486 2012;41(06):590-92.
- 59  
60 487 6. Chen ZH, Wang SY, Jing CX, et al. Prevalence of workplace violence in staff of two

- 1  
2  
3  
4 488 hospitals in Guangzhou. *Chinese Journal of Preventive Medicine*  
5  
6 489 2003;37(5):358.
- 7  
8 490 7. Liu H, Zhao S, Jiao M, et al. Extent, nature, and risk factors of workplace violence  
9  
10 491 in public tertiary hospitals in China: a cross-sectional survey. *International*  
11  
12 492 *Journal of Environmental Research and Public Health* 2015;12(6):6801-17.
- 13  
14 493 8. Zhao S, Liu H, Ma H, et al. Coping with Workplace Violence in Healthcare Settings:  
15  
16 494 Social Support and Strategies. *International journal of environmental*  
17  
18 495 *research and public health* 2015;12:14429-44.
- 19  
20 496 9. Coate S, Loury GC. Will Affirmative-Action Policies Eliminate Negative  
21  
22 497 Stereotypes? *The American Economic Review* 1993;83(5):1220-40.
- 23  
24 498 10. Hasmath R, Ho B. Job acquisition, retention, and outcomes for ethnic minorities  
25  
26 499 in urban China. *Eurasian Geography and Economics* 2015;56(1):24-43.
- 27  
28 500 11. White paper on medical practice in China: Chinese Medical Doctor Association,  
29  
30 501 2017.
- 31  
32 502 12. Ji H, Tian K, Yunsen Z. Studying on the guarantee of medical professionals' right  
33  
34 503 of rest and construction of harmonious doctor-patient relationship. *The*  
35  
36 504 *Chinese Health Service Management* 2016;33(05):368-70.
- 37  
38 505 13. Tak S, Sweeney MH, Alterman T, et al. Workplace Assaults on Nursing  
39  
40 506 Assistants in US Nursing Homes: A Multilevel Analysis. *American Journal of*  
41  
42 507 *Public Health* 2010;100(10):1938-45.
- 43  
44 508 14. Cai W, Deng L, Liu M, et al. Antecedents of Medical Workplace Violence in South  
45  
46 509 China. *Journal of Interpersonal Violence* 2011;26(2):312-27.
- 47  
48 510 15. Liu Y, Deng L, Min Y. Investigation of psychological violence at hospital  
49  
50 511 workplace in Guangzhou. *Chinese Journal of Public Health*  
51  
52 512 2009;25(09):1050-51.
- 53  
54 513 16. Qianqian W, Lei X. Investigation of workplace violence and influencing factors  
55  
56 514 of nurses in Pingyang County General Hospital. *Journal of Traditional*  
57  
58 515 *Chinese Medicine Management* 2016;24(17):18-20.
- 59  
60 516 17. Lulu S. The research of prevention of hospital workplace violence based on  
517 517 game theory – through the analysis of hospital, patient, and media as game

- 1  
2  
3  
4 518 role players. Jilin University, 2014.
- 5  
6 519 18. Jiao M, Ning N, Li Y, et al. Workplace violence against nurses in Chinese  
7  
8 520 hospitals: a cross-sectional survey. *Bmj Open* 2015;5(3):e006719.
- 9  
10 521 19. Sun P, Zhang X, Sun Y, et al. Workplace Violence against Health Care Workers  
11  
12 522 in North Chinese Hospitals: A Cross-Sectional Survey. *International Journal*  
13  
14 523 *of Environmental Research and Public Health* 2017;14(1):96.
- 15  
16 524 20. Baukje M, Ryan H, Anita LL, et al. Prevalence of abusive encounters in the  
17  
18 525 workplace of family physicians: a minor, major, or severe problem?  
19  
20 526 *Canadian Family Physician Médecin De Famille Canadien* 2010;56(3):e101.
- 21  
22 527 21. Campbell JC, Jill Theresa M, Joan K, et al. Workplace violence: prevalence and  
23  
24 528 risk factors in the safe at work study. *Journal of Occupational &*  
25  
26 529 *Environmental Medicine* 2011;53(1):82.
- 27  
28 530 22. Lyn Q. Workplace bullying in junior doctors: questionnaire survey. *British*  
29  
30 531 *Medical Journal* 2002;324(7342):878-79.
- 31  
32 532 23. Jane B, Geoff P. At breaking point: A survey of the wellbeing and working lives  
33  
34 533 of nurses in 2005. London, England: Royal College of Nursing, 2006.
- 35  
36 534 24. Giga SI, Hoel H, Lewis D. A Review of Black and Minority Ethnic (BME)  
37  
38 535 Employee Experiences of Workplace Bullying. 2008
- 39  
40 536 25. Keshet Y, Popper-Giveon A. Race-based experiences of ethnic minority health  
41  
42 537 professionals: Arab physicians and nurses in Israeli public healthcare  
43  
44 538 organizations. *Ethnicity & Health* 2017;23(4):1-18.
- 45  
46 539 26. Dehghan-Chaloshtari S, Ghodousi A. Factors and Characteristics of Workplace  
47  
48 540 Violence Against Nurses: A Study in Iran. *Journal of Interpersonal Violence*  
49  
50 541 2017:088626051668317.
- 51  
52 542 27. Kang C. Cultural differences between Tibetans and ethnic Han Chinese in  
53  
54 543 ultimatum bargaining experiments. *Journal of Political Economy*  
55  
56 544 2009;25(1):78-84.
- 57  
58 545 28. Perloff RM, Bonder B, Ray GB, et al. Doctor-patient communication, cultural  
59  
60 546 competence, and minority health: Theoretical and empirical perspectives.  
547 547 *American Behavioral Scientist* 2006;49(6):835-52.

- 1  
2  
3  
4 548 29. Beech B, Leather P. Workplace violence in the health care sector: A review of  
5 549 staff training and integration of training evaluation models. *Aggression and*  
6  
7 550 *Violent Behavior* 2006;11(1):27-43.
- 8  
9 551 30. Hahn S, Zeller A, Needham I, et al. Patient and visitor violence in general  
10  
11 552 hospitals: A systematic review of the literature. *Aggression and Violent*  
12  
13 553 *Behavior* 2008;13(6):431-41.
- 14  
15 554 31. Siying W, Wei Z, Huangyuan L, et al. Workplace violence and influencing factors  
16  
17 555 among medical professionals in China. *American Journal of Industrial*  
18  
19 556 *Medicine* 2012;55(11):1000-08.
- 20  
21 557 32. Algwaiz WM, Alghanim SA. Violence exposure among health care professionals  
22  
23 558 in Saudi public hospitals. A preliminary investigation. *Saudi Medical*  
24  
25 559 *Journal* 2012;33(1):76.
- 26  
27 560 33. Carluccio A, Knychala V, Marshall C. Violence against frontline NHS staff.  
28  
29 561 London: NHS Security Management Service, 2010.
- 30  
31 562 34. Flannery RB, Walker AP. Characteristics of four types of patient assaults: six  
32  
33 563 year analysis of the Assaulted Staff Action Program (ASAP). *Psychiatric*  
34  
35 564 *Quarterly* 2011;82(1):11-21.
- 36  
37 565 35. Kitaneh M, Hamdan M. Workplace violence against physicians and nurses in  
38  
39 566 Palestinian public hospitals: a cross-sectional study. *Bmc Health Services*  
40  
41 567 *Research* 2012;12(1):1-9.
- 42  
43 568 36. Arimatsu M, Wada K, Yoshikawa T, et al. An epidemiological study of work-  
44  
45 569 related violence experienced by physicians who graduated from a medical  
46  
47 570 school in Japan. *Journal of Occupational Health* 2008;50(5):357-61.
- 48  
49 571 37. Hills D, Joyce C. A review of research on the prevalence, antecedents,  
50  
51 572 consequences and prevention of workplace aggression in clinical medical  
52  
53 573 practice. *Aggression and Violent Behavior* 2013;18(5):554-69.
- 54  
55 574 38. Coker AL, Smith PH, Thompson MP, et al. Social support protects against the  
56  
57 575 negative effects of partner violence on mental health. *Journal of Women's*  
58  
59 576 *Health & Gender-based Medicine* 2002;11(5):465-76.
- 60 577 39. Arnetz JE, Arnetz BB. Implementation and evaluation of a practical

- 1  
2  
3  
4 578 intervention programme for dealing with violence towards health care  
5  
6 579 workers. *Journal of Advanced Nursing* 2000;31(3):668-80.
- 7  
8 580 40. Ramezaninia J, Naghibi Sistani M, Ahangari Z, et al. Comparison of the effect of  
9  
10 581 toothbrushing education via video, lecture and pamphlet on the dental  
11  
12 582 plaque index of 12-year-old children. *Children* 2018;5(4):50.
- 13  
14 583 41. Li F, Jiang F, Jin X-M, et al. Cost-efficiency assessment of 3 different pediatric  
15  
16 584 first-aid training models for caregivers and teachers in Shanghai. *Pediatric  
17  
18 585 emergency care* 2011;27(5):357-60.
- 19  
20 586 42. Lees A, Rock W. A Comparison between Written, Verbal, and Videotape Rral  
21  
22 587 Hygiene Instruction for Patients with Fixed Appliances. *British Journal of  
23  
24 588 Orthodontics* 2000;27(4):323-28.
- 25  
26 589 43. Meloy JR. Pathologies of attachment, violence, and criminality. *Handbook of  
27  
28 590 Psychology* 2003:509-26.
- 29  
30 591 44. Meloy JR. The psychopathic mind: Origins, dynamics, and treatment: Rowman  
31  
32 592 & Littlefield 1988.
- 33  
34 593 45. Heckemann B, , Zeller A, , Hahn S, , et al. The effect of aggression management  
35  
36 594 training programmes for nursing staff and students working in an acute  
37  
38 595 hospital setting. A narrative review of current literature. *Nurse Education  
39  
40 596 Today* 2015;35(1):212-19.
- 41  
42 597 46. Moore PV, Simonowitz JA, Rigdon JE, et al. Workplace violence: prevention  
43  
44 598 efforts by the occupational health nurse. *AAOHN Journal* 1997;45(6):305-  
45  
46 599 18.
- 47  
48 600 47. Guidelines for preventing workplace violence for health care social service  
49  
50 601 workers. Guidelines for preventing workplace violence for health care  
51  
52 602 social service workers: Occupational Safety Health Administration 2004.
- 53  
54 603 48. Healthcare workers wear helmets to work for safety: Sina; 2006 [Available  
55  
56 604 from:[http://news.sina.com.cn/s/p/2006-12-  
57  
58 605 25/064711876752.shtml](http://news.sina.com.cn/s/p/2006-12-25/064711876752.shtml)2006.
- 59  
60 606



**STROBE 2007 (v4) Statement—Checklist of items that should be included in reports of *cross-sectional studies***

| Section/Topic                | Item # | Recommendation                                                                                                                                                                       | Reported on page # |
|------------------------------|--------|--------------------------------------------------------------------------------------------------------------------------------------------------------------------------------------|--------------------|
| <b>Title and abstract</b>    | 1      | (a) Indicate the study's design with a commonly used term in the title or the abstract                                                                                               | 2                  |
|                              |        | (b) Provide in the abstract an informative and balanced summary of what was done and what was found                                                                                  | 2-3                |
| <b>Introduction</b>          |        |                                                                                                                                                                                      |                    |
| Background/rationale         | 2      | Explain the scientific background and rationale for the investigation being reported                                                                                                 | 3-6                |
| Objectives                   | 3      | State specific objectives, including any prespecified hypotheses                                                                                                                     | 6                  |
| <b>Methods</b>               |        |                                                                                                                                                                                      |                    |
| Study design                 | 4      | Present key elements of study design early in the paper                                                                                                                              | 6                  |
| Setting                      | 5      | Describe the setting, locations, and relevant dates, including periods of recruitment, exposure, follow-up, and data collection                                                      | 6-8                |
| Participants                 | 6      | (a) Give the eligibility criteria, and the sources and methods of selection of participants                                                                                          | 8                  |
| Variables                    | 7      | Clearly define all outcomes, exposures, predictors, potential confounders, and effect modifiers. Give diagnostic criteria, if applicable                                             | 7-8                |
| Data sources/<br>measurement | 8*     | For each variable of interest, give sources of data and details of methods of assessment (measurement). Describe comparability of assessment methods if there is more than one group | 7-9                |
| Bias                         | 9      | Describe any efforts to address potential sources of bias                                                                                                                            | -                  |
| Study size                   | 10     | Explain how the study size was arrived at                                                                                                                                            | 8                  |
| Quantitative variables       | 11     | Explain how quantitative variables were handled in the analyses. If applicable, describe which groupings were chosen and why                                                         | 8-9                |
| Statistical methods          | 12     | (a) Describe all statistical methods, including those used to control for confounding                                                                                                | 8-9                |
|                              |        | (b) Describe any methods used to examine subgroups and interactions                                                                                                                  | -                  |
|                              |        | (c) Explain how missing data were addressed                                                                                                                                          | -                  |
|                              |        | (d) If applicable, describe analytical methods taking account of sampling strategy                                                                                                   | -                  |
|                              |        | (e) Describe any sensitivity analyses                                                                                                                                                | -                  |
| <b>Results</b>               |        |                                                                                                                                                                                      |                    |



|                          |     |                                                                                                                                                                                                              |       |
|--------------------------|-----|--------------------------------------------------------------------------------------------------------------------------------------------------------------------------------------------------------------|-------|
| Participants             | 13* | (a) Report numbers of individuals at each stage of study—eg numbers potentially eligible, examined for eligibility, confirmed eligible, included in the study, completing follow-up, and analysed            | 8     |
|                          |     | (b) Give reasons for non-participation at each stage                                                                                                                                                         | 8     |
|                          |     | (c) Consider use of a flow diagram                                                                                                                                                                           | -     |
| Descriptive data         | 14* | (a) Give characteristics of study participants (eg demographic, clinical, social) and information on exposures and potential confounders                                                                     | 10    |
|                          |     | (b) Indicate number of participants with missing data for each variable of interest                                                                                                                          | -     |
| Outcome data             | 15* | Report numbers of outcome events or summary measures                                                                                                                                                         | 10-20 |
| Main results             | 16  | (a) Give unadjusted estimates and, if applicable, confounder-adjusted estimates and their precision (eg, 95% confidence interval). Make clear which confounders were adjusted for and why they were included | 10-20 |
|                          |     | (b) Report category boundaries when continuous variables were categorized                                                                                                                                    | 10-16 |
|                          |     | (c) If relevant, consider translating estimates of relative risk into absolute risk for a meaningful time period                                                                                             | -     |
| Other analyses           | 17  | Report other analyses done—eg analyses of subgroups and interactions, and sensitivity analyses                                                                                                               | -     |
| <b>Discussion</b>        |     |                                                                                                                                                                                                              |       |
| Key results              | 18  | Summarise key results with reference to study objectives                                                                                                                                                     | 21    |
| Limitations              | 19  | Discuss limitations of the study, taking into account sources of potential bias or imprecision. Discuss both direction and magnitude of any potential bias                                                   | 26-27 |
| Interpretation           | 20  | Give a cautious overall interpretation of results considering objectives, limitations, multiplicity of analyses, results from similar studies, and other relevant evidence                                   | 21-26 |
| Generalisability         | 21  | Discuss the generalisability (external validity) of the study results                                                                                                                                        | 27    |
| <b>Other information</b> |     |                                                                                                                                                                                                              |       |
| Funding                  | 22  | Give the source of funding and the role of the funders for the present study and, if applicable, for the original study on which the present article is based                                                | 28    |

\*Give information separately for cases and controls in case-control studies and, if applicable, for exposed and unexposed groups in cohort and cross-sectional studies.

**Note:** An Explanation and Elaboration article discusses each checklist item and gives methodological background and published examples of transparent reporting. The STROBE checklist is best used in conjunction with this article (freely available on the Web sites of PLoS Medicine at <http://www.plosmedicine.org/>, Annals of Internal Medicine at <http://www.annals.org/>, and Epidemiology at <http://www.epidem.com/>). Information on the STROBE Initiative is available at [www.strobe-statement.org](http://www.strobe-statement.org).

# BMJ Open

## Workplace violence against healthcare professionals in multi-ethnicity area: A cross-sectional study in southwest China

|                                 |                                                                                                                                                                                                                                                                                                                                                                                                                                                                                                                                                                                                                                                                                                                                                                                                                                                                                                                                                                                                                                                                                                                                                                                                                                                                                                                                                                                                                                         |
|---------------------------------|-----------------------------------------------------------------------------------------------------------------------------------------------------------------------------------------------------------------------------------------------------------------------------------------------------------------------------------------------------------------------------------------------------------------------------------------------------------------------------------------------------------------------------------------------------------------------------------------------------------------------------------------------------------------------------------------------------------------------------------------------------------------------------------------------------------------------------------------------------------------------------------------------------------------------------------------------------------------------------------------------------------------------------------------------------------------------------------------------------------------------------------------------------------------------------------------------------------------------------------------------------------------------------------------------------------------------------------------------------------------------------------------------------------------------------------------|
| Journal:                        | <i>BMJ Open</i>                                                                                                                                                                                                                                                                                                                                                                                                                                                                                                                                                                                                                                                                                                                                                                                                                                                                                                                                                                                                                                                                                                                                                                                                                                                                                                                                                                                                                         |
| Manuscript ID                   | bmjopen-2020-037464.R2                                                                                                                                                                                                                                                                                                                                                                                                                                                                                                                                                                                                                                                                                                                                                                                                                                                                                                                                                                                                                                                                                                                                                                                                                                                                                                                                                                                                                  |
| Article Type:                   | Original research                                                                                                                                                                                                                                                                                                                                                                                                                                                                                                                                                                                                                                                                                                                                                                                                                                                                                                                                                                                                                                                                                                                                                                                                                                                                                                                                                                                                                       |
| Date Submitted by the Author:   | 27-Jun-2020                                                                                                                                                                                                                                                                                                                                                                                                                                                                                                                                                                                                                                                                                                                                                                                                                                                                                                                                                                                                                                                                                                                                                                                                                                                                                                                                                                                                                             |
| Complete List of Authors:       | Jia, Haonan; Harbin Medical University, Department of Health Policy and Hospital Management<br>Fang, Huiying; Qingdao Women and Children's Hospital, President's Office<br>Chen, Ruohui; Harbin Medical University, Department of Health Policy and Hospital Management<br>Jiao, Mingli; Harbin Medical University, Department of Health Policy and Hospital Management; Chinese Academy of Social Sciences<br>Wei, Lifeng; Harbin Medical University, Department of Health Policy and Hospital Management<br>Zhang, Gangyu; Harbin Medical University, Department of Health, Policy and Hospital Management<br>Li, Yuanheng; Harbin Medical University, Department of Health Policy and Hospital Management<br>Wang, Ying; Harbin Medical University, Department of Health Policy and Hospital Management<br>Wang, Yameng; Harbin Medical University, Department of Health Policy and Hospital Management<br>Jiang, Kexin; General Hospital of Heilongjiang Agricultural Reclamation, Medical department<br>Li, Jingqun; No 1 People's Hospital of Heihe, Department of Cardiology<br>Jia, Xiaowen; No 1 People's Hospital of Heihe, Department of General Surgery<br>Ismael, Omar Yacouba; Harbin Medical University, Department of Health Policy and Hospital Management<br>Mao, Jingfu; Harbin Medical University, Department of Human Resource Management<br>Wu, Qunhong; Harbin Medical University, Department of Social Medicine |
| <b>Primary Subject Heading</b>: | Public health                                                                                                                                                                                                                                                                                                                                                                                                                                                                                                                                                                                                                                                                                                                                                                                                                                                                                                                                                                                                                                                                                                                                                                                                                                                                                                                                                                                                                           |
| Secondary Subject Heading:      | Medical management, Occupational and environmental medicine                                                                                                                                                                                                                                                                                                                                                                                                                                                                                                                                                                                                                                                                                                                                                                                                                                                                                                                                                                                                                                                                                                                                                                                                                                                                                                                                                                             |
| Keywords:                       | Health & safety < HEALTH SERVICES ADMINISTRATION & MANAGEMENT, PUBLIC HEALTH, Health policy < HEALTH SERVICES ADMINISTRATION & MANAGEMENT                                                                                                                                                                                                                                                                                                                                                                                                                                                                                                                                                                                                                                                                                                                                                                                                                                                                                                                                                                                                                                                                                                                                                                                                                                                                                               |
|                                 |                                                                                                                                                                                                                                                                                                                                                                                                                                                                                                                                                                                                                                                                                                                                                                                                                                                                                                                                                                                                                                                                                                                                                                                                                                                                                                                                                                                                                                         |

1  
2  
3  
4  
5  
6  
7  
8  
9  
10  
11  
12  
13  
14  
15  
16  
17  
18  
19  
20  
21  
22  
23  
24  
25  
26  
27  
28  
29  
30  
31  
32  
33  
34  
35  
36  
37  
38  
39  
40  
41  
42  
43  
44  
45  
46  
47  
48  
49  
50  
51  
52  
53  
54  
55  
56  
57  
58  
59  
60





I, the Submitting Author has the right to grant and does grant on behalf of all authors of the Work (as defined in the below author licence), an exclusive licence and/or a non-exclusive licence for contributions from authors who are: i) UK Crown employees; ii) where BMJ has agreed a CC-BY licence shall apply, and/or iii) in accordance with the terms applicable for US Federal Government officers or employees acting as part of their official duties; on a worldwide, perpetual, irrevocable, royalty-free basis to BMJ Publishing Group Ltd ("BMJ") its licensees and where the relevant Journal is co-owned by BMJ to the co-owners of the Journal, to publish the Work in this journal and any other BMJ products and to exploit all rights, as set out in our [licence](#).

The Submitting Author accepts and understands that any supply made under these terms is made by BMJ to the Submitting Author unless you are acting as an employee on behalf of your employer or a postgraduate student of an affiliated institution which is paying any applicable article publishing charge ("APC") for Open Access articles. Where the Submitting Author wishes to make the Work available on an Open Access basis (and intends to pay the relevant APC), the terms of reuse of such Open Access shall be governed by a Creative Commons licence – details of these licences and which [Creative Commons](#) licence will apply to this Work are set out in our licence referred to above.

Other than as permitted in any relevant BMJ Author's Self Archiving Policies, I confirm this Work has not been accepted for publication elsewhere, is not being considered for publication elsewhere and does not duplicate material already published. I confirm all authors consent to publication of this Work and authorise the granting of this licence.

1 **Workplace violence against healthcare professionals in multi-**  
2 **ethnicity area: A cross-sectional study in southwest China**

3 Haonan Jia<sup>a\*</sup>, Huiying Fang<sup>b\*</sup>, Ruohui Chen<sup>a\*</sup>, Mingli Jiao<sup>a,c</sup>✉, Lifeng Wei<sup>a</sup>, Gangyu  
4 Zhang<sup>a</sup>, Yuanheng Li<sup>a</sup>, Ying Wang<sup>a</sup>, Yameng Wang<sup>a</sup>, Kexin Jiang<sup>d</sup>, Jingqun Li<sup>e</sup>,  
5 Xiaowen Jia<sup>f</sup>, Omar Yacouba Ismael<sup>a</sup>, Jingfu Mao<sup>g</sup>✉, Qunhong Wu<sup>h</sup>

6 *a Department of Health Policy and Hospital Management, Harbin Medical University,*  
7 *Nangang District, Harbin, China;*

8 *b President's Office, Qingdao Women and Children's Hospital, Shibei District,*  
9 *Qingdao, China;*

10 *c Chinese Academy of Social Science, Institute of Quantitative & Technical Economics,*  
11 *Dongcheng District, Beijing China;*

12 *d Medical department, General Hospital of Heilongjiang Agricultural Reclamation,*  
13 *Harbin 150088, China*

14 *e Department of Cardiology, No.1 People's Hospital of Heihe, Aihui District, Heihe,*  
15 *China;*

16 *f Department of General Surgery, No.1 People's Hospital of Heihe, Aihui District,*  
17 *Heihe, China;*

18 *g Department of Human Resource Management, Harbin Medical University, Nangang*  
19 *District, Harbin, China;*

20 *h Department of Social Medicine, Harbin Medical University, Nangang District,*  
21 *Harbin, China*

22 \*Contributed Equally

1  
2  
3  
4 **23 Corresponding author:**  
5

6  
7 24 Mingli Jiao, Harbin Medical University, 157 Baojian Road, Nangang District, Harbin,  
8  
9 25 Heilongjiang, 150086, China. Email: minglijiao@126.com. Tel:+86 13613675693  
10

11  
12 26 Jingfu Mao, Harbin Medical University, 157 Baojian Road, Nangang District, Harbin,  
13  
14 27 Heilongjiang, 150086, China. Email: mjfhyd@yeah.com. Tel:+86 13836134966  
15  
16

17 **28 Word count:** 3932  
18

19 **29 Abstract**  
20

21  
22 30 Objective: The purpose of this study is to examine workplace violence (WPV)  
23  
24 31 towards healthcare professionals in multi-ethnicity area of China, including  
25  
26 32 prevalence, influencing factors, healthcare professionals' response to WPV,  
27  
28 33 expected anti-violence training measures and content, and evaluation of WPV  
29  
30 34 interventions.  
31  
32

33  
34 35 Design: A cross-sectional study.  
35  
36

37  
38 36 Setting: A Grade III Class A hospital in the capital of Yunnan province, which is the  
39  
40 37 province with most kinds of ethnic minorities groups in China.  
41  
42

43  
44 38 Participants: In total, 2,036 healthcare professionals participated with a response  
45  
46 39 rate was 83.79%.  
47

48  
49 40 Results: The prevalence of physical and psychological violence was 5.4% and  
50  
51 41 43.7%, respectively. Healthcare professionals who were ethnic minorities were  
52  
53 42 more likely to experience psychological violence (OR=1.54, 95%CI=1.16-2.05).  
54

55  
56 43 After stratified by gender, males who were ethnic minorities suffered more  
57  
58 44 physical violence (OR=3.31, 95%CI=1.12-9.79), while females suffered  
59  
60

1  
2  
3  
4 45 psychological violence (OR=1.71, 95%CI=1.24-2.36). We also found a unique  
5  
6 46 work situation in China—overtime duty on call work (6 pm-7 am) was a risk factor  
7  
8  
9 47 of psychological violence (OR=1.40, 95%CI=1.02-1.93). Ethnic minority  
10  
11 48 healthcare professionals less likely ordered perpetrators to stop or reported to  
12  
13  
14 49 superiors when facing psychological violence. Ethnic minority healthcare  
15  
16  
17 50 professionals are more interested in receiving training of force skills and self-  
18  
19  
20 51 defense. Both Han and ethnic minority participants considered security measures  
21  
22 52 as the most useful intervention, while changing the time of shift as the most  
23  
24  
25 53 useless one.

26  
27 54 Conclusion: Our study comprehensively described WPV towards healthcare  
28  
29  
30 55 professionals in multi-ethnicity minority area. More WPV research conducted in  
31  
32 56 multi-ethnicity area are needed.

33  
34  
35 57 **Keyword:** Workplace violence; healthcare professionals; multi-ethnicity area

36  
37  
38 58 **Strengths and limitations**

- 39  
40 59 ✧ Although lots of studies investigated WPV in hospital, few of them were  
41  
42 60 conducted in multi-ethnicity minority area.
- 43  
44 61 ✧ Previous studies paid attention to a single part of WPV whereas our study  
45  
46 62 describes WPV comprehensively including prevalence, influencing factor,  
47  
48 63 response to WPV.
- 49  
50 64 ✧ Due to recall bias or reporting bias resulting from shame and stigma, the  
51  
52 65 number of violent events in the past 12 months may be underestimated.
- 53  
54 66 ✧ Our study did not explain WPV using cultural factors, which further studies  
55  
56  
57  
58  
59  
60

1  
2  
3  
4 67 can investigate.  
5

## 68 **1. Introduction**

69 In December 2019, a doctor was brutally killed by a patient's family member in  
70 Beijing. Less than a month later, another doctor in Beijing hospital was stabbed  
71 and severely injured. These two cases once again drew great attention to the safety  
72 of healthcare professionals in the Chinese society.

73 Workplace violence (WPV) was defined as "incidents where employees are  
74 abused, threatened, assaulted or subject to other offensive acts or behaviors in  
75 circumstances related to their work", which includes two types: (1) physical  
76 violence (e.g., beating, kicking, slapping, stabbing, shooting, pushing, biting, and  
77 pinching) and (2) psychological violence (e.g., threat of physical force against  
78 another person or group that can result in harm to physical, mental, spiritual,  
79 moral, or social development)<sup>1</sup>. WPV towards healthcare professionals is an  
80 extremely serious problem in China, which is happening for a long time. There  
81 were less than 290 severe WPV towards healthcare workers reported by media  
82 from 2000 to 2015<sup>2</sup>. The seriousness of WPV towards healthcare professionals in  
83 China leads to great attention from researchers. Most of researches that studied  
84 WPV prevalence of China were conducted in the area where the Han people (the  
85 main ethnic group in China) mainly live and rates of physical and psychological  
86 violence were 6.4%–35.4% and 54.4%–79.8%, respectively<sup>3-8</sup>. However, there  
87 were few WPV studies conducted in multi-ethnicity area of China. According to the  
88 latest national census in 2010, ethnic minorities account for 8.49% of the total



1  
2  
3  
4 89 population in China. In multi-ethnicity area, the proportion and ethnic diversity of  
5  
6 90 both ethnic minority patients and healthcare professionals is higher. In addition,  
7  
8  
9 91 there is preferential treatment policy in education for Chinese ethnic minorities  
10  
11 92 (lower threshold to receive high level of education), which may make ethnic  
12  
13  
14 93 minority workers' capabilities undervalued <sup>9 10</sup>. However, since healthcare  
15  
16  
17 94 professionals require high level of skill and education, it is still unknown whether  
18  
19  
20 95 the ethnic minority healthcare professionals' ability and skill would be  
21  
22 96 undervalued that can lead to patients' distrust with even more WPV occurrence. It  
23  
24  
25 97 is essential to provide more information of WPV in the multi-ethnicity area thus  
26  
27 98 conducting specific interventions. In addition, limited studies from other counties  
28  
29  
30 99 and regions focus on WPV towards healthcare professionals in multi-ethnicity  
31  
32  
33 100 areas.

34  
35 101 Although many studies have investigated the influence factor of WPV towards  
36  
37 102 healthcare professionals, an essential factor has been neglected. In China, more  
38  
39  
40 103 than 90% healthcare professionals work more than eight hours a day, which  
41  
42  
43 104 makes overtime work a common phenomenon <sup>11</sup>. Since the medical system  
44  
45  
46 105 requires healthcare professionals in charge to be responsible for their patients at  
47  
48  
49 106 any time, duty on call has become a form of overtime work. Healthcare workers  
50  
51 107 need to be on 24 hours standby and be able to return to hospital if patients are in  
52  
53  
54 108 an acute or severe situation, even when they have already got off work or having  
55  
56 109 a rest <sup>12</sup>. Previous studies found that workload was associated with WPV  
57  
58  
59 110 victimization <sup>13 14</sup>. However, limited WPV studies focused on relationship between  
60

1  
2  
3  
4 111 WPV experience and the exact form of overtime.  
5

6 112 Most previous WPV studies have only investigated a part of WPV, such as  
7  
8  
9 113 prevalence, influencing factors, or interventions. In this study, we aim to  
10  
11 114 investigate WPV in a general hospital of multi-ethnicity area, including the  
12  
13  
14 115 prevalence, influencing factors, response to WPV and evaluation of WPV  
15  
16  
17 116 intervention, which could not only interpret WPV from a broader perspective, but  
18  
19  
20 117 also provide more reference for practice.  
21

## 22 118 **2. Methods**

### 23 24 25 119 *2.1 Study population*

26  
27 120 Yunnan, located in southwestern border of China, has the greatest diversity of  
28  
29  
30 121 ethnic minorities in China, containing 52 of 56 ethnic groups (51 ethnic minority  
31  
32  
33 122 groups and Han). In 2017, 33.6% residents in Yunnan were ethnic minority groups.  
34

35 123 We conducted a retrospective survey in a Grade III Class A hospital in Kunming,  
36  
37  
38 124 the capital of Yunnan Province. The hospital was founded in 1939 and is the first  
39  
40  
41 125 Grade III Class A hospital in Yunnan Province. It is one of the most capable general  
42  
43  
44 126 hospitals in Yunnan, containing 2,400 open beds and over 2 million annual total  
45  
46  
47 127 visits. Around 18.6% of the hospital's employees were ethnic minorities at the  
48  
49  
50 128 time of the study. As a medical center in the province, it has a wide radiation range,  
51  
52  
53 129 and patients from all over the province come to the hospital seeking medical  
54  
55  
56 130 treatment.

### 57 131 *2.2 Questionnaire*

58 132 A questionnaire developed jointly by the International Labor Office (ILO),  
59  
60

1  
2  
3  
4 133 International Council of Nurses (ICN), World Health Organization (WHO), and  
5  
6 134 Public Services International (PSI) in 2003 was used to measure WPV <sup>1</sup>. First, we  
7  
8  
9 135 asked for permission to use the questionnaire from the ILO and WHO. Thereafter,  
10  
11  
12 136 we translated it into Mandarin Chinese and back translated it into English to verify  
13  
14 137 the accuracy of the Mandarin version. After this translation processed, 17 experts  
15  
16  
17 138 in the field of healthcare were invited to assess the effectiveness of the  
18  
19  
20 139 measurement tools, including the applicability of culture and the appropriateness  
21  
22  
23 140 of language. We selected 79 medical staff to form a group and conducted a two-  
24  
25 141 week test-retest reliability test (0.83).

26  
27 142 The questionnaire included the following sections: (1) demographics (e.g.,  
28  
29  
30 143 gender, age, education, ethnicity, occupation) and work status (e.g., shift work,  
31  
32  
33 144 overtime duty on call work, participation in anti-violence training, anxiety  
34  
35 145 regarding WPV); (2) experience of physical violence in the past 12 months (i.e.,  
36  
37  
38 146 intentional behavior that harms healthcare workers physically); (3) experience of  
39  
40  
41 147 psychological violence in the past 12 months (i.e., verbal abuse, threatening events,  
42  
43  
44 148 and sexual harassment); (4) healthcare professionals' response to physical  
45  
46  
47 149 violence and psychological violence; (5) the expected measures (e.g., leaflets,  
48  
49  
50 150 video, lecture) and content of anti-violence training (e.g., WPV cognition, self-  
51  
52  
53 151 defense; (6) the evaluation of usefulness of WPV interventions.

### 53 152 *2.3 Sample and data collection*

54  
55  
56 153 First, we obtained permission from the hospital management office and human  
57  
58  
59 154 resource department to collect employee's information in the hospital. Thereafter,  
60

1  
2  
3  
4 155 the person in charge of each unit issued a questionnaire to the staff and informed  
5  
6 156 them of the instructions and precautions. The study subjects included doctors,  
7  
8  
9 157 nurses, medical technicians who participated voluntarily and remained  
10  
11  
12 158 anonymous.

13  
14 159 The respondents were asked to provide their experience of WPV in the previous  
15  
16  
17 160 12 months, therefore, we excluded employees who met any of the following  
18  
19  
20 161 criteria: (1) less than 1 year of work experience in this hospital; (2) short-term  
21  
22 162 secondment or training (less than 12 months); (3) personnel who did not come to  
23  
24  
25 163 work during the study period due to traveling, training, vacation, and so on.

26  
27 164 The questionnaire had to be completed by employees themselves and could not  
28  
29  
30 165 be answered by any other person. The time of data collection ranged from July to  
31  
32  
33 166 October 2017. A total of 2,036 valid questionnaires were collected, and the  
34  
35 167 effective response rate was 83.79%.

#### 36 37 168 *2.4 Data analysis*

38  
39  
40 169 Descriptive statistics were used to summarize the demographic characteristics,  
41  
42  
43 170 prevalence of physical and psychological violence and the response to WPV  
44  
45  
46 171 between Han and ethnic minority participants. Chi-square test and Fisher's exact  
47  
48  
49 172 were used to compare the difference of response to WPV between Han and ethnic  
50  
51 173 minority healthcare workers.

52  
53 174 Since ethnic minority participants were almost 1/5 of Han participants in our  
54  
55  
56 175 data collection, the result may be biased if we used the original data to conduct  
57  
58  
59 176 logistic regression. To control confounders and to balance the number of Han and  
60

1  
2  
3  
4 177 ethnic minority samples, propensity score matching (PSM) was used. The PSM  
5  
6 178 model used the ethnicity as a dependent variable, and age, gender, marriage status,  
7  
8  
9 179 educational background, and years of work experience as explanatory variables.  
10  
11 180 We matched the group of ethnic minority healthcare professionals (treatment  
12  
13  
14 181 group) to the group of Han healthcare professionals (control group) in a 1:2  
15  
16  
17 182 manner to create two groups. These two groups had similar explanatory variables  
18  
19 183 (age, gender, marriage status, educational background, years of work experience)  
20  
21  
22 184 and different dependent variable – ethnicity, which could control confounders and  
23  
24  
25 185 highlighted the comparison between Han and ethnic minority healthcare  
26  
27 186 professionals. After matching, a set of 960 cases were created, with 325 ethnic  
28  
29  
30 187 minority and 635 Han healthcare professionals. The matched set was used to  
31  
32  
33 188 identify the factors associated with WPV in hospitals using logistic regression.  
34  
35 189 Since the proportion of male and female was almost 1:3, we also conducted logistic  
36  
37  
38 190 regression stratified by gender.

39  
40 191 The data were entered using Epidata 3.1 and analyzed using IBM SPSS Statistics  
41  
42  
43 192 22.0. The significance level was set at 0.05.

### 44 45 193 *2.5 Ethics approval*

46  
47  
48 194 This study was reviewed and approved by the Research Ethics Committee of  
49  
50  
51 195 Harbin Medical University and the investigation hospital (Project Identification  
52  
53 196 Code: HMUIRB20160014). All the respondents were provided with informed  
54  
55  
56 197 consent, which described the purpose and method of data collection and kept the  
57  
58  
59 198 data confidential.  
60

199 *2.6 Patient and public involvement*

200 No patients were involved in the whole process of the research.

201 **3. Results**

202 *3.1 Demographic characteristics*

203 Table 1 shows the demographic details of the 509 men and 1,527 women who  
 204 participated in the study. Around 84% of respondents were of “Han ethnicity”,  
 205 while 16% were ethnic minorities. A majority of respondents were nurses (42.7%)  
 206 and physicians (31.5%), 12.5% were medical technology workers, the rest (11.6%)  
 207 held other positions. Most of the respondents (70.2%) worked in rotational shifts,  
 208 and 74.2% engaged in overtime work (from 6 pm to 7 am the next day), such as  
 209 overtime or emergency consultation. Over half reported high or extremely high  
 210 levels of anxiety regarding WPV (58.9%) and participated in anti-violence training  
 211 (67.5%). As for the prevalence of WPV, 43.7% of the respondents reported that  
 212 they had experienced psychological violence, while 5.4% reported physical  
 213 violence.

215 **Table 1. Demographic information and the prevalence of workplace violence**

216 (N=2036)

|               | n    | %     |
|---------------|------|-------|
| <b>Gender</b> |      |       |
| Male          | 509  | 25.0% |
| Female        | 1527 | 75.0% |

---

|                                 |      |       |
|---------------------------------|------|-------|
| <b>Age</b>                      |      |       |
| ≤30                             | 940  | 46.2% |
| 31–45                           | 789  | 38.8% |
| ≥46                             | 207  | 15.1% |
| <b>Marital status</b>           |      |       |
| Single                          | 603  | 29.6% |
| Married                         | 1389 | 68.2% |
| Divorced/widowed                | 44   | 2.2%  |
| <b>Education background</b>     |      |       |
| College graduates               | 448  | 22.0% |
| Bachelor                        | 1207 | 59.3% |
| Master's and above              | 381  | 18.7% |
| <b>Ethnicity</b>                |      |       |
| Han                             | 1711 | 84.0% |
| Minority                        | 325  | 16.0% |
| <b>Years of work experience</b> |      |       |
| 1–5                             | 570  | 28.0% |
| 6–10                            | 548  | 26.9% |
| 11–20                           | 413  | 20.3% |
| >20                             | 505  | 24.8% |
| <b>Profession</b>               |      |       |

---

---

|                               |      |       |
|-------------------------------|------|-------|
| Physician                     | 624  | 30.6% |
| Nurse                         | 869  | 42.7% |
| Medical technology            | 294  | 14.4% |
| Others                        | 249  | 12.3% |
| <b>Work in shift</b>          |      |       |
| Yes                           | 1429 | 70.2  |
| No                            | 607  | 29.8  |
| <b>Overtime duty on call</b>  |      |       |
| <b>work (6 pm-7 am)</b>       |      |       |
| Yes                           | 1510 | 74.2% |
| No                            | 526  | 25.8% |
| <b>Anxiety level</b>          |      |       |
| Never                         | 103  | 5.1%  |
| Low                           | 219  | 10.8% |
| Moderate                      | 513  | 25.2% |
| High                          | 360  | 17.7% |
| Extremely high                | 841  | 41.2% |
| <b>Anti-violence training</b> |      |       |
| Yes                           | 1374 | 67.5% |
| No                            | 662  | 32.5% |
| <b>Physical violence</b>      |      |       |
| Yes                           | 110  | 5.4%  |

---



|                               |      |       |
|-------------------------------|------|-------|
| No                            | 1926 | 94.5% |
| <b>Psychological violence</b> |      |       |
| Yes                           | 889  | 43.7% |
| No                            | 1147 | 56.3% |

### 217 *3.2 Influencing factors*

218 Table 2 shows the results of the logistic regression analysis of physical and  
 219 psychological violence using the matched set (unstratified and stratified by  
 220 gender), including P-values, odds ratios (OR) and 95% confidence intervals  
 221 (95%CI). The unstratified results showed that female respondents had lower odds  
 222 of experiencing physical violence than males did (OR=0.29, 95%CI=0.15-0.55).  
 223 Respondents with anxiety level towards WPV had higher odds of physical violence  
 224 (OR=1.88, 95%CI=1.34-2.62). After stratified by gender, the results showed that  
 225 the educational background of masters and above (OR=7.49, 95%CI=1.27-44.04),  
 226 ethnic minority (OR=3.31, 95%CI=1.12-9.79), anxiety level towards WPV  
 227 (OR=2.46, 95%CI=1.35-4.48) were associated with physical violence occurrence  
 228 for males, while only anxiety level towards WPV (OR=1.84, 95%CI=1.17-2.88)  
 229 was statistically significant in physical violence experience for females.

230 As for psychological violence, minority medical workers had higher odds of  
 231 experiencing it than workers of Han ethnicity (OR=1.54, 95%CI=1.16-2.05).  
 232 Engaging in overtime work from 6 pm to 7 am the following day was also a risk  
 233 factor of psychological violence (OR=1.40, 95%CI=1.02-1.93). Anxiety level about  
 234 WPV was also negatively associated with psychological violence (OR=1.50,

1  
2  
3  
4 235 95%CI=1.33-1.70). When stratified by gender, females who were ethnic  
5  
6  
7 236 minorities (OR=1.71, 95%CI=1.24-2.36) were more likely to suffer psychological  
8  
9 237 violence, while anti-violence training (OR=0.71, 95%CI=0.51-0.99) was  
10  
11 238 positively associated with psychological violence; both males (OR=1.48,  
12  
13  
14 239 95%CI=1.14-1.92) and females (OR=1.51, 95%CI=1.31-1.74) with higher  
15  
16  
17 240 anxiety levels towards WPV were associated with WPV victimization.  
18  
19  
20  
21  
22  
23  
24  
25  
26  
27  
28  
29  
30  
31  
32  
33  
34  
35  
36  
37  
38  
39  
40  
41  
42  
43  
44  
45  
46  
47  
48  
49  
50  
51  
52  
53  
54  
55  
56  
57  
58  
59  
60

241

Table 2. Results of logistic regression of physical and psychological violence (N=960)

|                    | Physical violence   |                   |                 | Psychological violence |                 |                    |
|--------------------|---------------------|-------------------|-----------------|------------------------|-----------------|--------------------|
|                    | Unstratified        | Stratified        |                 | Unstratified           | Stratified      |                    |
|                    |                     | Male              | Female          |                        | Male            | Female             |
| <b>Gender</b>      |                     |                   |                 |                        |                 |                    |
| Male               | Reference           | -                 | -               | Reference              | -               | -                  |
| Female             | 0.29(0.15-0.55) *** | -                 | -               | 0.99(0.71-1.40)        | -               | -                  |
| <b>Ethnicity</b>   |                     |                   |                 |                        |                 |                    |
| Han                |                     | Reference         |                 |                        | Reference       |                    |
| Minority           | 1.57(0.86-2.87)     | 3.31(1.12-9.79) * | 1.18(0.53-2.63) | 1.54(1.16-2.05) **     | 1.07(0.56-2.03) | 1.71(1.24-2.36) ** |
| <b>Age (years)</b> |                     |                   |                 |                        |                 |                    |
| ≤30                |                     | Reference         |                 |                        | Reference       |                    |
| 31-45              | 1.26(0.27-6.01)     | 3.25(0.07-160.96) | 0.76(0.09-6.36) | 1.11(0.55-2.23)        | 0.77(0.19-3.14) | 1.46(0.64-3.33)    |

|    |                                 |                 |                   |                  |                 |                 |                 |
|----|---------------------------------|-----------------|-------------------|------------------|-----------------|-----------------|-----------------|
| 1  |                                 |                 |                   |                  |                 |                 |                 |
| 2  |                                 |                 |                   |                  |                 |                 |                 |
| 3  |                                 |                 |                   |                  |                 |                 |                 |
| 4  |                                 |                 |                   |                  |                 |                 |                 |
| 5  | ≥46                             | 1.44(0.43-4.80) | 0.52 (0.01-19.40) | 2.41(0.45-12.84) | 0.80(0.46-1.42) | 0.49(0.16-1.51) | 1.10(0.55-2.18) |
| 6  |                                 |                 |                   |                  |                 |                 |                 |
| 7  |                                 |                 |                   |                  |                 |                 |                 |
| 8  | <b>Marital status</b>           |                 |                   |                  |                 |                 |                 |
| 9  |                                 |                 |                   |                  |                 |                 |                 |
| 10 | Single                          |                 | Reference         |                  |                 | Reference       |                 |
| 11 |                                 |                 |                   |                  |                 |                 |                 |
| 12 |                                 |                 |                   |                  |                 |                 |                 |
| 13 | Married                         | 0.47(0.08-2.77) | 0.10(0.01-1.86)   | 0.97(0.09-10.92) | 0.85(0.30-2.44) | 0.57(0.05-6.35) | 0.85(0.26-2.78) |
| 14 |                                 |                 |                   |                  |                 |                 |                 |
| 15 | Divorced/widowed                | 0.46(0.09-2.41) | 0.32(0.02-4.84)   | 0.57(0.06-5.42)  | 0.95(0.34-2.62) | 0.78(0.08-7.99) | 0.88(0.28-2.75) |
| 16 |                                 |                 |                   |                  |                 |                 |                 |
| 17 |                                 |                 |                   |                  |                 |                 |                 |
| 18 | <b>Educational background</b>   |                 |                   |                  |                 |                 |                 |
| 19 |                                 |                 |                   |                  |                 |                 |                 |
| 20 |                                 |                 |                   |                  |                 |                 |                 |
| 21 | College graduates               |                 | Reference         |                  |                 | Reference       |                 |
| 22 |                                 |                 |                   |                  |                 |                 |                 |
| 23 | Bachelors                       | 0.98(0.35-2.75) | 0.92(0.10-8.70)   | 0.69(0.21-2.28)  | 0.92(0.58-1.47) | 1.18(0.50-2.83) | 0.88(0.50-1.55) |
| 24 |                                 |                 |                   |                  |                 |                 |                 |
| 25 | Masters and above               | 1.36(0.55-3.38) | 7.49(1.27-44.04)* | 0.45(0.15-1.38)  | 1.20(0.79-1.83) | 1.16(0.55-2.45) | 1.23(0.74-2.07) |
| 26 |                                 |                 |                   |                  |                 |                 |                 |
| 27 |                                 |                 |                   |                  |                 |                 |                 |
| 28 | <b>Years of work experience</b> |                 |                   |                  |                 |                 |                 |
| 29 |                                 |                 |                   |                  |                 |                 |                 |
| 30 |                                 |                 |                   |                  |                 |                 |                 |
| 31 | 1-5                             |                 | Reference         |                  |                 | Reference       |                 |
| 32 |                                 |                 |                   |                  |                 |                 |                 |
| 33 |                                 |                 |                   |                  |                 |                 |                 |
| 34 | 6-10                            | 0.82(0.20-3.31) | 1.00(0.02-51.35)  | 0.99(0.18-5.59)  | 0.54(0.28-1.02) | 0.60(0.16-2.24) | 0.51(0.24-1.08) |
| 35 |                                 |                 |                   |                  |                 |                 |                 |
| 36 | 11-20                           | 0.50(0.14-1.81) | 0.77(0.02-35.11)  | 0.51(0.10-2.53)  | 0.72(0.42-1.28) | 0.62(0.19-2.03) | 0.72(0.36-1.42) |
| 37 |                                 |                 |                   |                  |                 |                 |                 |
| 38 |                                 |                 |                   |                  |                 |                 |                 |
| 39 |                                 |                 |                   |                  |                 |                 |                 |
| 40 |                                 |                 |                   |                  |                 |                 |                 |
| 41 |                                 |                 |                   |                  |                 |                 |                 |
| 42 |                                 |                 |                   |                  |                 |                 |                 |
| 43 |                                 |                 |                   |                  |                 |                 |                 |
| 44 |                                 |                 |                   |                  |                 |                 |                 |
| 45 |                                 |                 |                   |                  |                 |                 |                 |
| 46 |                                 |                 |                   |                  |                 |                 |                 |

1  
2  
3  
4  
5  
6  
7  
8  
9  
10  
11  
12  
13  
14  
15  
16  
17  
18  
19  
20  
21  
22  
23  
24  
25  
26  
27  
28  
29  
30  
31  
32  
33  
34  
35  
36  
37  
38  
39  
40  
41  
42  
43  
44  
45  
46

|                                               |                     |                    |                    |                     |                     |                     |
|-----------------------------------------------|---------------------|--------------------|--------------------|---------------------|---------------------|---------------------|
| >20                                           | 0.80(0.27-2.36)     | 1.37(0.04-53.89)   | 0.85(0.25-2.84)    | 1.34(0.80-2.23)     | 1.44(0.46-4.50)     | 1.24(0.69-2.22)     |
| <b>Work in shift</b>                          |                     |                    |                    |                     |                     |                     |
| Yes                                           | 1.16(0.58-2.35)     | 0.87(0.26-2.94)    | 1.51(0.59-3.86)    | 1.17(0.85-1.61)     | 1.28(0.65-2.52)     | 1.12(0.78-1.63)     |
| No                                            | Reference           |                    |                    | Reference           |                     |                     |
| <b>Overtime duty on call work (6 pm-7 am)</b> |                     |                    |                    |                     |                     |                     |
| Yes                                           | 0.88(0.43-1.78)     | 1.34(0.31-5.86)    | 0.73(0.31-1.72)    | 1.40(1.02-1.93) *   | 1.26(0.57-2.78)     | 1.41(0.99-2.00)     |
| No                                            | Reference           |                    |                    | Reference           |                     |                     |
| <b>Anxiety level</b>                          | 1.88(1.34-2.62) *** | 2.46(1.35-4.48) ** | 1.84(1.17-2.88) ** | 1.50(1.33-1.70) *** | 1.48(1.14-1.92) *** | 1.51(1.31-1.74) *** |
| <b>Anti-violence training</b>                 |                     |                    |                    |                     |                     |                     |
| Yes                                           | 1.25(0.65-2.43)     | 3.29(0.87-12.47)   | 0.89(0.39-2.02)    | 0.80(0.59-1.06)     | 1.09(0.56-2.12)     | 0.71(0.51-0.99) *   |
| No                                            | Reference           |                    |                    | Reference           |                     |                     |

242 Note: (\*): p<0.05; (\*\*): p<0.01; (\*\*\*): p<0.001. All the variables in each logistic regression models were mutually adjusted.

1  
2  
3  
4 243 *3.3 Participants' response to WPV*  
5

6 244 Table 3 shows the different response to psychological/physical violence  
7  
8  
9 245 between Han and ethnic minority healthcare professionals. More Han healthcare  
10  
11 246 professionals ordered perpetrators to stop (OR=0.64, 95%CI=0.45-0.91) and  
12  
13  
14 247 reported to superiors (OR=0.56, 95%CI=0.40-0.79) than ethnic minorities when  
15  
16  
17 248 psychological violence happened, and this difference was statistically significant.  
18  
19 249 As for the physical violence, compared to ethnic minority, more Han healthcare  
20  
21  
22 250 professionals chose to respond in all ways except pretending nothing happened.  
23  
24  
25 251 However, none of the difference was statistically significant.  
26  
27  
28  
29  
30  
31  
32  
33  
34  
35  
36  
37  
38  
39  
40  
41  
42  
43  
44  
45  
46  
47  
48  
49  
50  
51  
52  
53  
54  
55  
56  
57  
58  
59  
60

Table 3. Response to psychological and physical violence

|                                    | Psychological violence |       |                         |       |                    | Physical Violence |       |                        |       |                  |
|------------------------------------|------------------------|-------|-------------------------|-------|--------------------|-------------------|-------|------------------------|-------|------------------|
|                                    | Han (N=727)            |       | Ethnic minority (N=162) |       | OR (95%CI)         | Han (N=88)        |       | Ethnic minority (N=22) |       | OR (95%CI)       |
|                                    | n                      | %     | n                       | %     |                    | n                 | %     | n                      | %     |                  |
| <b>Pretend nothing happened</b>    | 216                    | 29.71 | 49                      | 30.25 | 1.03(0.71-1.49)    | 6                 | 6.82  | 4                      | 18.18 | 3.04(0.78-11.88) |
| <b>Order to stop</b>               | 324                    | 44.57 | 55                      | 33.95 | 0.64(0.45-0.91)*** | 27                | 30.68 | 3                      | 13.64 | 0.36(0.10-1.31)  |
| <b>Talk to families or friends</b> | 474                    | 65.20 | 114                     | 70.37 | 1.27(0.88-1.84)    | 21                | 23.86 | 4                      | 18.18 | 0.71(0.22-2.33)  |
| <b>Psychological counseling</b>    | 70                     | 9.63  | 23                      | 14.20 | 1.55(0.94-2.57)    | 9                 | 10.23 | 2                      | 9.09  | 0.88(0.18-4.39)  |
| <b>Talk to colleague</b>           | 631                    | 86.80 | 131                     | 80.86 | 0.64(0.41-1.01)    | 33                | 37.50 | 6                      | 27.27 | 0.63(0.22-1.76)  |
| <b>Change department</b>           | 47                     | 6.46  | 13                      | 8.02  | 1.26(0.67-2.39)    | 4                 | 4.55  | 0                      | 0.00  | -                |
| <b>Report to superiors</b>         | 469                    | 64.51 | 82                      | 50.62 | 0.56(0.40-0.79)*** | 31                | 35.23 | 6                      | 27.27 | 0.69(0.24-1.94)  |
| <b>Charge perpetrators</b>         | 28                     | 3.85  | 4                       | 2.47  | 0.63(0.22-1.83)    | 5                 | 5.68  | 0                      | 0.00  | -                |

1  
2  
3  
4  
5  
6 253 Note: (\*):  $p < 0.05$ ; (\*\*):  $p < 0.01$ ; (\*\*\*):  $p < 0.001$ . Han participants as the reference.  
7  
8  
9  
10  
11  
12  
13  
14  
15  
16  
17  
18  
19  
20  
21  
22  
23  
24  
25  
26  
27  
28  
29  
30  
31  
32  
33  
34  
35  
36  
37  
38  
39  
40  
41  
42  
43  
44  
45  
46

For peer review only



254

255 *3.4 Anti-violence training measures and content*

256 Table 4 has shown the anti-violence training measures and content expected by  
 257 healthcare professionals. Lectures were the most expected measures of training  
 258 both by Han (54.13%) and ethnic minority (52.62%). Pre-job training was  
 259 expected from half of ethnic minority healthcare professionals, which was slightly  
 260 higher than the proportion of Han healthcare professionals (OR=1.29,  
 261 95%CI=1.01-1.63). Wall newspaper and poster were the least popular measures  
 262 both by Hans and ethnic minorities. As for the training content, more than 70%  
 263 Han and ethnic minority participants expected identification of WPV signs and  
 264 escaping training. Compared to Han, ethnic minority healthcare professionals  
 265 were more interested in force skills (OR=1.40, 95%CI=1.10-1.78) and self-  
 266 defense (OR=1.48, 95%CI=1.10-2.01).

267 **Table 4. Expected measures and contents of anti-violence training (N=2036)**

|                                   | Han |       | Ethnic minority |       | OR (95%CI)      |
|-----------------------------------|-----|-------|-----------------|-------|-----------------|
|                                   | n   | %     | n               | %     |                 |
| <b>Expected training measures</b> |     |       |                 |       |                 |
| Leaflets                          | 680 | 39.74 | 125             | 38.46 | 0.95(0.74-1.21) |
| Video                             | 759 | 44.36 | 145             | 44.62 | 1.01(0.80-1.28) |
| Lectures                          | 926 | 54.12 | 171             | 52.62 | 0.94(0.74-1.19) |
| Wall newspaper, poster            | 435 | 25.42 | 77              | 23.69 | 0.91(0.69-1.20) |
| Employee handbooks                | 507 | 29.63 | 93              | 28.62 | 0.95(0.73-1.24) |

|                                  |      |       |     |       |                    |
|----------------------------------|------|-------|-----|-------|--------------------|
| Pre-job training                 | 751  | 43.89 | 163 | 50.15 | 1.29(1.01-1.63) *  |
| <b>Expected training content</b> |      |       |     |       |                    |
| WPV cognition                    | 891  | 52.07 | 177 | 54.46 | 1.10(0.87-1.40)    |
| Identification of WPV signs      | 1242 | 72.59 | 234 | 72.00 | 0.97(0.75-1.27)    |
| Language skills                  | 1162 | 67.91 | 232 | 71.38 | 1.18(0.91-1.53)    |
| Force skills                     | 815  | 47.63 | 182 | 56.00 | 1.40(1.10-1.78) ** |
| Relevant laws and regulations    | 1113 | 65.05 | 223 | 68.62 | 1.18(0.91-1.52)    |
| Escaping training                | 1235 | 72.18 | 245 | 75.38 | 1.18(0.90-1.55)    |
| Self-defense                     | 1227 | 71.71 | 257 | 79.08 | 1.48(1.10-2.01) *  |

268 Note: (\*):  $p < 0.05$ ; (\*\*):  $p < 0.01$ ; (\*\*\*):  $p < 0.001$ . Han participants as the reference.

### 269 *3.5 Evaluation of the usefulness of WPV interventions*

270 As for the evaluation of interventions, there were no significant differences  
 271 between Han and ethnic minority healthcare professionals. Participants  
 272 considered that security measures were the most useful ways to prevent WPV. The  
 273 following were improving the environment and anti-violence training. More than  
 274 40% considered patient examination and changing the time of shift as useless  
 275 measures. There were few differences when stratified by ethnicity. More Han  
 276 healthcare workers looked down on the usefulness of protective equipment, while  
 277 ethnic minority participants undervalued patient examination and anti-violence  
 278 training. However, none of these differences between Han and ethnic minority  
 279 were statistically significant. (Table 5)

280

**Table 5. Evaluation of the usefulness of WPV interventions (N=2036)**

|                                                                   | All participants |       | Han |       | Ethnic minority |       |
|-------------------------------------------------------------------|------------------|-------|-----|-------|-----------------|-------|
|                                                                   | n                | %     | n   | %     | n               | %     |
| <b>Improve the environment (e.g., enhance lighting)</b>           |                  |       |     |       |                 |       |
| Very useful                                                       | 715              | 35.12 | 611 | 35.71 | 104             | 32.00 |
| Somewhat useful                                                   | 945              | 46.41 | 784 | 45.82 | 161             | 49.54 |
| Useless                                                           | 376              | 18.47 | 316 | 18.47 | 60              | 18.46 |
| <b>Restrict non-staff access</b>                                  |                  |       |     |       |                 |       |
| Very useful                                                       | 591              | 29.03 | 513 | 29.98 | 78              | 24.00 |
| Somewhat useful                                                   | 778              | 38.21 | 638 | 37.29 | 140             | 43.08 |
| Useless                                                           | 667              | 32.76 | 560 | 32.73 | 107             | 32.92 |
| <b>Patient examination (e.g., history of committing violence)</b> |                  |       |     |       |                 |       |
| Very useful                                                       | 498              | 24.46 | 429 | 25.07 | 69              | 21.23 |
| Somewhat useful                                                   | 698              | 34.28 | 586 | 34.25 | 112             | 34.46 |
| Useless                                                           | 840              | 41.26 | 696 | 40.68 | 144             | 44.31 |
| <b>Increase manpower</b>                                          |                  |       |     |       |                 |       |
| Very useful                                                       | 667              | 32.76 | 571 | 33.37 | 96              | 29.54 |
| Somewhat useful                                                   | 796              | 39.10 | 663 | 38.75 | 133             | 40.92 |
| Useless                                                           | 573              | 28.14 | 477 | 27.88 | 96              | 29.54 |
| <b>Protective equipment</b>                                       |                  |       |     |       |                 |       |
| Very useful                                                       | 610              | 29.96 | 522 | 30.51 | 88              | 27.08 |
| Somewhat useful                                                   | 738              | 36.25 | 625 | 36.53 | 113             | 34.77 |

|                                 |     |       |     |       |     |       |
|---------------------------------|-----|-------|-----|-------|-----|-------|
| Useless                         | 688 | 33.79 | 564 | 32.96 | 124 | 38.15 |
| <b>Change the time of shift</b> |     |       |     |       |     |       |
| Very useful                     | 470 | 23.08 | 411 | 24.02 | 59  | 18.15 |
| Somewhat useful                 | 699 | 34.33 | 578 | 33.78 | 121 | 37.23 |
| Useless                         | 867 | 42.58 | 722 | 42.20 | 145 | 44.62 |
| <b>Avoid working alone</b>      |     |       |     |       |     |       |
| Very useful                     | 659 | 32.37 | 568 | 33.20 | 91  | 28.00 |
| Somewhat useful                 | 636 | 31.24 | 526 | 30.74 | 110 | 33.85 |
| Useless                         | 741 | 36.39 | 617 | 36.06 | 124 | 38.15 |
| <b>Anti-violence training</b>   |     |       |     |       |     |       |
| Very useful                     | 785 | 38.56 | 675 | 39.45 | 110 | 33.85 |
| Somewhat useful                 | 800 | 39.29 | 672 | 39.28 | 128 | 39.38 |
| Useless                         | 449 | 22.05 | 362 | 21.16 | 87  | 26.77 |
| <b>Security measures</b>        |     |       |     |       |     |       |
| Very useful                     | 899 | 44.16 | 762 | 44.54 | 137 | 42.15 |
| Somewhat useful                 | 932 | 45.78 | 779 | 45.53 | 153 | 47.08 |
| Useless                         | 205 | 10.07 | 170 | 9.94  | 35  | 10.77 |

281

#### 282 4. Discussion

283 This study examined the prevalence, influence factors, and response of WPV in a  
 284 hospital located in the multi- ethnicity area of China. The percentage of medical  
 285 workers of minority ethnicity was substantially higher than previous studies

1  
2  
3  
4 286 conducted in eastern and central China (2.41–7.95%)<sup>15-17</sup>. Due to the different  
5  
6  
7 287 investigation tools and time period, it is difficult to compare the WPV prevalence  
8  
9  
10 288 with some other researches. However, compared with our previous studies with  
11  
12 289 the same questionnaire and time period, the prevalence of physical and  
13  
14 290 psychological violence in our study are lower than what has been found in areas  
15  
16  
17 291 where Han people mainly lived <sup>7 8 18 19</sup>. The results of logistic regression indicated  
18  
19  
20 292 that ethnic minority healthcare professionals maybe more likely to suffer  
21  
22 293 psychological violence. After stratified by gender, males who were ethnic  
23  
24 294 minorities were more likely to suffer physical violence, while females from  
25  
26  
27 295 psychological violence. The different results in stratified and unstratified analysis  
28  
29  
30 296 may be due to the proportion of males and females. Namely, in unstratified  
31  
32 297 analysis, the fact that males suffered more physical violence would be covered by  
33  
34  
35 298 the fact that females suffered more psychological violence. Some studies from  
36  
37  
38 299 other countries or regions showed that ethnic minority healthcare workers were  
39  
40  
41 300 less likely to experience WPV when comparing to the majority (Whites)<sup>20 21</sup>, while  
42  
43 301 some studies held the opposite conclusion that ethnic minority healthcare  
44  
45 302 professionals were more vulnerable in suffering workplace bullying, verbal abuse,  
46  
47  
48 303 physical violence, etc. <sup>22-26</sup> However, due to the huge difference between the  
49  
50  
51 304 background investigation and participants' characteristics, these studies could not  
52  
53  
54 305 be compared with our study. We speculate several reasons for this result. First,  
55  
56 306 our study showed that there were behavioral differences between Han and ethnic  
57  
58  
59 307 minority, culture and religious beliefs could be key factors in explaining this <sup>27</sup>.  
60

1  
2  
3  
4 308 Second, our study showed that when facing WPV, compared with Han, ethnic  
5  
6 309 minority healthcare professionals may be more likely to tolerate it, which may  
7  
8  
9 310 lead to more violence. Third, the language from difference linguistic culture may  
10  
11 311 hamper the doctor-patient communication, thus lead to violence<sup>28</sup>. Fourth, ethnic  
12  
13 312 minority healthcare professionals' ability or skill maybe undervalued by patients,  
14  
15 313 thus leading to distrust or WPV, which needs further studies to investigate this  
16  
17 314 phenomenon from the patients' perspective.

21  
22 315 Respondents who engaged in overtime duty on call work from 6 pm to 7 am had  
23  
24 316 greater odds of experiencing psychological violence. This is a new finding in our  
25  
26 317 study, which has been ignored in most research of China. We speculate several  
27  
28 318 reasons for this finding. First, our definition of overtime duty on call work might  
29  
30 319 have captured individuals handling urgent issues. The staff working therein are  
31  
32 320 more likely to experience higher levels of frustration, distress, cognitive  
33  
34 321 impairment or arousal<sup>29 30</sup>, which is similar with the WPV high-risk department  
35  
36 322 — emergency department. Second, healthcare professionals would face more  
37  
38 323 aggressive situations such as drunk patients or companions and traumatic  
39  
40 324 patients caused by fighting. Third, since the on-call work is not during the general  
41  
42 325 working time, there are less colleagues and guards. We suggest that more effective  
43  
44 326 measures should be adopted to protect healthcare professionals who engage duty  
45  
46 327 on-call beyond general working time. Future studies should investigate this  
47  
48 328 phenomenon in mainly Han living area.

49 329 The result of logistic regression showed that males have higher odds of  
50  
51  
52  
53  
54  
55  
56  
57  
58  
59  
60

1  
2  
3  
4 330 experiencing physical violence, which is similar to the WPV studies conducted in  
5  
6 331 the areas that Han mainly lived <sup>7 19 31</sup>. In other countries, some studies came to the  
7  
8  
9 332 same conclusion <sup>32-35</sup>, while some studies have reported that women were more  
10  
11 333 vulnerable to physical violence <sup>36</sup>. These different results could be attributed to  
12  
13  
14 334 the different study backgrounds <sup>37</sup>. In many countries, beliefs, ethics, or moral  
15  
16  
17 335 principles serve as guidance for public behavior. For instance, in some Arab  
18  
19 336 countries, being a male is a risk factor of experiencing WPV partly because of  
20  
21  
22 337 cultural norms that reject disrespect of females <sup>35</sup>. Consistent with other  
23  
24  
25 338 researches <sup>7 19</sup> conducted in the areas that Han mainly lives in , our study showed  
26  
27  
28 339 that higher anxiety levels regarding WPV was associated with WPV experience.  
29  
30 340 Further study should determine whether the anxiety is the predisposition of  
31  
32  
33 341 consequence of WPV occurrence.

34  
35 342 Compared to Han, more ethnic minority healthcare professionals pretend  
36  
37  
38 343 nothing happened after suffering physical violence. In addition, they may less  
39  
40  
41 344 likely talk to others about these events, or report to their leaders, or use legal  
42  
43  
44 345 methods. The reason we think there was no statistical significance in this result  
45  
46  
47 346 was that the number of participants who experienced physical violence was small.  
48  
49  
50 347 Despite this, we speculate that this may be due to the cultural belief of ethnic  
51  
52  
53 348 minority that causes them to remain silent. Previous study has proved that talking  
54  
55  
56 349 with others in their surroundings about their WPV was helpful to release their  
57  
58  
59 350 tension or anxiety caused from WPV <sup>38</sup>. Since the anxiety towards WPV is  
60  
351 associated with WPV experience, more social support for the individual, such as

1  
2  
3  
4 352 friends, families, and colleagues, should be provided to help ethnic minority  
5  
6 353 healthcare professionals manage violence through diverse methods instead of  
7  
8  
9 354 tolerating it by themselves. Previous study has shown that in the environment that  
10  
11 355 encourages reporting WPV, more incidents of WPV were reported and healthcare  
12  
13  
14 356 workers gained better awareness of risk for violence, as well as how to avoid  
15  
16  
17 357 potential danger, and how to manage aggressive customers <sup>39</sup>. An adequate WPV  
18  
19 358 reporting system should be established to encourage ethnic minority healthcare  
20  
21  
22 359 professionals to report their WPV experience.

23  
24 360 It seems that both Han and ethnic minority healthcare professionals are less  
25  
26  
27 361 interested in the textual anti-violence training measures (leaflets, poster, wall  
28  
29  
30 362 newspaper, employee handbook). Although printed materials could summarize  
31  
32  
33 363 content and be learned repeatedly, the lack of practice details makes it less  
34  
35 364 effective <sup>40</sup>. Videos hold the advantages such as attractiveness, convenience, clarity  
36  
37  
38 365 of demonstration, superior cost-effectiveness and easy to apply, while lectures  
39  
40  
41 366 contain variety of lively styles such as group interaction and scenario simulation,  
42  
43 367 which makes them more popular <sup>41 42</sup>. Future studies should compare the effect of  
44  
45  
46 368 these measures. Pre-job training is more needed by ethnic minority healthcare  
47  
48  
49 369 workers, which could help them adapt to the work environment better and faster.  
50  
51 370 As for the training content, ethnic minority healthcare professionals are more  
52  
53  
54 371 interested in tough measures. Since ethnic minorities are more likely to suffer  
55  
56  
57 372 psychological violence, they may perceive more threat thus give rise to the  
58  
59 373 tendency of handling violence by force <sup>43 44</sup>.



1  
2  
3  
4 374 Our findings indicated that there was not much difference in evaluation of  
5  
6 375 usefulness of WPV intervention between Han and ethnic minority. Security  
7  
8  
9 376 measure is regarded as the most useful intervention of WPV. China has enacted  
10  
11 377 'Guidance on strengthening the security and protection system construction in  
12  
13  
14 378 hospitals' in 2013, and 'Opinions on strictly punishing medical related crimes and  
15  
16  
17 379 maintaining the medical order' in 2017, to strengthen security of hospital.  
18  
19 380 However, since these policies served as instructions rather than mandatory  
20  
21  
22 381 regulations, insufficient resource had constrained the implementation in all  
23  
24  
25 382 hospitals. Security measures are not only an intervention that could prevent  
26  
27 383 healthcare professionals from WPV, but also may enhance the sense of safety as a  
28  
29  
30 384 kind of organizational support. Hospitals should implement specific scale of  
31  
32  
33 385 security measures according to the actual situation. Most participants consider  
34  
35 386 anti-violence training useful. Although it could increase knowledge and boost  
36  
37  
38 387 confidence, the effect could not reduce of WPV incidents for long-term <sup>45</sup>. We  
39  
40 388 suggest that it is essential to make a complete and periodic curriculum for  
41  
42  
43 389 repetitive training. Improving environment, such as enhancing lighting and  
44  
45  
46 390 installing cameras, should be considered as a useful measure. A previous study has  
47  
48 391 shown that working in a daring environment at night is a risk factor of WPV <sup>46</sup>.  
49  
50  
51 392 Camera installation is required by Occupational Safety and Health Administration  
52  
53 393 (OSHA)<sup>47</sup>, which may be a deterrence for committing violence. Using protective  
54  
55  
56 394 equipment is not a popular intervention. In the period of frequent WPV in China,  
57  
58 395 there are indeed some healthcare workers wearing a helmet at work <sup>48</sup>. However,  
59  
60

1  
2  
3  
4 396 this may lead to a more tense doctor-patient relationship. Participants do not trust  
5  
6  
7 397 patient examination and restriction to non-staff access. Due to large hospital  
8  
9  
10 398 scales and treatment numbers, there would be numerous patients admitted to  
11  
12 399 hospital. The process of patient examination and restriction of non-staff access  
13  
14 400 would not be serious enough, otherwise the crowded queue and longer waiting  
15  
16  
17 401 time may breed new contradictions. In addition, since there is no system or  
18  
19  
20 402 platform sharing the patient's information between each hospital, it is difficult to  
21  
22 403 verify WPV history strictly. Although previous studies have shown that work shift  
23  
24 404 is negatively associated with WPV <sup>19 33 35</sup>, changing the time of shift are treated as  
25  
26  
27 405 less useful. It may be better to enhance the protection during shift rather than  
28  
29  
30 406 changing the regulation.

31  
32 407 Due to the research purpose and background, most previous WPV studies were  
33  
34  
35 408 conducted in several hospitals, which has several advantages. Firstly, more  
36  
37  
38 409 samples could be collected to make a more reliable conclusion. In addition, the  
39  
40  
41 410 results could reflect common problems in a certain context. However, at the same  
42  
43  
44 411 time, it would neglect some specific factors or characteristics. The investigation  
45  
46  
47 412 conducted in a typical and representative hospital is conducive to examine the  
48  
49  
50 413 relation between specific factors or information and WPV, which could also be an  
51  
52  
53 414 effective reference of practical work for hospitals with similar features. Our study  
54  
55  
56 415 has exploratively examined WPV in multi-ethnicity area using PSM, and which  
57  
58  
59 416 method was conducive to control confounders and minimized the bias caused by  
60  
417 quantity gap. As a cross-sectional study, the causal conclusion on ethnicity and

1  
2  
3  
4 418 gender could be strengthened by this temporality. In addition, our study has given  
5  
6 419 a complete report about WPV, including prevalence, influencing factor, healthcare  
7  
8  
9 420 professionals' response to WPV, expected content and measure of anti-violence  
10  
11 421 training, and healthcare professionals' evaluation of WPV interventions, which  
12  
13  
14 422 was helpful to interpret WPV from wider aspects.

## 17 423 **5. Limitations**

19 424 This study has a few limitations. First, since the respondents were asked to  
20  
21  
22 425 report WPV that had taken place in the past 12 months, violence might not be  
23  
24  
25 426 adequately reported due to recall bias or reporting bias resulting from shame and  
26  
27 427 stigma. Second, the study exploratively examined the WPV in multi-ethnicity area  
28  
29  
30 428 but did not conduct in-depth research on the underlying cause by cultural factors.  
31  
32 429 Third, our study is limited to consider the temporality between the influencing  
33  
34  
35 430 factor and WPV, which makes it difficult to conclude the causation. In addition, the  
36  
37 431 clustering effect of WPV in several departments were not fully considered, which  
38  
39  
40 432 may affect the standard error of the results. Future research should investigate the  
41  
42  
43 433 perpetrators or patients, especially explore WPV by qualitative methods.

## 45 434 **6. Conclusion**

48 435 Our study investigated WPV in a hospital located in a multi-ethnicity area.  
49  
50  
51 436 Ethnic minority healthcare professionals may be more likely to suffer WPV and  
52  
53 437 have different responses to WPV compared to Han. Additionally, we broke through  
54  
55  
56 438 the single focus of existing WPV research and explored WPV from a more  
57  
58  
59 439 comprehensive perspective including prevalence, influencing factors, response to  
60

1  
2  
3  
4 440 WPV, expected anti-violence training measures and contents, and evaluation of  
5  
6 441 interventions, which may provide a practical reference to hospitals with similar  
7  
8 442 characteristics. Moreover, WPV research should be conducted in multi-ethnicity  
9  
10 443 areas from the perspective of the perpetrator or patients, especially by qualitative  
11  
12 444 methods.  
13  
14  
15  
16  
17 445

18  
19 446 **Contributors** : Mingli Jiao, Jingfu Mao and Qunhong Wu contributed to the  
20  
21 447 conception and design of the study. Haonan Jia, Huiying Fang, Yameng Wang,  
22  
23 448 Kexin Jiang, Yuanheng Li, Ying Wang, Lifeng Wei, and Gangyu Zhang contributed  
24  
25 449 to the data collection. Omar Yacouba Ismael, Haonan Jia and Xiaowen Jia  
26  
27 450 contributed to literature search and data quality control. Huiying Fang and  
28  
29 451 Haonan Jia, Ruohui Chen did the statistical analysis and drafted the original  
30  
31 452 manuscript. Mingli Jiao revised the manuscript for important intellectual content.  
32  
33 453 Ruohui Chen, Kexin Jiang and Jingqun Li prepared the manuscript and  
34  
35 454 supplementary material. All authors contributed to data interpretation and  
36  
37 455 rewriting the paper.  
38  
39  
40  
41  
42  
43  
44

45 456 Haonan Jia, Huiying Fang, Ruohui Chen contributed equally to this work. Mingli  
46  
47 457 Jiao and Jingfu Mao are corresponding author.  
48  
49  
50

51 458

#### 53 459 **Funding**

54  
55  
56 460 This study was funded by the Natural Science Foundation of China (Grant  
57  
58 461 No.71273002, 71473064); New Century Excellent Talents of University from the  
59  
60

1  
2  
3  
4 462 Ministry of Education, China (Grant No.1252-NCET02); the China Postdoctoral  
5  
6 463 Science Foundation (Grant No.2015M570211, 2016T90181); the Heilongjiang  
7  
8  
9 464 Provincial Association of Social Sciences (Grant No.15058), and the Collaborative  
10  
11 465 Innovation Centre of Social Risks Governance in Health; Think Tank of Public  
12  
13  
14 466 Health Security and Health Reform of Heilongjiang Province.

15  
16  
17 467 **Consent for publication:** Not applicable.

18  
19 468 **Competing interests:** The authors declare that they have no competing interests.

20  
21  
22 469 **Acknowledgements:** We thank the management office and all the participants for  
23  
24  
25 470 data collection.

26  
27 471 **Data sharing statement:** Data are available from the corresponding author and  
28  
29  
30 472 investigation hospital upon reasonable request.

### 31 32 473 **Reference**

- 33  
34  
35 474 1. Framework guidelines for addressing workplace violence in the health sector.  
36  
37 475 Geneva, Switzerland,: ISBN, 2002.
- 38  
39 476 2. Zhao M, Jiang K, Yang L, et al. The Big Data Research on Violence against Doctors:  
40  
41 477 Based on the Media Report from 2000 to 2015 *Medicine & Philosophy*  
42  
43 478 2017;38(01):89-93.
- 44  
45 479 3. Liqun Y, Shoufang J, Xiaoxia T, et al. Analysis of prevalence of workplace violence  
46  
47 480 in staff of two hospitals in Tangshan. *Modern Preventive Medicine*  
48  
49 481 2006;33(2):147-52.
- 50  
51 482 4. Jing G, Pei H, Xiaoli Z, et al. The investigation on coping capacity of nursing staff  
52  
53 483 to medical workplace violence. *Chinese Nursing Management*  
54  
55 484 2015;15(6):688-91.
- 56  
57 485 5. Lin H, Yan J, Jian W, et al. A survey on effect of workplace violence in hospital on  
58  
59 486 work-related stress of medical staffs. *Chongqing Medicine*  
60  
487 2012;41(06):590-92.

- 488 6. Chen ZH, Wang SY, Jing CX, et al. Prevalence of workplace violence in staff of two  
489 hospitals in Guangzhou. *Chinese Journal of Preventive Medicine*  
490 2003;37(5):358.
- 491 7. Liu H, Zhao S, Jiao M, et al. Extent, nature, and risk factors of workplace violence  
492 in public tertiary hospitals in China: a cross-sectional survey. *International*  
493 *Journal of Environmental Research and Public Health* 2015;12(6):6801-17.
- 494 8. Zhao S, Liu H, Ma H, et al. Coping with Workplace Violence in Healthcare Settings:  
495 Social Support and Strategies. *International journal of environmental*  
496 *research and public health* 2015;12:14429-44.
- 497 9. Coate S, Loury GC. Will Affirmative-Action Policies Eliminate Negative  
498 Stereotypes? *The American Economic Review* 1993;83(5):1220-40.
- 499 10. Hasmath R, Ho B. Job acquisition, retention, and outcomes for ethnic minorities  
500 in urban China. *Eurasian Geography and Economics* 2015;56(1):24-43.
- 501 11. White paper on medical practice in China: Chinese Medical Doctor Association,  
502 2017.
- 503 12. Ji H, Tian K, Yunsen Z. Studying on the guarantee of medical professionals' right  
504 of rest and construction of harmonious doctor-patient relationship. *The*  
505 *Chinese Health Service Management* 2016;33(05):368-70.
- 506 13. Tak S, Sweeney MH, Alterman T, et al. Workplace Assaults on Nursing  
507 Assistants in US Nursing Homes: A Multilevel Analysis. *American Journal of*  
508 *Public Health* 2010;100(10):1938-45.
- 509 14. Cai W, Deng L, Liu M, et al. Antecedents of Medical Workplace Violence in South  
510 China. *Journal of Interpersonal Violence* 2011;26(2):312-27.
- 511 15. Liu Y, Deng L, Min Y. Investigation of psychological violence at hospital  
512 workplace in Guangzhou. *Chinese Journal of Public Health*  
513 2009;25(09):1050-51.
- 514 16. Qianqian W, Lei X. Investigation of workplace violence and influencing factors  
515 of nurses in Pingyang County General Hospital. *Journal of Traditional*  
516 *Chinese Medicine Management* 2016;24(17):18-20.
- 517 17. Lulu S. The research of prevention of hospital workplace violence based on

- 1  
2  
3  
4 518 game theory – through the analysis of hospital, patient, and media as game  
5  
6 519 role players. Jilin University, 2014.
- 7  
8 520 18. Jiao M, Ning N, Li Y, et al. Workplace violence against nurses in Chinese  
9  
10 521 hospitals: a cross-sectional survey. *Bmj Open* 2015;5(3):e006719.
- 11  
12 522 19. Sun P, Zhang X, Sun Y, et al. Workplace Violence against Health Care Workers  
13  
14 523 in North Chinese Hospitals: A Cross-Sectional Survey. *International Journal*  
15  
16 524 *of Environmental Research and Public Health* 2017;14(1):96.
- 17  
18 525 20. Baukje M, Ryan H, Anita LL, et al. Prevalence of abusive encounters in the  
19  
20 526 workplace of family physicians: a minor, major, or severe problem?  
21  
22 527 *Canadian Family Physician Médecin De Famille Canadien* 2010;56(3):e101.
- 23  
24 528 21. Campbell JC, Jill Theresa M, Joan K, et al. Workplace violence: prevalence and  
25  
26 529 risk factors in the safe at work study. *Journal of Occupational &*  
27  
28 530 *Environmental Medicine* 2011;53(1):82.
- 29  
30 531 22. Lyn Q. Workplace bullying in junior doctors: questionnaire survey. *British*  
31  
32 532 *Medical Journal* 2002;324(7342):878-79.
- 33  
34 533 23. Jane B, Geoff P. At breaking point: A survey of the wellbeing and working lives  
35  
36 534 of nurses in 2005. London, England: Royal College of Nursing, 2006.
- 37  
38 535 24. Giga SI, Hoel H, Lewis D. A Review of Black and Minority Ethnic (BME)  
39  
40 536 Employee Experiences of Workplace Bullying. 2008
- 41  
42 537 25. Keshet Y, Popper-Giveon A. Race-based experiences of ethnic minority health  
43  
44 538 professionals: Arab physicians and nurses in Israeli public healthcare  
45  
46 539 organizations. *Ethnicity & Health* 2017;23(4):1-18.
- 47  
48 540 26. Dehghan-Chaloshtari S, Ghodousi A. Factors and Characteristics of Workplace  
49  
50 541 Violence Against Nurses: A Study in Iran. *Journal of Interpersonal Violence*  
51  
52 542 2017:088626051668317.
- 53  
54 543 27. Kang C. Cultural differences between Tibetans and ethnic Han Chinese in  
55  
56 544 ultimatum bargaining experiments. *Journal of Political Economy*  
57  
58 545 2009;25(1):78-84.
- 59  
60 546 28. Perloff RM, Bonder B, Ray GB, et al. Doctor-patient communication, cultural  
547 547 competence, and minority health: Theoretical and empirical perspectives.



- 1  
2  
3  
4 548 *American Behavioral Scientist* 2006;49(6):835-52.
- 5  
6 549 29. Beech B, Leather P. Workplace violence in the health care sector: A review of  
7  
8 550 staff training and integration of training evaluation models. *Aggression and*  
9  
10 551 *Violent Behavior* 2006;11(1):27-43.
- 11  
12 552 30. Hahn S, Zeller A, Needham I, et al. Patient and visitor violence in general  
13  
14 553 hospitals: A systematic review of the literature. *Aggression and Violent*  
15  
16 554 *Behavior* 2008;13(6):431-41.
- 17  
18 555 31. Siying W, Wei Z, Huangyuan L, et al. Workplace violence and influencing factors  
19  
20 556 among medical professionals in China. *American Journal of Industrial*  
21  
22 557 *Medicine* 2012;55(11):1000-08.
- 23  
24 558 32. Algwaiz WM, Alghanim SA. Violence exposure among health care professionals  
25  
26 559 in Saudi public hospitals. A preliminary investigation. *Saudi Medical*  
27  
28 560 *Journal* 2012;33(1):76.
- 29  
30 561 33. Carluccio A, Knychala V, Marshall C. Violence against frontline NHS staff.  
31  
32 562 London: NHS Security Management Service, 2010.
- 33  
34 563 34. Flannery RB, Walker AP. Characteristics of four types of patient assaults: six  
35  
36 564 year analysis of the Assaulted Staff Action Program (ASAP). *Psychiatric*  
37  
38 565 *Quarterly* 2011;82(1):11-21.
- 39  
40 566 35. Kitaneh M, Hamdan M. Workplace violence against physicians and nurses in  
41  
42 567 Palestinian public hospitals: a cross-sectional study. *Bmc Health Services*  
43  
44 568 *Research* 2012;12(1):1-9.
- 45  
46 569 36. Arimatsu M, Wada K, Yoshikawa T, et al. An epidemiological study of work-  
47  
48 570 related violence experienced by physicians who graduated from a medical  
49  
50 571 school in Japan. *Journal of Occupational Health* 2008;50(5):357-61.
- 51  
52 572 37. Hills D, Joyce C. A review of research on the prevalence, antecedents,  
53  
54 573 consequences and prevention of workplace aggression in clinical medical  
55  
56 574 practice. *Aggression and Violent Behavior* 2013;18(5):554-69.
- 57  
58 575 38. Coker AL, Smith PH, Thompson MP, et al. Social support protects against the  
59  
60 576 negative effects of partner violence on mental health. *Journal of Women's*  
577 *Health & Gender-based Medicine* 2002;11(5):465-76.



- 1  
2  
3  
4 578 39. Arnetz JE, Arnetz BB. Implementation and evaluation of a practical  
5  
6 579 intervention programme for dealing with violence towards health care  
7  
8 580 workers. *Journal of Advanced Nursing* 2000;31(3):668-80.
- 9  
10 581 40. Ramezaninia J, Naghibi Sistani M, Ahangari Z, et al. Comparison of the effect of  
11  
12 582 toothbrushing education via video, lecture and pamphlet on the dental  
13  
14 583 plaque index of 12-year-old children. *Children* 2018;5(4):50.
- 15  
16 584 41. Li F, Jiang F, Jin X-M, et al. Cost-efficiency assessment of 3 different pediatric  
17  
18 585 first-aid training models for caregivers and teachers in Shanghai. *Pediatric*  
19  
20 586 *emergency care* 2011;27(5):357-60.
- 21  
22 587 42. Lees A, Rock W. A Comparison between Written, Verbal, and Videotape Rral  
23  
24 588 Hygiene Instruction for Patients with Fixed Appliances. *British Journal of*  
25  
26 589 *Orthodontics* 2000;27(4):323-28.
- 27  
28 590 43. Meloy JR. Pathologies of attachment, violence, and criminality. *Handbook of*  
29  
30 591 *Psychology* 2003:509-26.
- 31  
32 592 44. Meloy JR. The psychopathic mind: Origins, dynamics, and treatment: Rowman  
33  
34 593 & Littlefield 1988.
- 35  
36 594 45. Heckemann B, , Zeller A, , Hahn S, , et al. The effect of aggression management  
37  
38 595 training programmes for nursing staff and students working in an acute  
39  
40 596 hospital setting. A narrative review of current literature. *Nurse Education*  
41  
42 597 *Today* 2015;35(1):212-19.
- 43  
44 598 46. Moore PV, Simonowitz JA, Rigdon JE, et al. Workplace violence: prevention  
45  
46 599 efforts by the occupational health nurse. *AAOHN Journal* 1997;45(6):305-  
47  
48 600 18.
- 49  
50 601 47. Guidelines for preventing workplace violence for health care social service  
51  
52 602 workers. Guidelines for preventing workplace violence for health care  
53  
54 603 social service workers: Occupational Safety Health Administration 2004.
- 55  
56 604 48. Healthcare workers wear helmets to work for safety: Sina; 2006 [Available  
57  
58 605 from:[http://news.sina.com.cn/s/p/2006-12-](http://news.sina.com.cn/s/p/2006-12-25/064711876752.shtml)  
59  
60 606 [25/064711876752.shtml](http://news.sina.com.cn/s/p/2006-12-25/064711876752.shtml)2006.

1  
2  
3  
4  
5  
6  
7  
8  
9  
10  
11  
12  
13  
14  
15  
16  
17  
18  
19  
20  
21  
22  
23  
24  
25  
26  
27  
28  
29  
30  
31  
32  
33  
34  
35  
36  
37  
38  
39  
40  
41  
42  
43  
44  
45  
46  
47  
48  
49  
50  
51  
52  
53  
54  
55  
56  
57  
58  
59  
60

607

For peer review only

**STROBE 2007 (v4) Statement—Checklist of items that should be included in reports of *cross-sectional studies***

| Section/Topic                | Item # | Recommendation                                                                                                                                                                       | Reported on page # |
|------------------------------|--------|--------------------------------------------------------------------------------------------------------------------------------------------------------------------------------------|--------------------|
| <b>Title and abstract</b>    | 1      | (a) Indicate the study’s design with a commonly used term in the title or the abstract                                                                                               | 2                  |
|                              |        | (b) Provide in the abstract an informative and balanced summary of what was done and what was found                                                                                  | 2-3                |
| <b>Introduction</b>          |        |                                                                                                                                                                                      |                    |
| Background/rationale         | 2      | Explain the scientific background and rationale for the investigation being reported                                                                                                 | 3-6                |
| Objectives                   | 3      | State specific objectives, including any prespecified hypotheses                                                                                                                     | 6                  |
| <b>Methods</b>               |        |                                                                                                                                                                                      |                    |
| Study design                 | 4      | Present key elements of study design early in the paper                                                                                                                              | 6                  |
| Setting                      | 5      | Describe the setting, locations, and relevant dates, including periods of recruitment, exposure, follow-up, and data collection                                                      | 6-8                |
| Participants                 | 6      | (a) Give the eligibility criteria, and the sources and methods of selection of participants                                                                                          | 8                  |
| Variables                    | 7      | Clearly define all outcomes, exposures, predictors, potential confounders, and effect modifiers. Give diagnostic criteria, if applicable                                             | 7-8                |
| Data sources/<br>measurement | 8*     | For each variable of interest, give sources of data and details of methods of assessment (measurement). Describe comparability of assessment methods if there is more than one group | 7-9                |
| Bias                         | 9      | Describe any efforts to address potential sources of bias                                                                                                                            | -                  |
| Study size                   | 10     | Explain how the study size was arrived at                                                                                                                                            | 8                  |
| Quantitative variables       | 11     | Explain how quantitative variables were handled in the analyses. If applicable, describe which groupings were chosen and why                                                         | 8-9                |
| Statistical methods          | 12     | (a) Describe all statistical methods, including those used to control for confounding                                                                                                | 8-9                |
|                              |        | (b) Describe any methods used to examine subgroups and interactions                                                                                                                  | -                  |
|                              |        | (c) Explain how missing data were addressed                                                                                                                                          | -                  |
|                              |        | (d) If applicable, describe analytical methods taking account of sampling strategy                                                                                                   | -                  |
|                              |        | (e) Describe any sensitivity analyses                                                                                                                                                | -                  |
| <b>Results</b>               |        |                                                                                                                                                                                      |                    |

|                          |     |                                                                                                                                                                                                              |       |
|--------------------------|-----|--------------------------------------------------------------------------------------------------------------------------------------------------------------------------------------------------------------|-------|
| Participants             | 13* | (a) Report numbers of individuals at each stage of study—eg numbers potentially eligible, examined for eligibility, confirmed eligible, included in the study, completing follow-up, and analysed            | 8     |
|                          |     | (b) Give reasons for non-participation at each stage                                                                                                                                                         | 8     |
|                          |     | (c) Consider use of a flow diagram                                                                                                                                                                           | -     |
| Descriptive data         | 14* | (a) Give characteristics of study participants (eg demographic, clinical, social) and information on exposures and potential confounders                                                                     | 10    |
|                          |     | (b) Indicate number of participants with missing data for each variable of interest                                                                                                                          | -     |
| Outcome data             | 15* | Report numbers of outcome events or summary measures                                                                                                                                                         | 10-20 |
| Main results             | 16  | (a) Give unadjusted estimates and, if applicable, confounder-adjusted estimates and their precision (eg, 95% confidence interval). Make clear which confounders were adjusted for and why they were included | 10-20 |
|                          |     | (b) Report category boundaries when continuous variables were categorized                                                                                                                                    | 10-16 |
|                          |     | (c) If relevant, consider translating estimates of relative risk into absolute risk for a meaningful time period                                                                                             | -     |
| Other analyses           | 17  | Report other analyses done—eg analyses of subgroups and interactions, and sensitivity analyses                                                                                                               | -     |
| <b>Discussion</b>        |     |                                                                                                                                                                                                              |       |
| Key results              | 18  | Summarise key results with reference to study objectives                                                                                                                                                     | 21    |
| Limitations              | 19  | Discuss limitations of the study, taking into account sources of potential bias or imprecision. Discuss both direction and magnitude of any potential bias                                                   | 26-27 |
| Interpretation           | 20  | Give a cautious overall interpretation of results considering objectives, limitations, multiplicity of analyses, results from similar studies, and other relevant evidence                                   | 21-26 |
| Generalisability         | 21  | Discuss the generalisability (external validity) of the study results                                                                                                                                        | 27    |
| <b>Other information</b> |     |                                                                                                                                                                                                              |       |
| Funding                  | 22  | Give the source of funding and the role of the funders for the present study and, if applicable, for the original study on which the present article is based                                                | 28    |

\*Give information separately for cases and controls in case-control studies and, if applicable, for exposed and unexposed groups in cohort and cross-sectional studies.

**Note:** An Explanation and Elaboration article discusses each checklist item and gives methodological background and published examples of transparent reporting. The STROBE checklist is best used in conjunction with this article (freely available on the Web sites of PLoS Medicine at <http://www.plosmedicine.org/>, Annals of Internal Medicine at <http://www.annals.org/>, and Epidemiology at <http://www.epidem.com/>). Information on the STROBE Initiative is available at [www.strobe-statement.org](http://www.strobe-statement.org).
